# Supplementary material for: Pd-Catalyzed sequential hydroarylation and olefination reactions of 3-allylchromones
Source: Royal Society of Chemistry journal article supplement (doi:10.1039/c9ob01147a), 2019-01-01
Supplement: c9ob01147a1.pdf [file c9ob01147a1.pdf]

# **Pd-Catalyzed Sequential Hydroarylation and Olefination Reactions of 3-Allylchromones**

Yi-En Liang, Chia-Ling Lu, and Wen-Tai Li\*

National Research Institute of Chinese Medicine, Ministry of Health and Welfare,  
Taipei 11221, Taiwan, R.O.C.

\*Email: [wqli@nriem.edu.tw](mailto:wqli@nriem.edu.tw)

## **Supporting Information**

| <b>Table of Contents</b>                        | <b>Page No</b> |
|-------------------------------------------------|----------------|
| 1. $^1\text{H}$ and $^{13}\text{C}$ NMR spectra | S2             |
| 2. ORTEP diagram of <b>2c</b>                   | S63            |
| 3. X-ray data of <b>2c</b>                      | S64            |

### 3-Allyl-7-methoxy-4H-chromen-4-one (1a)

<sup>1</sup>H NMR

PROTON\_01 — J45\_CDCl3\_600 2018/02/01 —

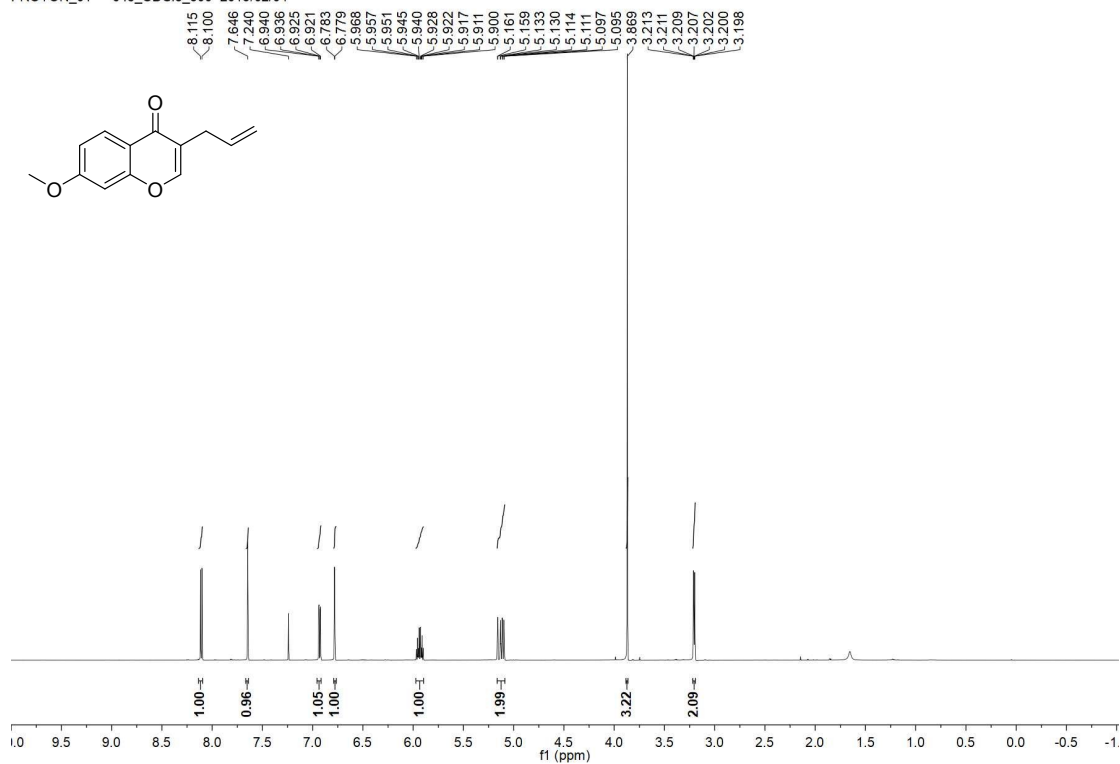

### 3-Allyl-4H-chromen-4-one (1b)

<sup>1</sup>H NMR

PROTON\_01 — J47\_CDCl3\_600 2018/02/01 —

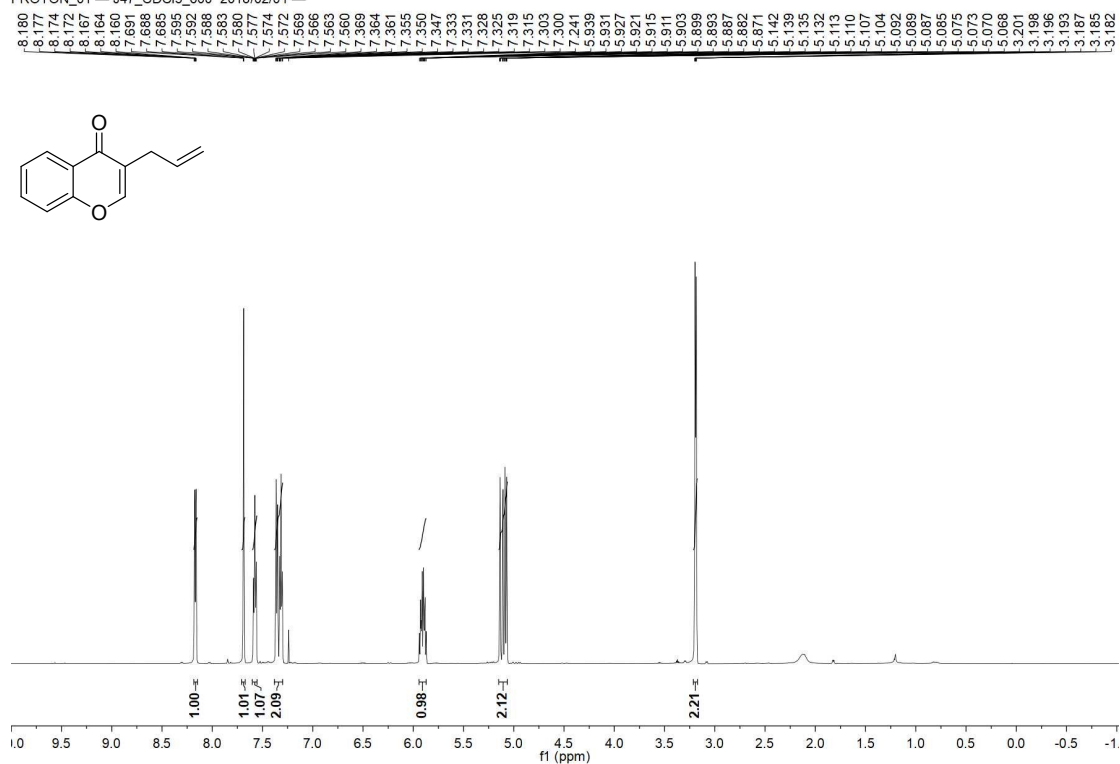

### 3-Allyl-6-chloro-4H-chromen-4-one (**1d**)

<sup>1</sup>H NMR

PROTON\_01 — J42\_CDCl3\_600 2018/02/01 —

8.156  
8.152  
7.721  
7.719  
7.717  
7.565  
7.561  
7.350  
7.346  
7.374  
7.359  
7.230  
6.618  
5.937  
5.931  
5.926  
5.920  
5.909  
5.903  
5.897  
5.892  
5.881  
5.170  
5.168  
5.165  
5.162  
5.142  
5.139  
5.136  
5.133  
5.131  
5.128  
5.126  
5.116  
5.114  
5.111  
5.109  
3.223  
3.221  
3.218  
3.216  
3.212  
3.209  
3.207  
3.205

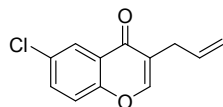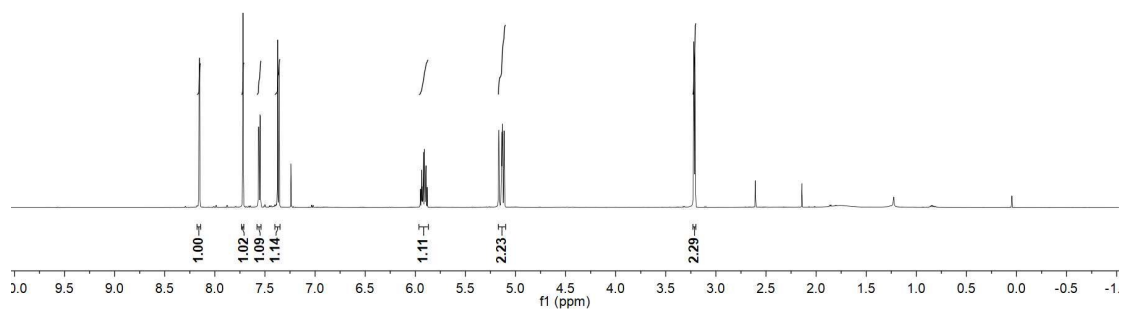

*(E)*-3-(But-2-en-1-yl)-4H-chromen-4-one (**3a**)

<sup>1</sup>H NMR

PROTON\_01 — J66\_A7-12\_CDCl3\_500 2019/01/15 —

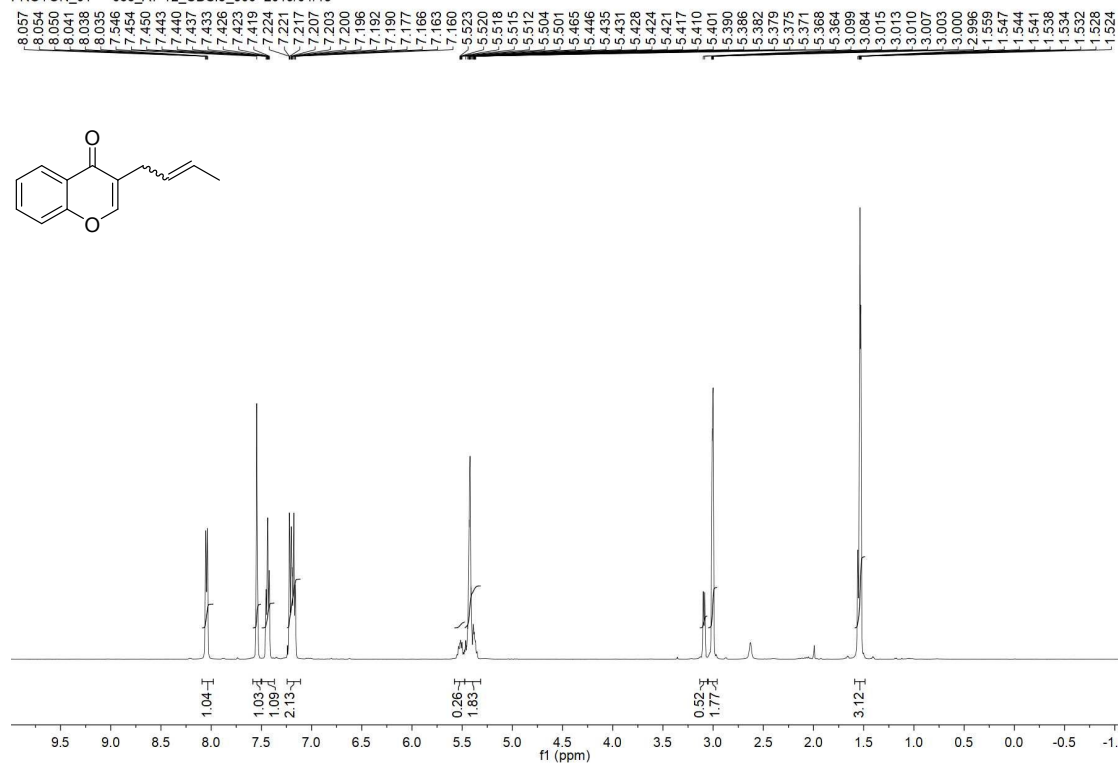

<sup>13</sup>C NMR

CARBON\_01 — J66\_A7-12\_CDCl3\_500 2019/01/15 —

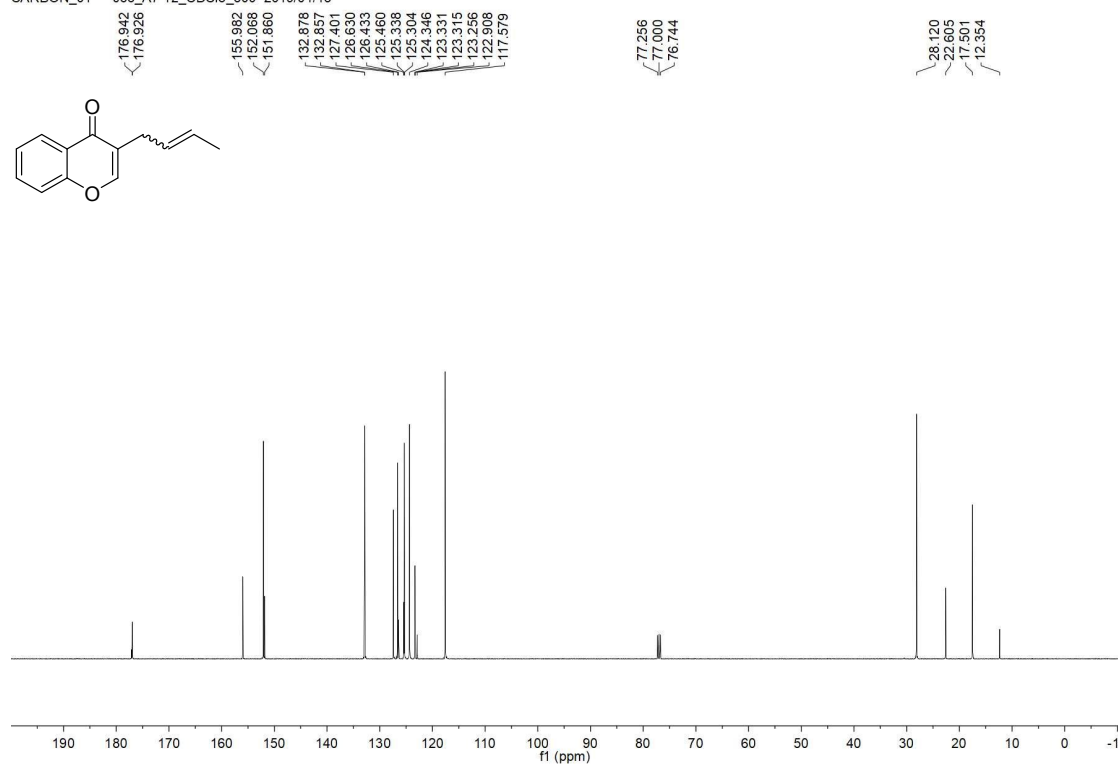

### 3-(But-2-en-1-yl)-7-methoxy-4H-chromen-4-one (3b)

<sup>1</sup>H NMR

PROTON\_01 — J61\_CDCl3\_600 2018/01/29 —

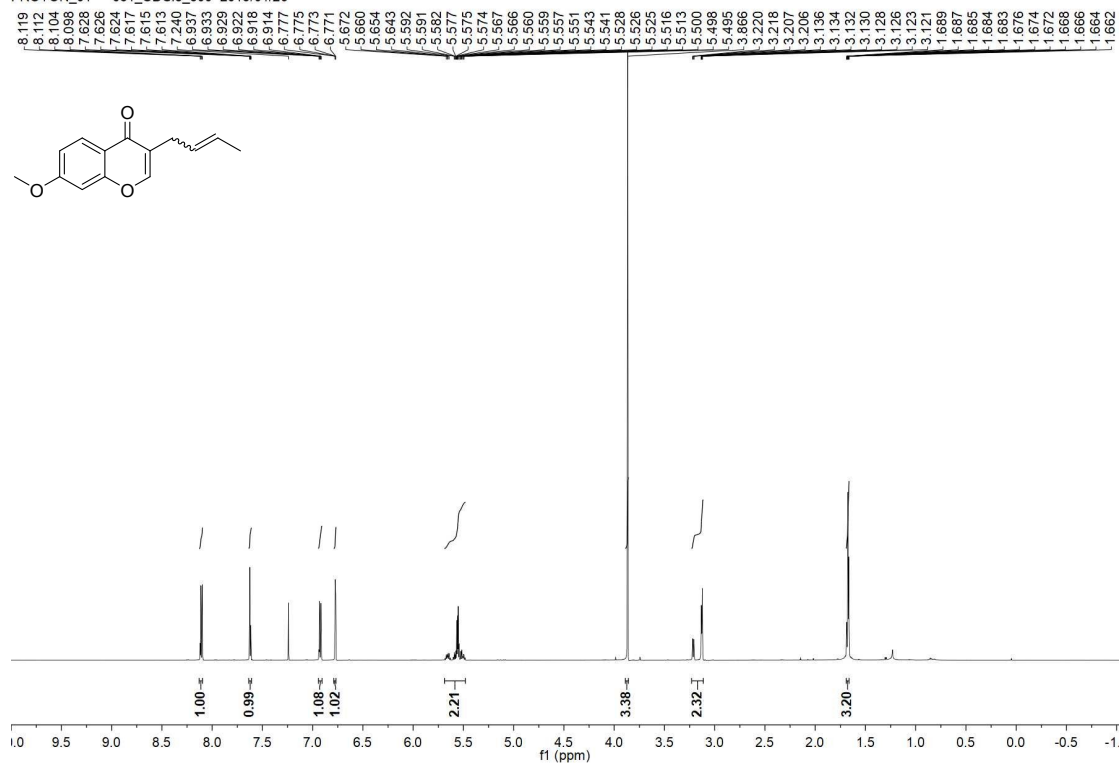

<sup>13</sup>C NMR

CARBON\_01 — J61\_CDCl3\_600 2018/01/29 —

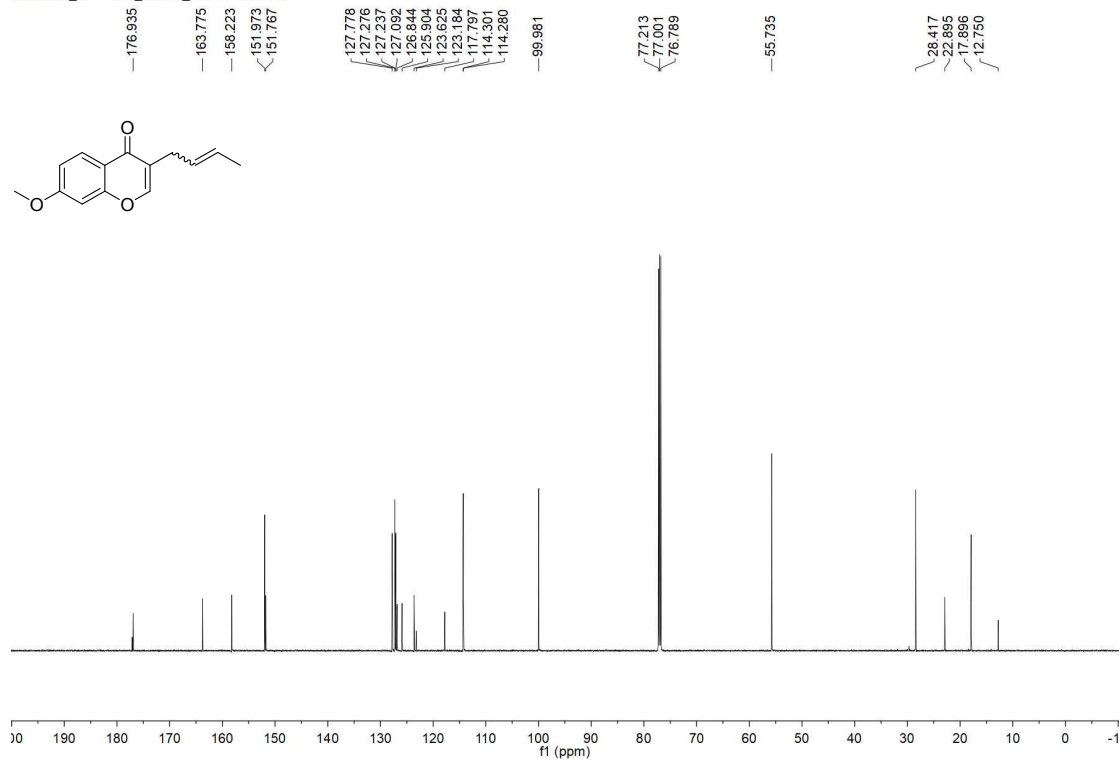

### 3-(But-2-en-1-yl)-6-chloro-4H-chromen-4-one (3c)

<sup>1</sup>H NMR

PROTON\_01 — J62\_CDCl3\_500 2019/01/04 —

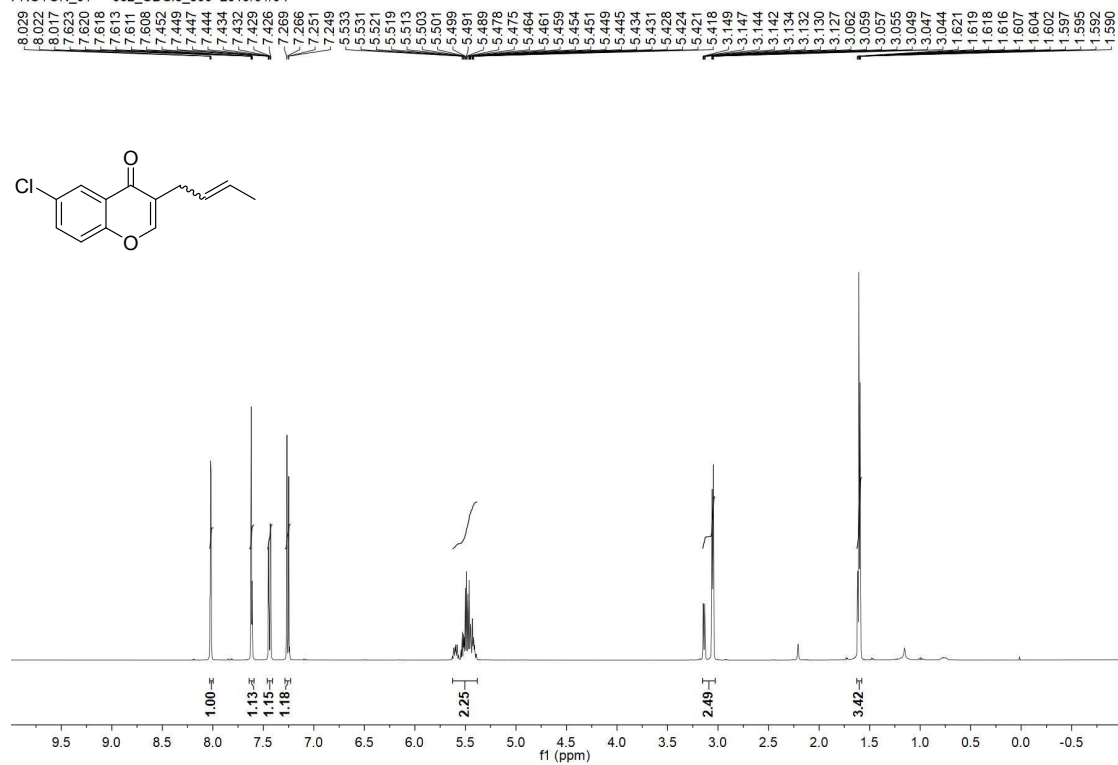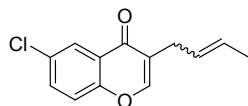

<sup>13</sup>C NMR

CARBON\_01 — J62\_CDCl3\_500 2019/01/04 —

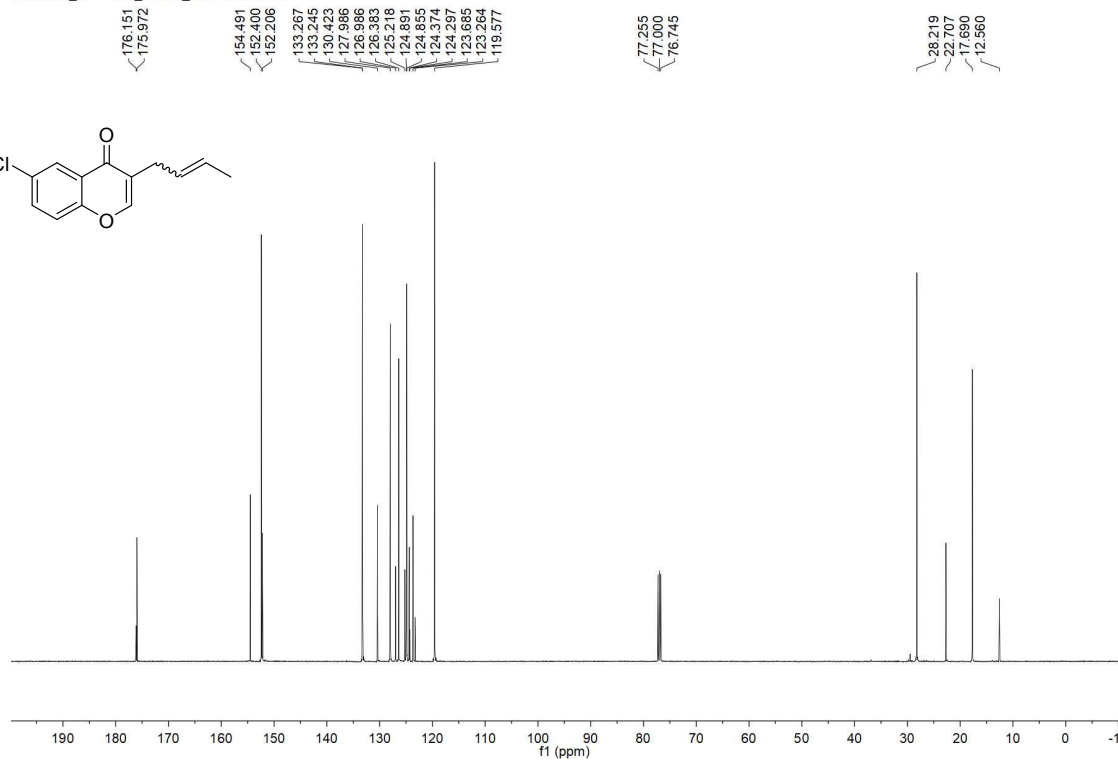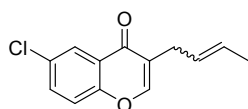

### 3-Cinnamyl-7-methoxy-4H-chromen-4-one (5a)

#### <sup>1</sup>H NMR

PROTON\_02 — L268-A15\_CDCl3\_600 2017/11/06 —

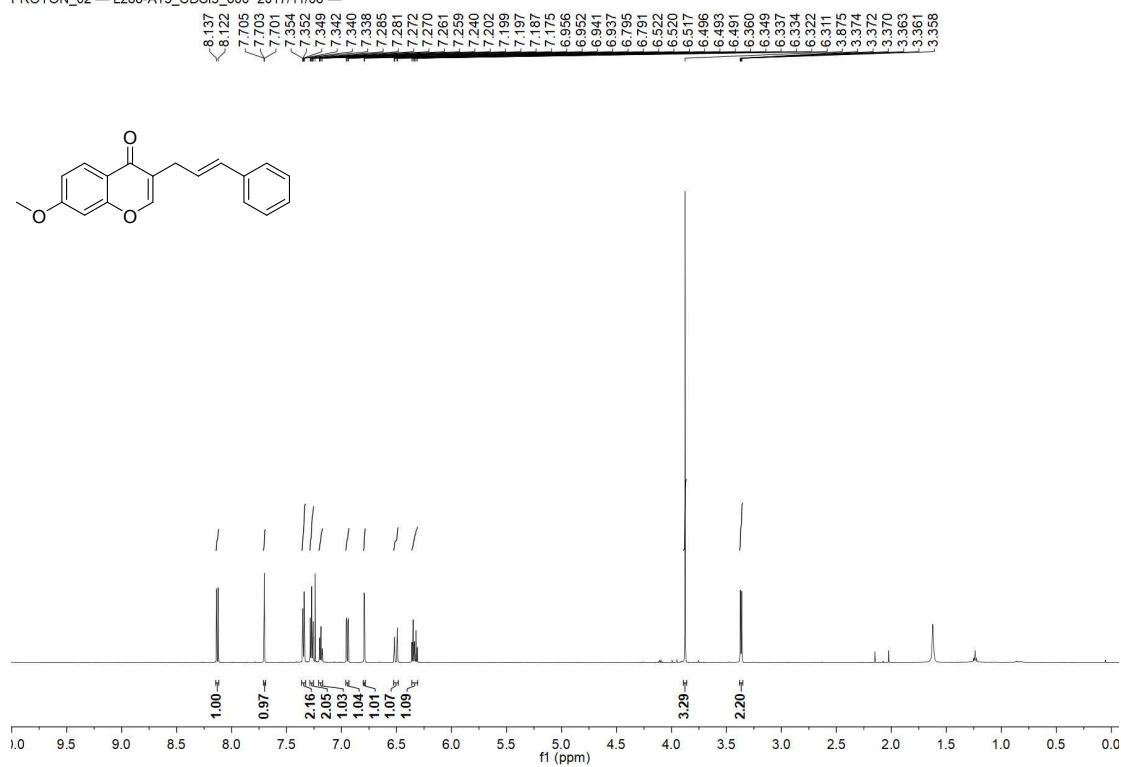

#### <sup>13</sup>C NMR

CARBON\_01 — L268-A15\_CDCl3\_600 2017/11/06 —

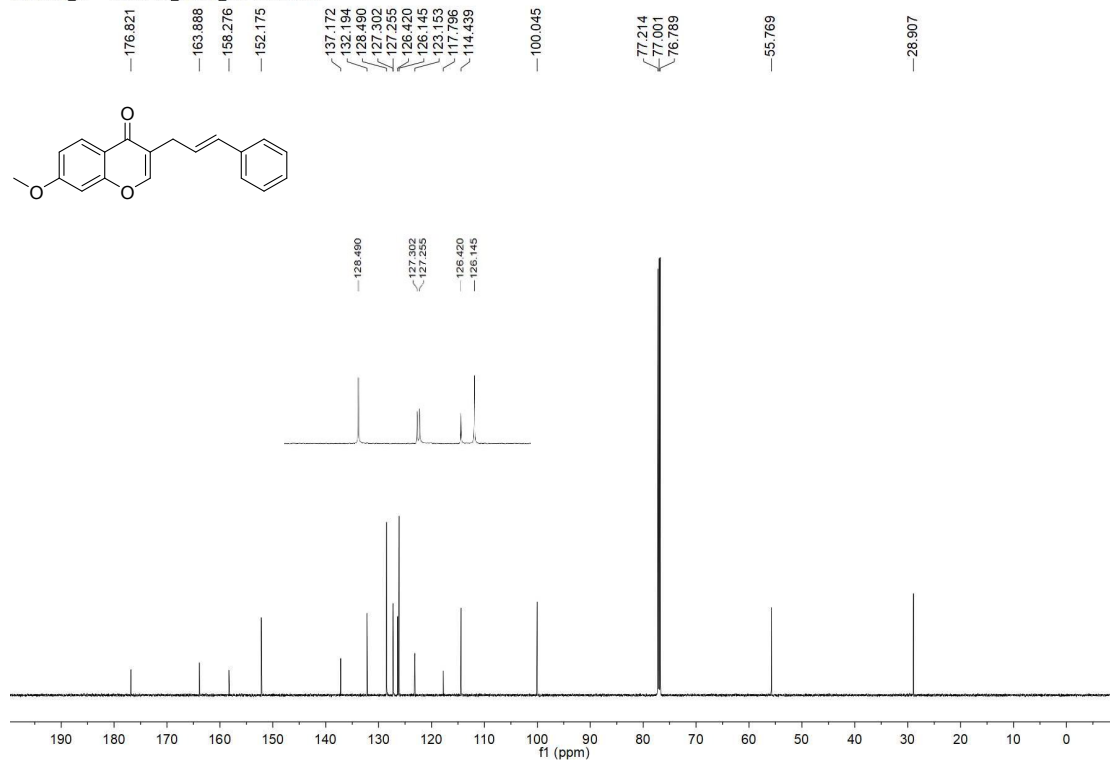

# (E)-3-(3-(p-Tolyl)allyl)-4H-chromen-4-one (5b)

## <sup>1</sup>H NMR

PROTON\_01 — L366\_A25\_CDCl3\_600 2018/01/26 —

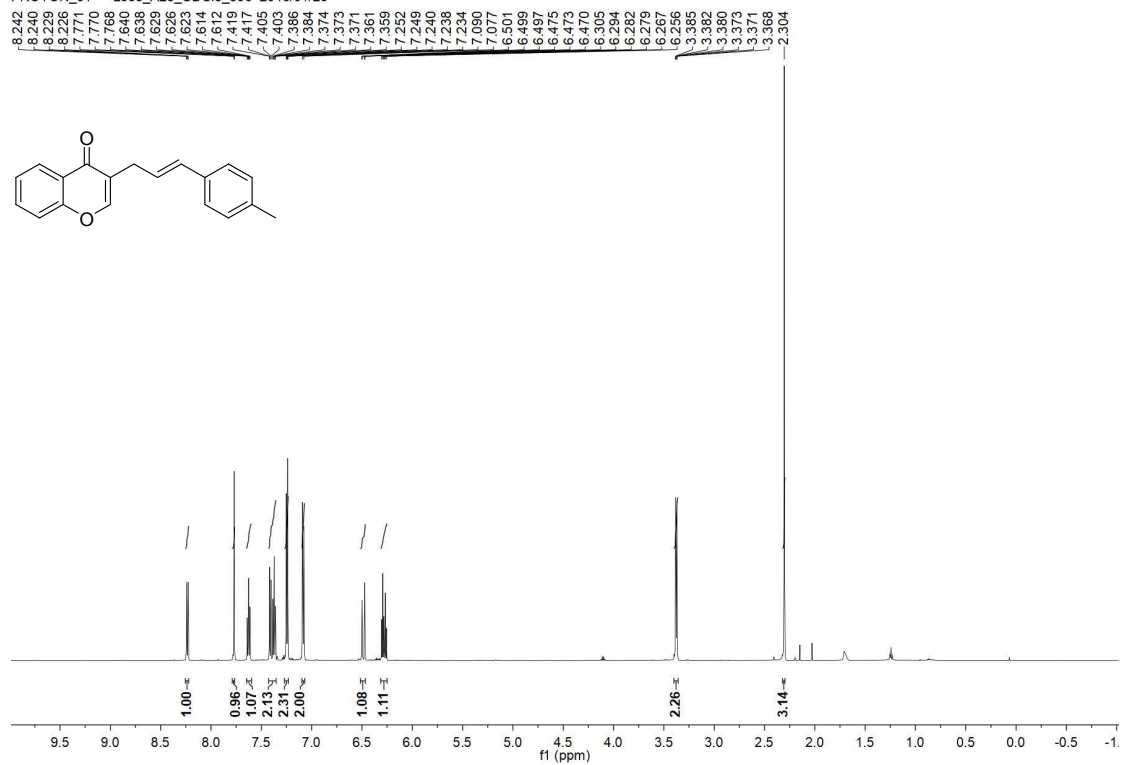

## <sup>13</sup>C NMR

CARBON\_01 — L366\_A25\_CDCl3\_600 2018/01/26 —

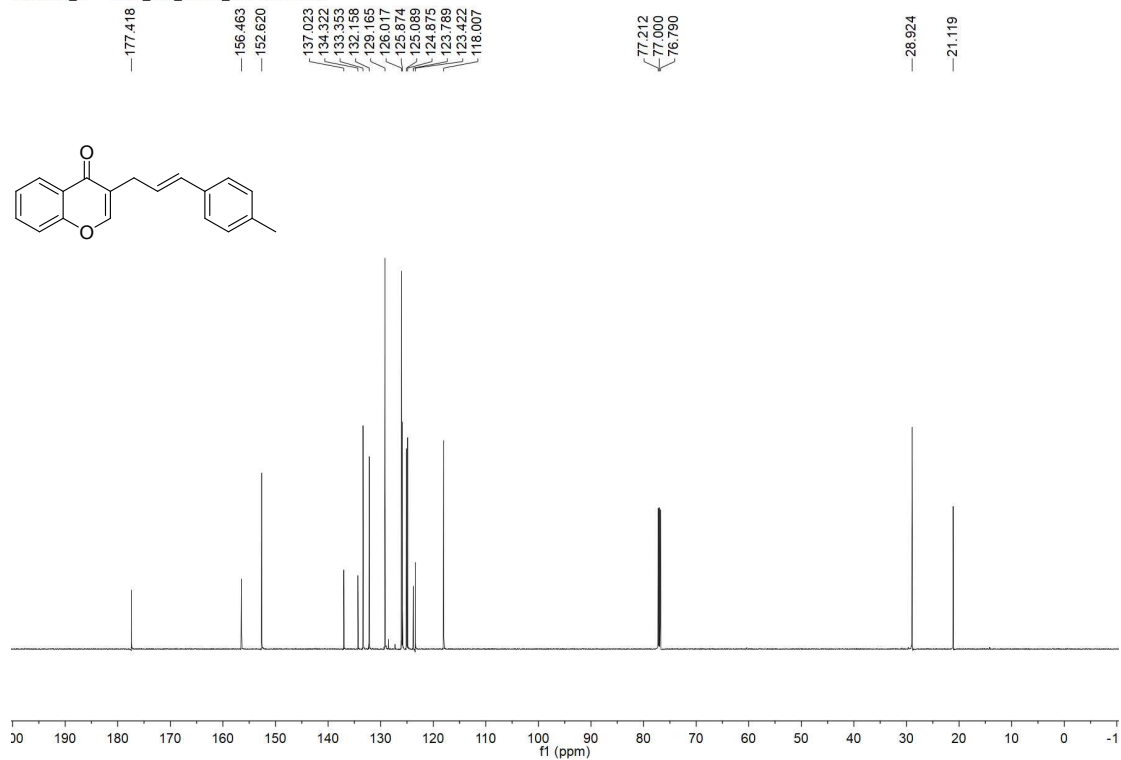



*(E)*-7-Methoxy-3-(3-(*p*-tolyl)allyl)-4*H*-chromen-4-one (**5c**)

<sup>1</sup>H NMR

PROTON\_01 — L306\_A51\_CDCl3\_600 2017/12/08 —

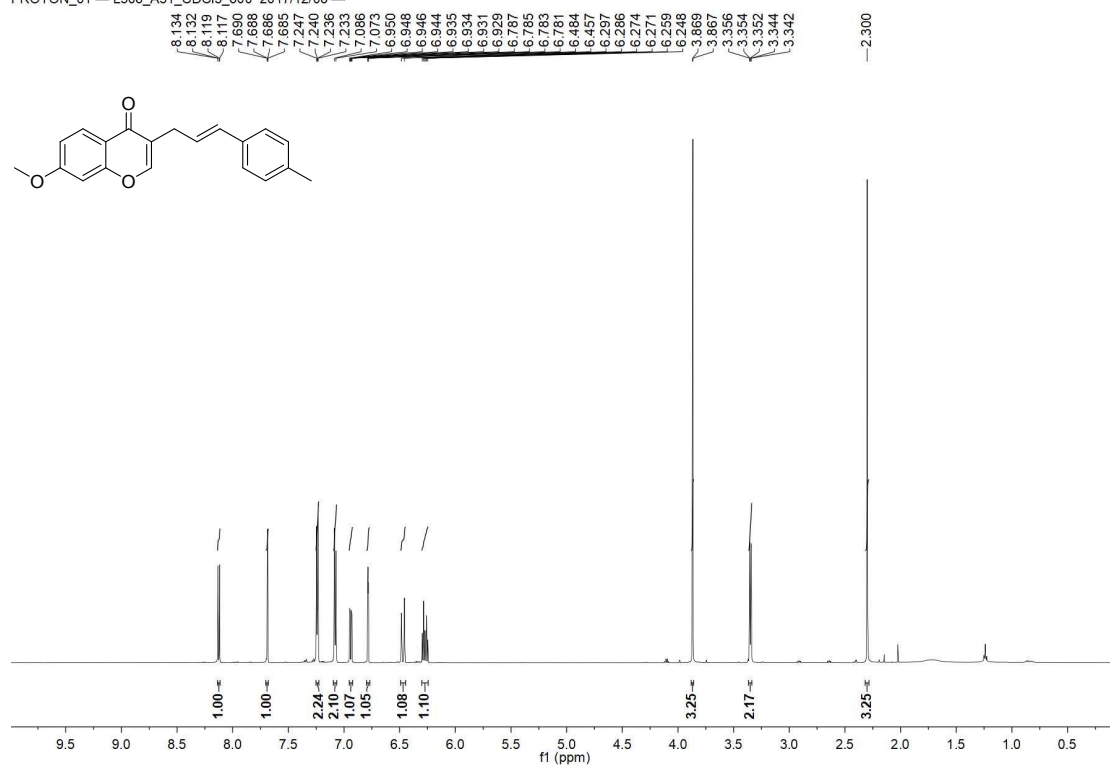

<sup>13</sup>C NMR

CARBON\_01 — L306\_A51\_CDCl3\_600 2017/12/08 —

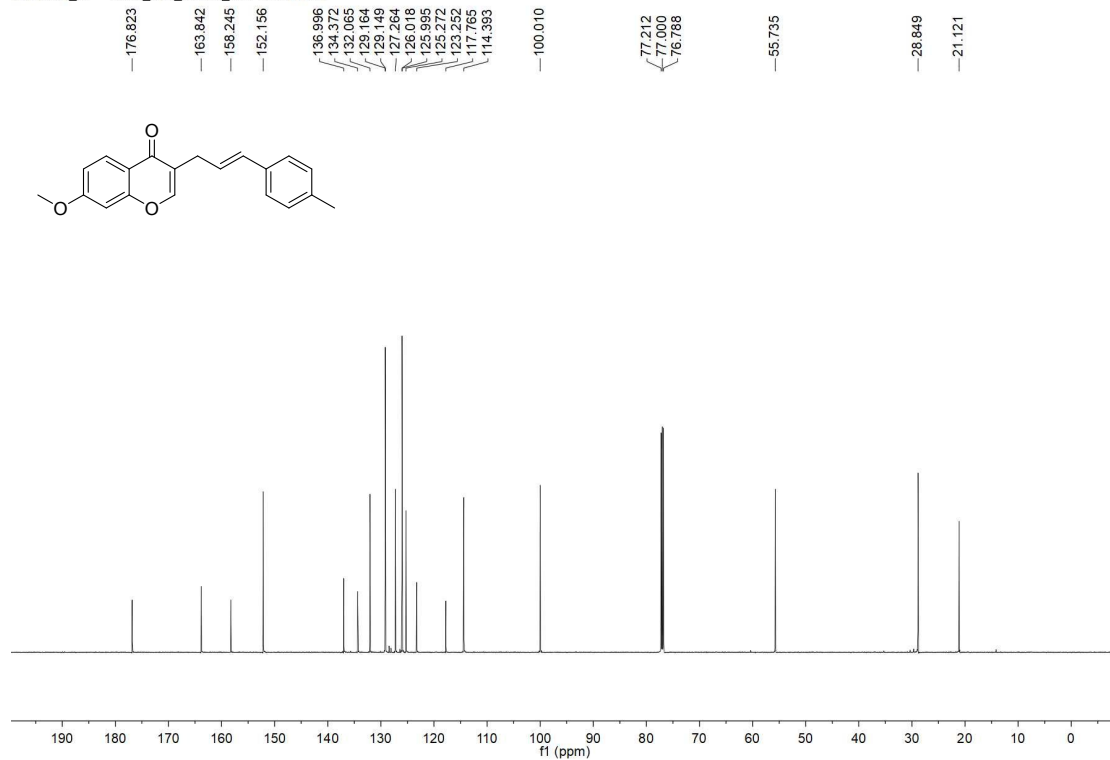

*(E)*-7-(3-Phenylprop-1-en-1-yl)-8H-[1,3]dioxolo[4,5-g]chromen-8-one (**5f**)

<sup>1</sup>H NMR

PROTON\_01 — J91\_A11-15\_CDCl3\_500 2019/01/19 —

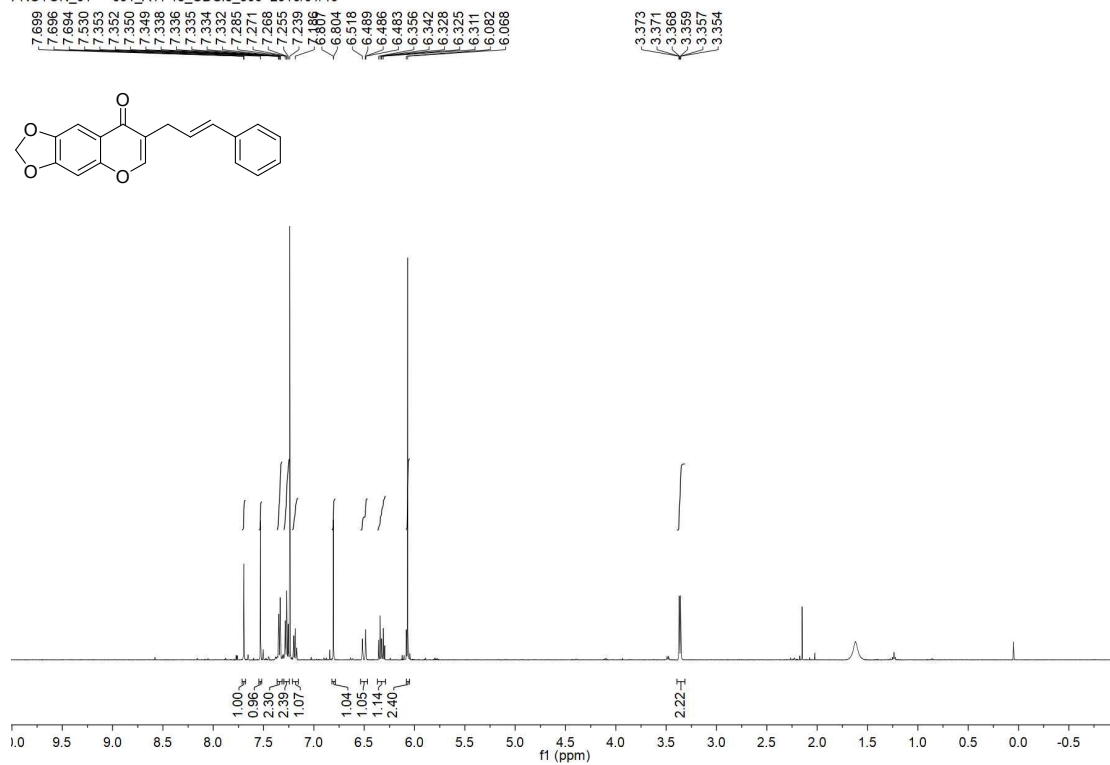

<sup>13</sup>C NMR

CARBON\_01 — J91\_A11-15\_CDCl3\_500 2019/01/19 —

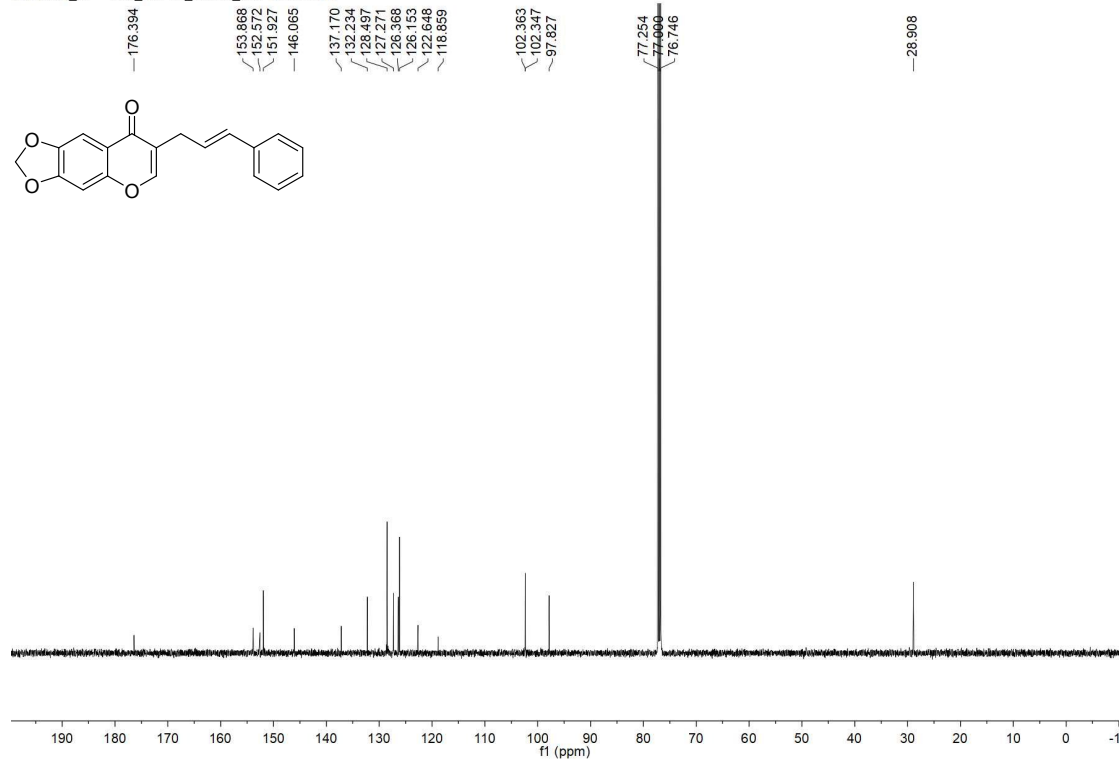

# 7-Methoxy-3-(1-(p-tolyl)propyl)-4H-chromen-4-one (2a)

## <sup>1</sup>H NMR

PROTON\_01 — L471\_A7-8\_CDCl3\_500 2018/05/04 —

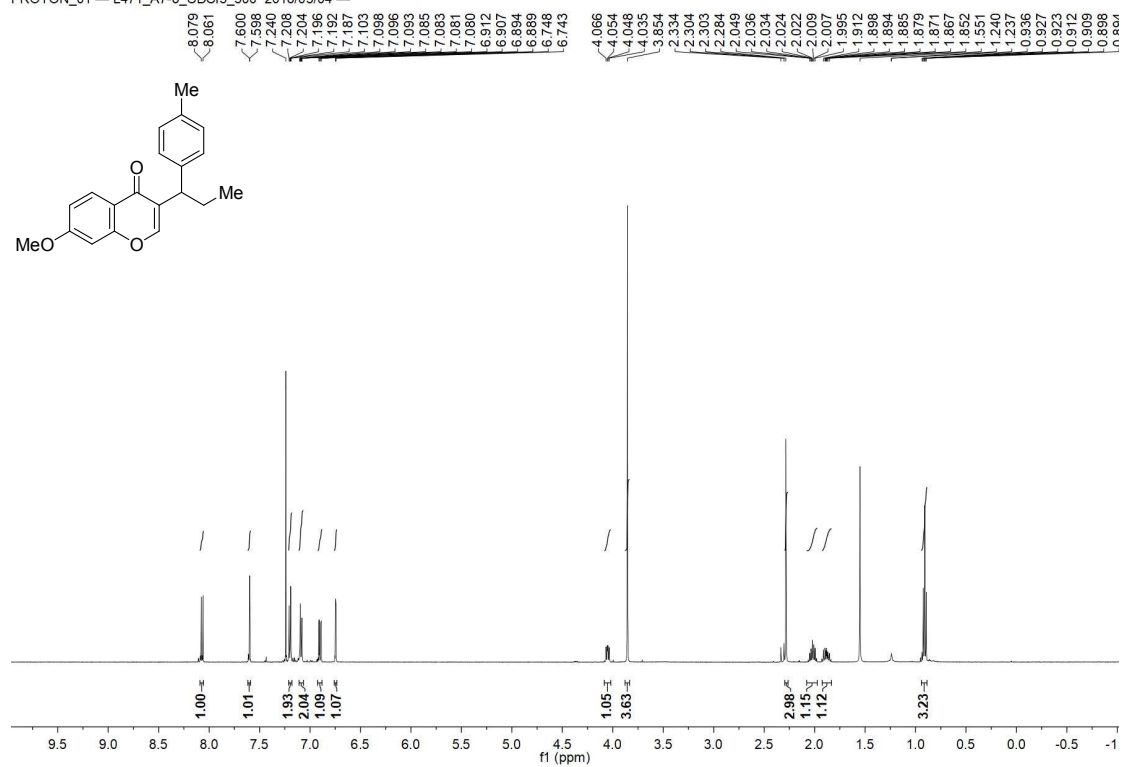

## <sup>13</sup>C NMR

CARBON\_02 — L471\_A7-8\_CDCl3\_500 2018/05/04 —

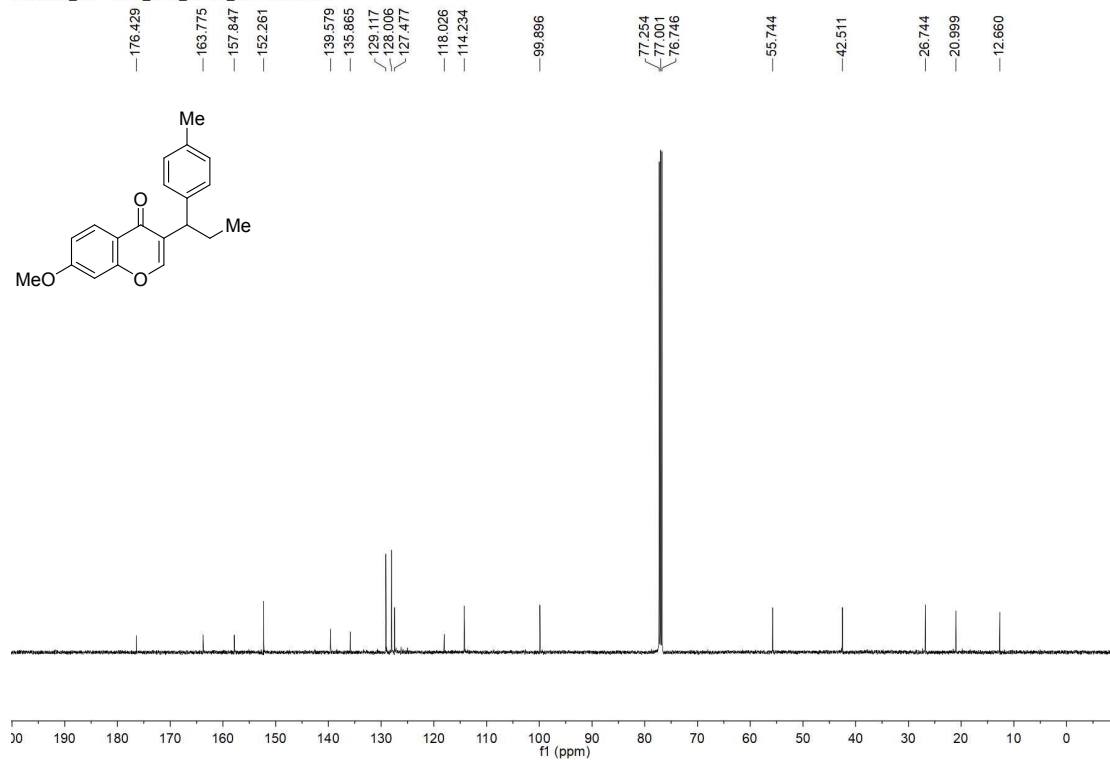

### 3-(1-(p-Tolyl)propyl)-4H-chromen-4-one (2b)

#### <sup>1</sup>H NMR

PROTON\_01 — J198\_A3-4\_CDCl3\_500 2018/05/15 —

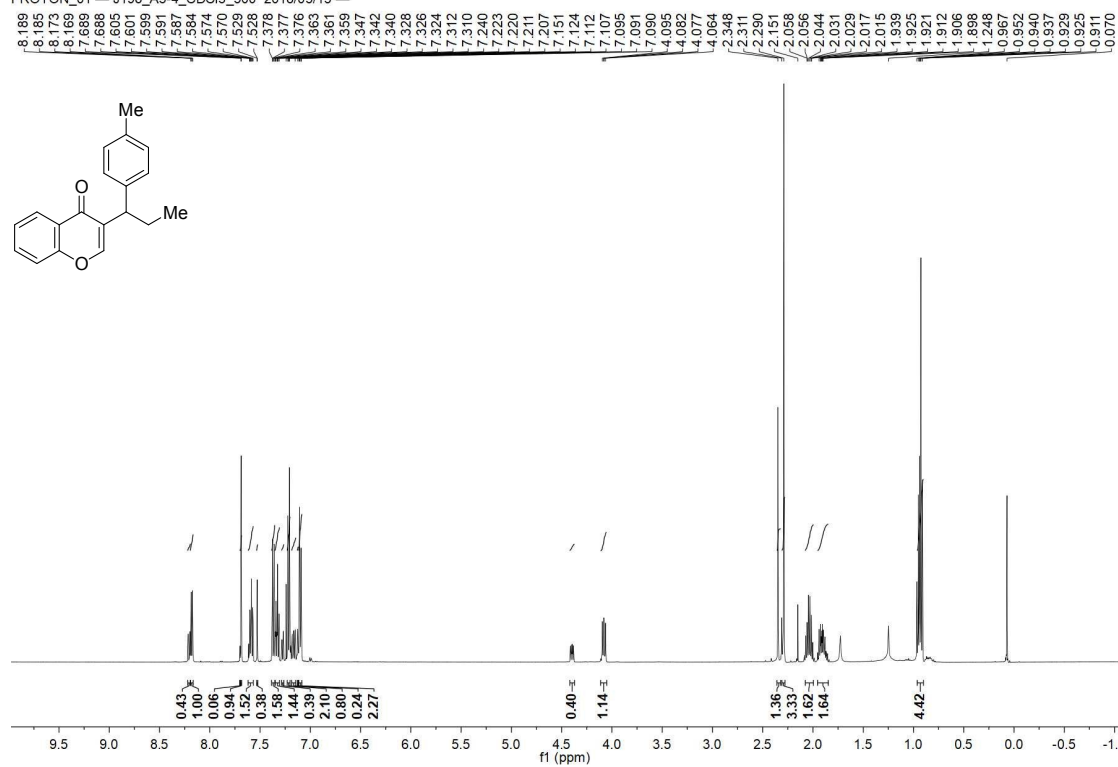

#### <sup>13</sup>C NMR

CARBON\_01 — J198\_A3-4\_CDCl3\_500 2018/05/15 —

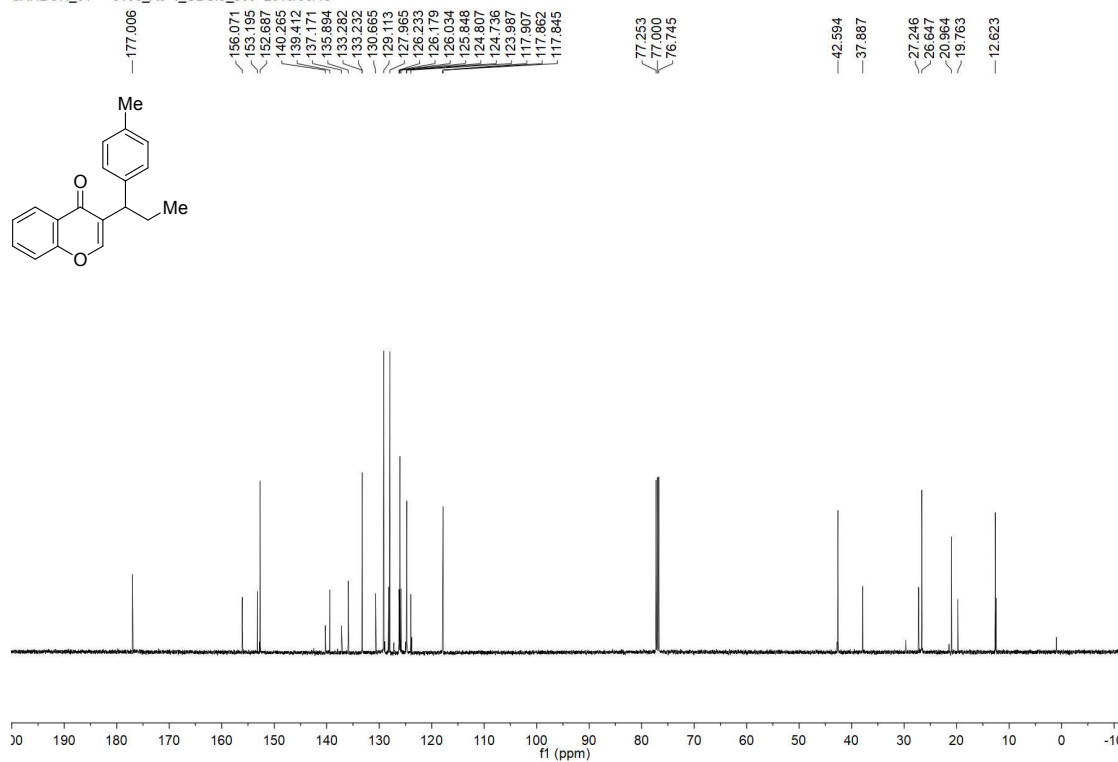

### 3-(1-(*o*-Tolyl)propyl)-4H-chromen-4-one (2b')

<sup>1</sup>H NMR

PROTON\_01 — J232\_A12-14\_A8-12\_CDCl3\_500 2019/01/15 —

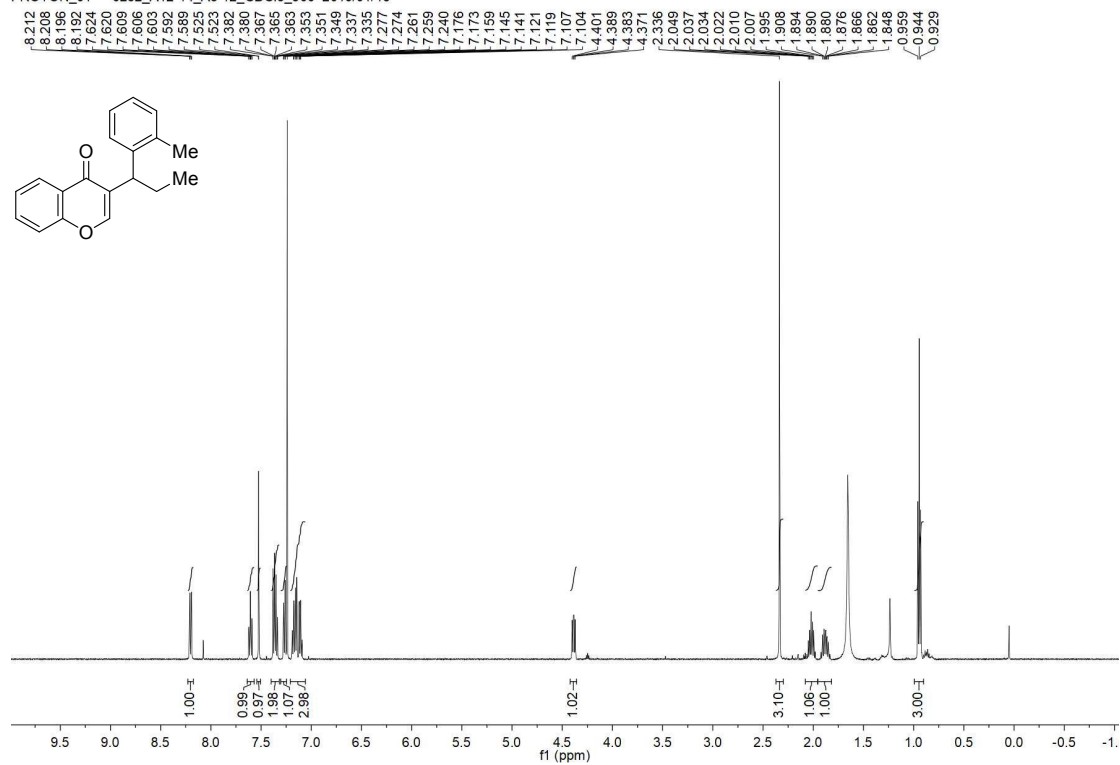

<sup>13</sup>C NMR

CARBON\_01 — J232\_A12-14\_A8-12\_CDCl3\_500 2019/01/15 —

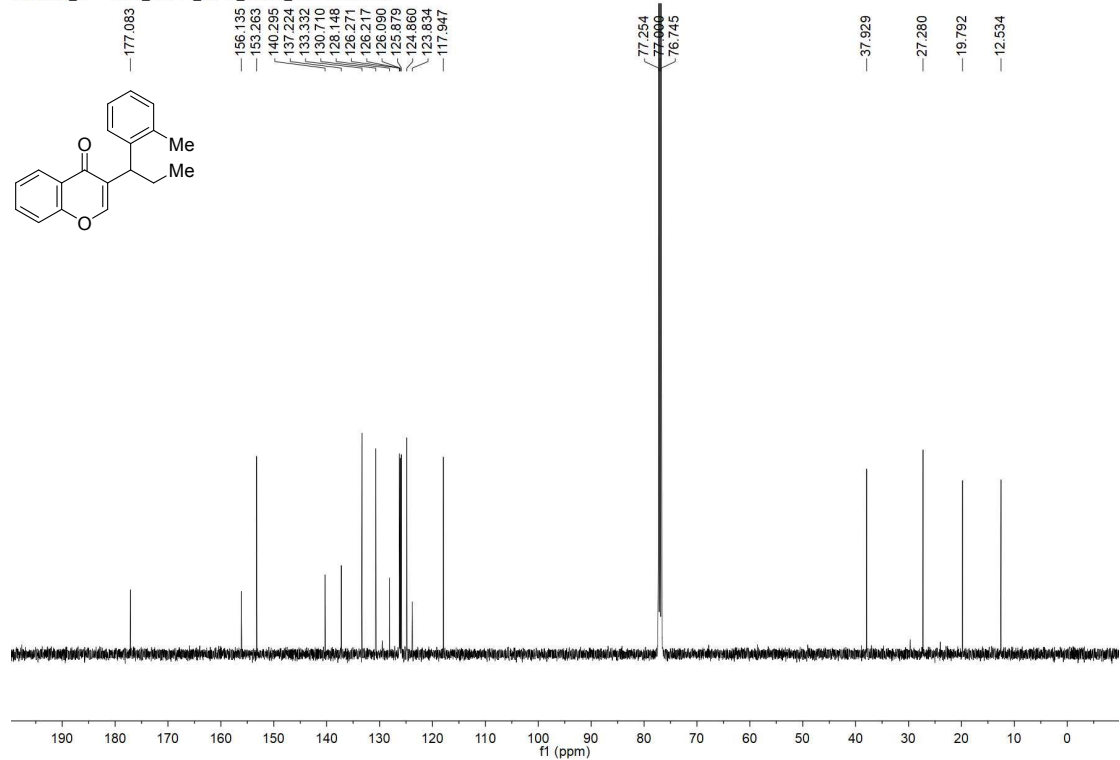



# 6-Chloro-3-(1-(p-tolyl)propyl)-4H-chromen-4-one (2d)

## <sup>1</sup>H NMR

PROTON\_01 — J202\_A1-2\_CDCl3\_500 2018/05/25 —

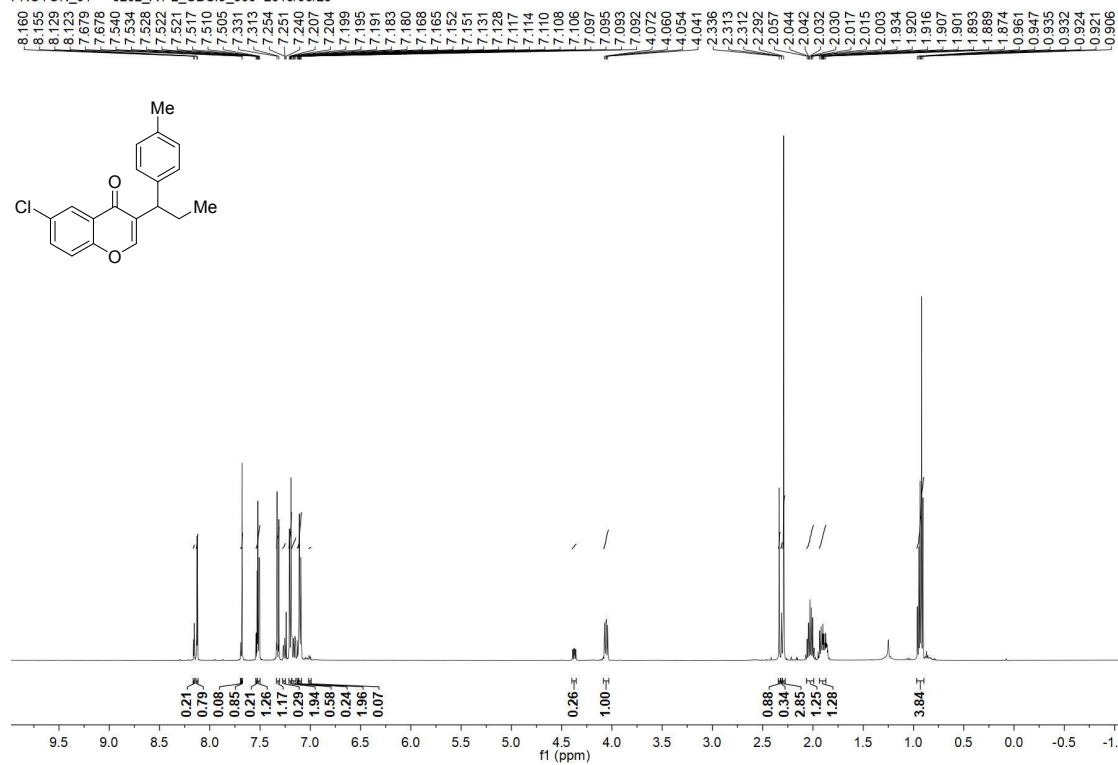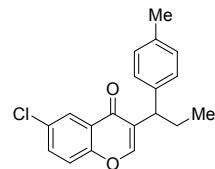

## <sup>13</sup>C NMR

CARBON\_01 — J202\_A1-2\_CDCl3\_500 2018/05/25 —

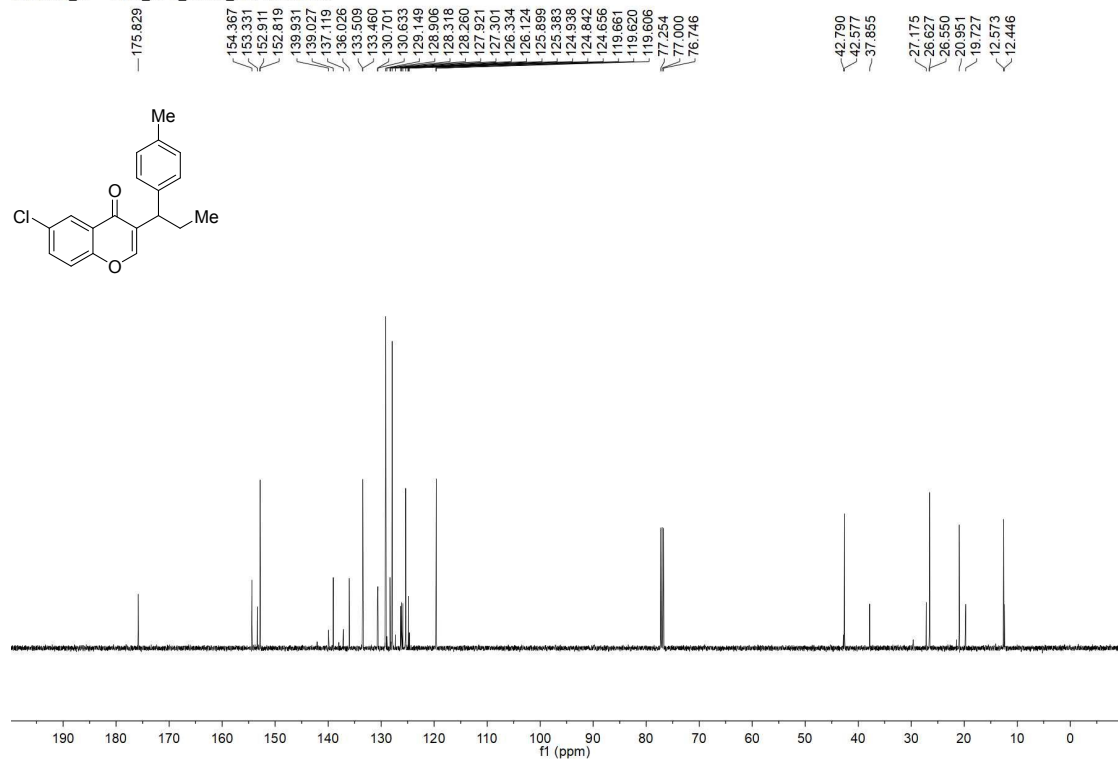

3-(1-(4-Hydroxyphenyl)propyl)-7-methoxy-4H-chromen-4-one (2e).

<sup>1</sup>H NMR

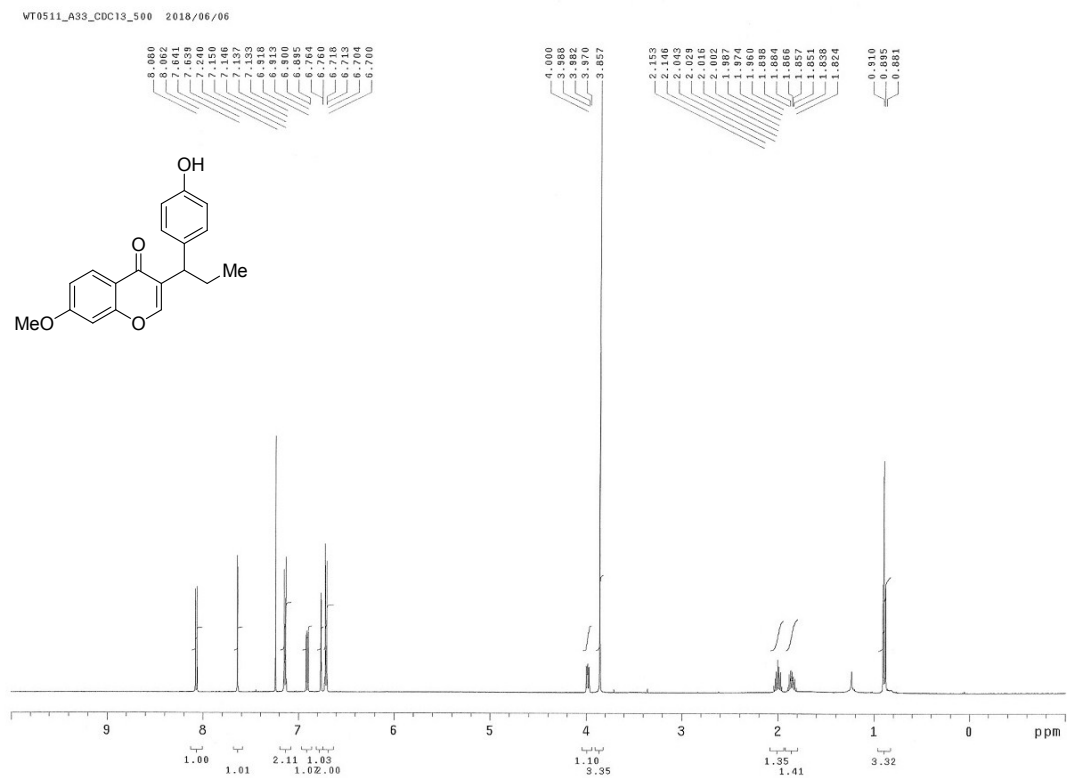

<sup>13</sup>C NMR

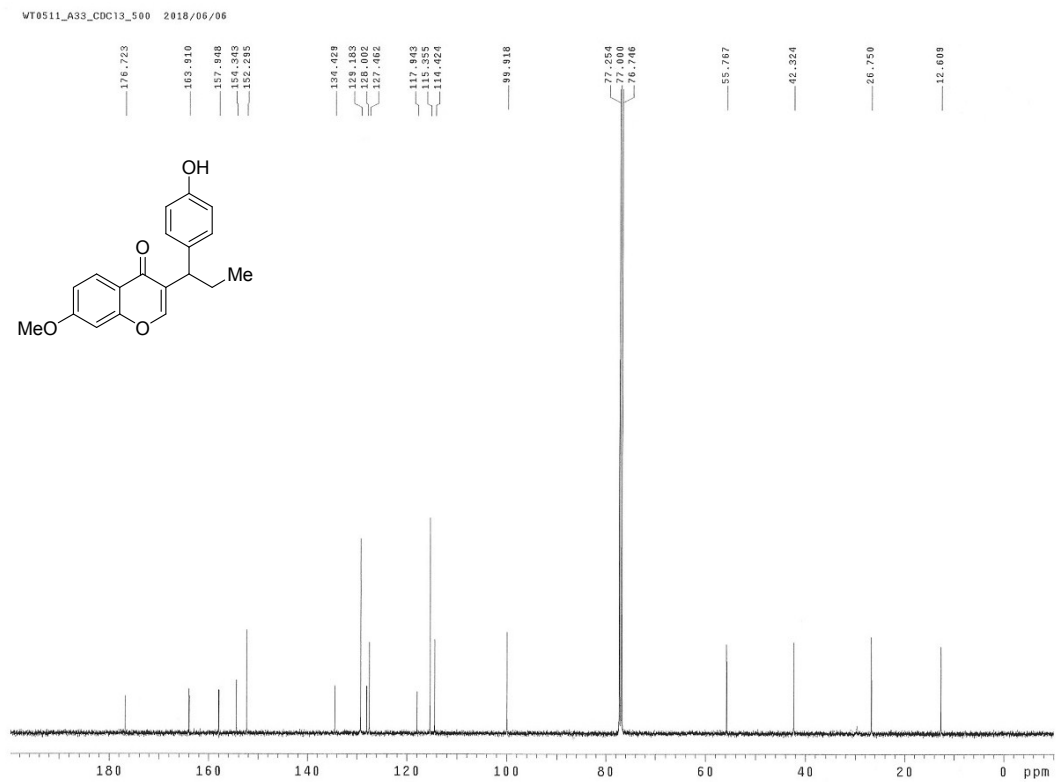



3-(1-(2-Hydroxyphenyl)propyl)-7-methoxy-4H-chromen-4-one (2e').

<sup>1</sup>H NMR

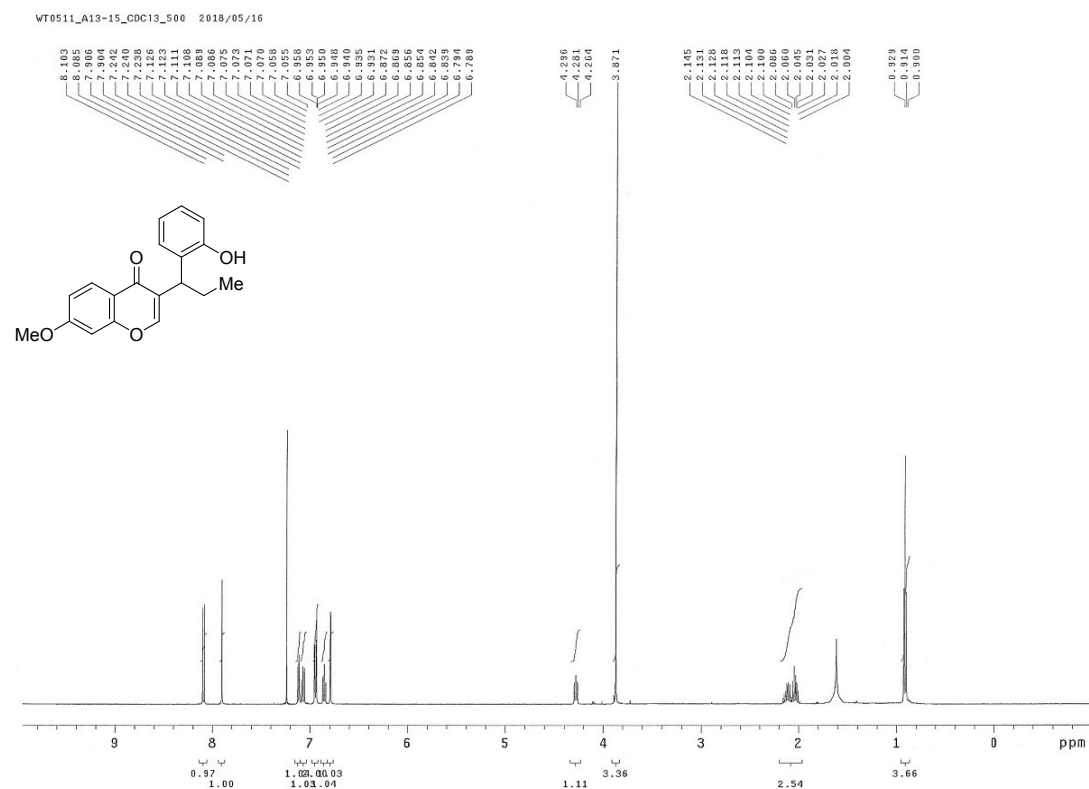

<sup>13</sup>C NMR

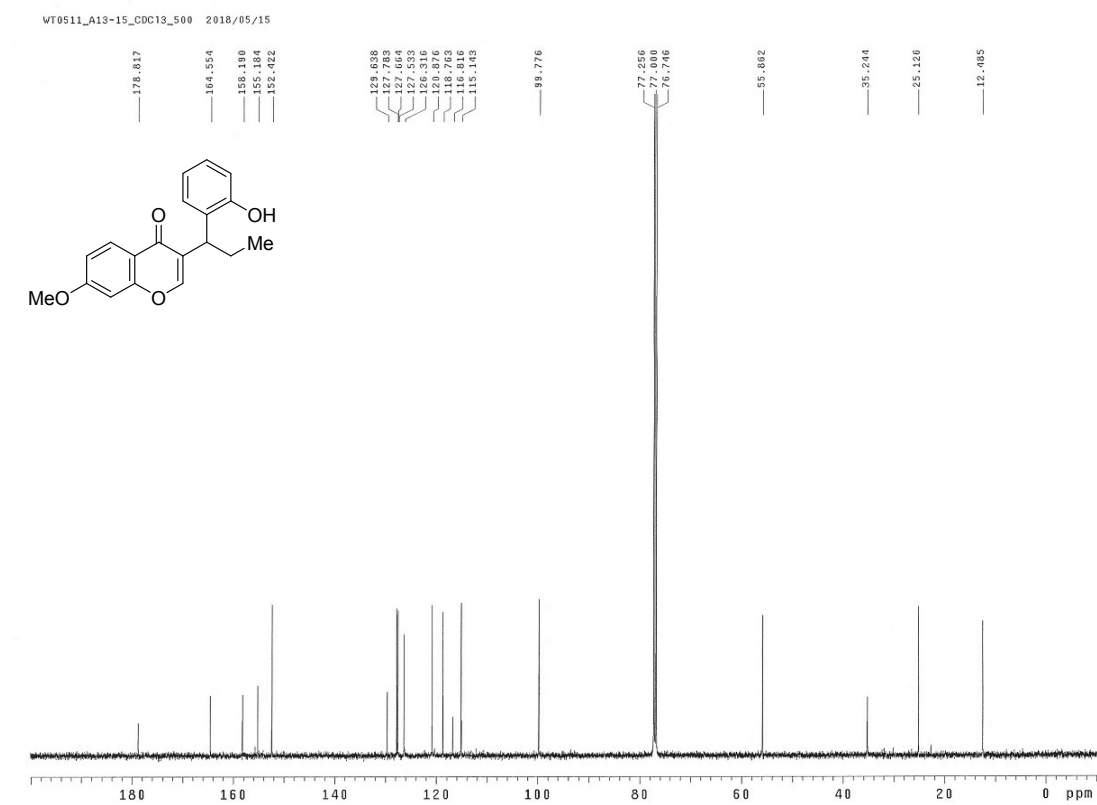

# 7-Methoxy-3-(1-(naphthalen-1-yl)propyl)-4H-chromen-4-one (2f)

## <sup>1</sup>H NMR

PROTON\_01 — L503\_A24-28\_A7-14\_CDCl3\_500 2019/01/15 —

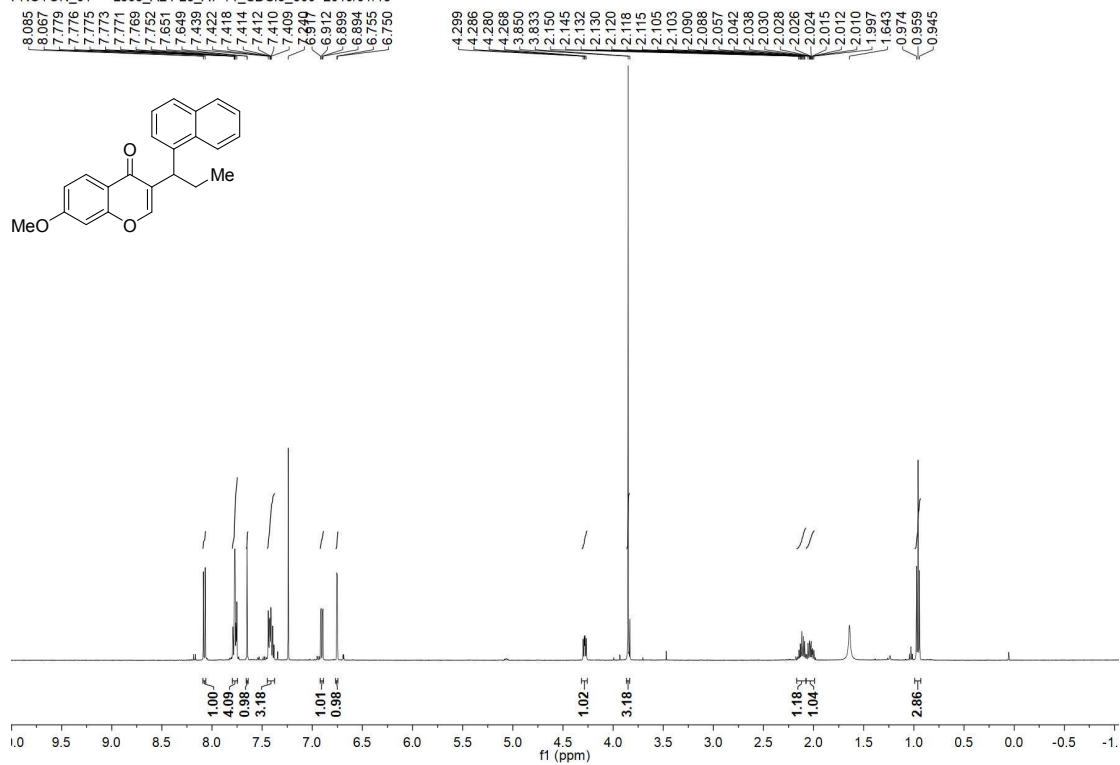

## <sup>13</sup>C NMR

CARBON\_01 — L503\_A24-28\_A7-14\_CDCl3\_500 2019/01/15 —

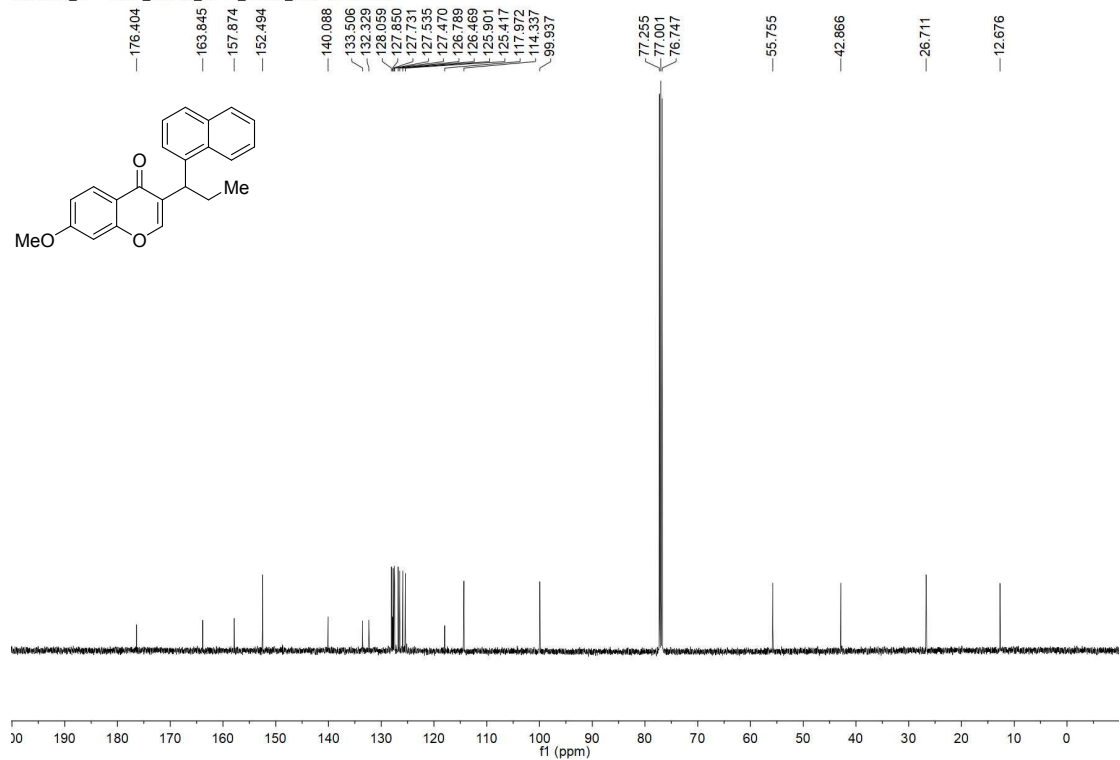

# 7-Methoxy-3-(1-(naphthalen-2-yl)propyl)-4H-chromen-4-one (2f')

## <sup>1</sup>H NMR

PROTON\_01 — L503\_A14-18\_CDCl3\_500 2018/06/22 —

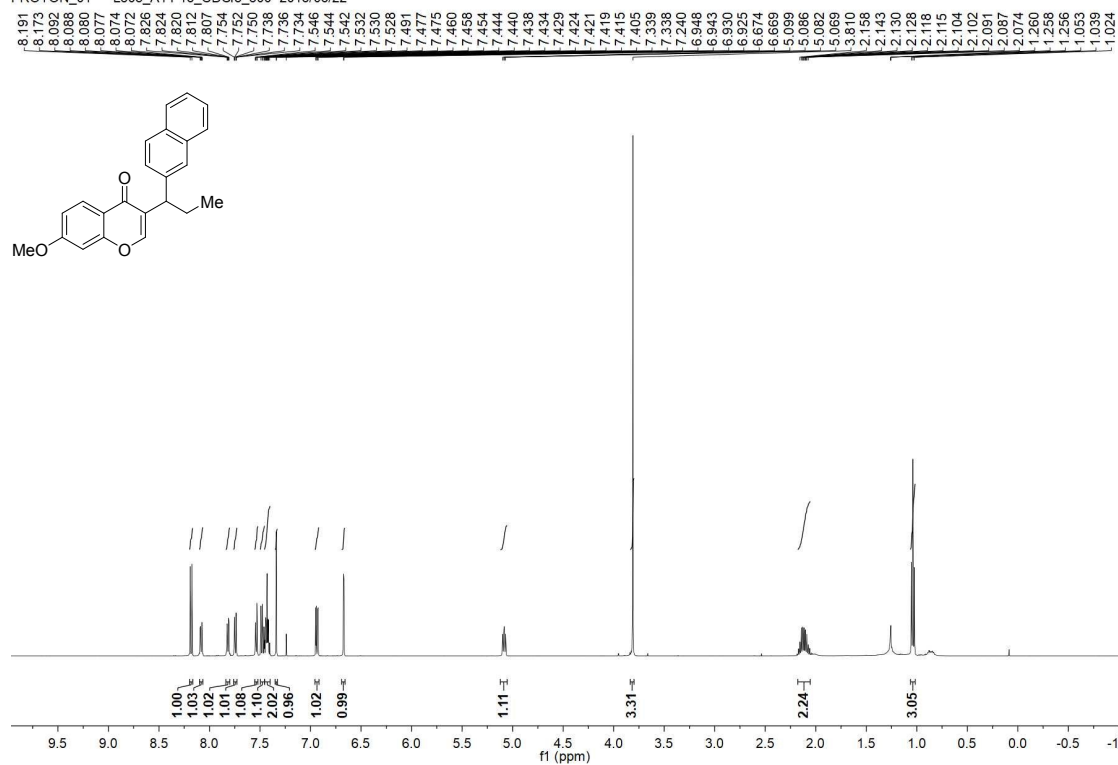

## <sup>13</sup>C NMR

CARBON\_01 — L503\_A14-18\_CDCl3\_500 2018/06/22 —

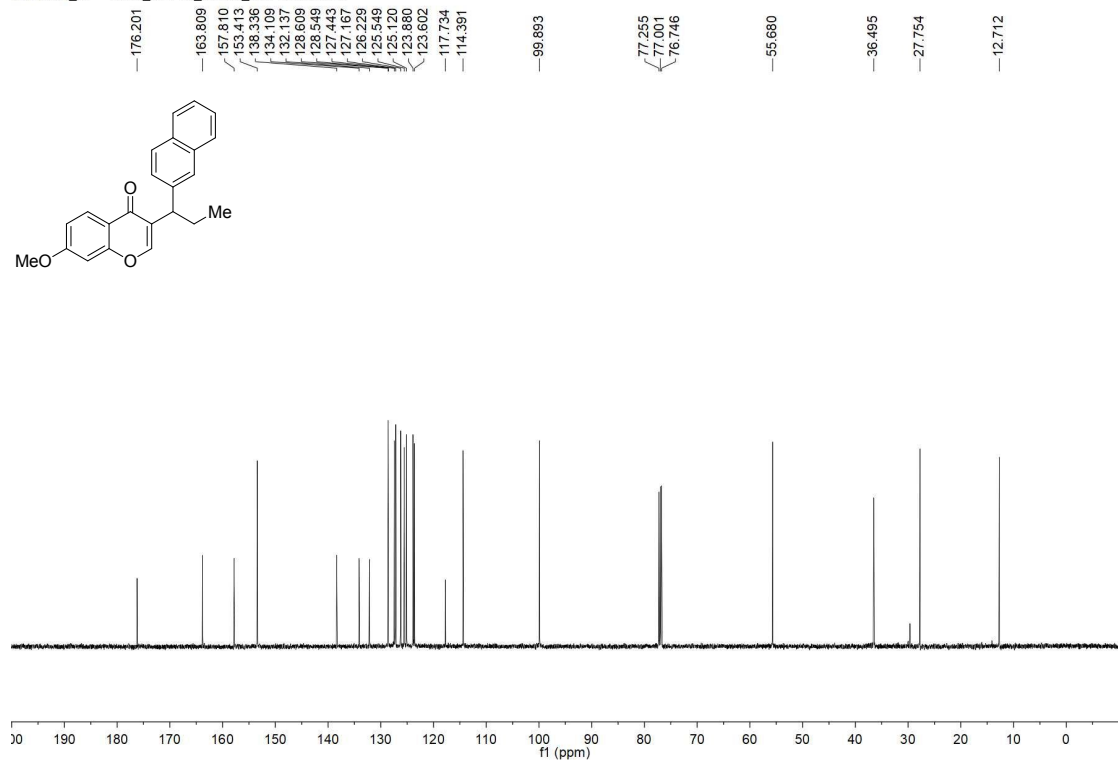



### 3-(1-([1,1'-Biphenyl]-4-yl)propyl)-7-methoxy-4H-chromen-4-one (2h)

#### <sup>1</sup>H NMR

PROTON\_01 — L489B\_A11\_CDCI3\_500 2018/06/22 —

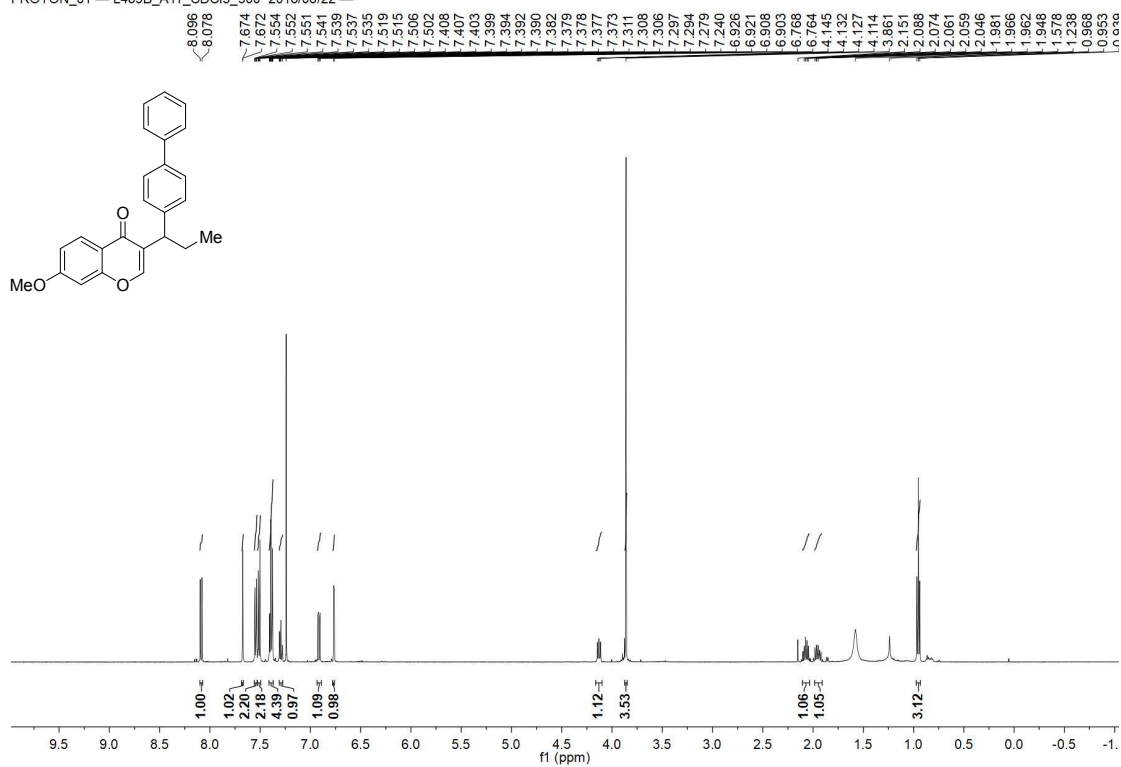

#### <sup>13</sup>C NMR

CARBON\_01 — L489B\_A11\_CDCI3\_500 2018/06/22 —

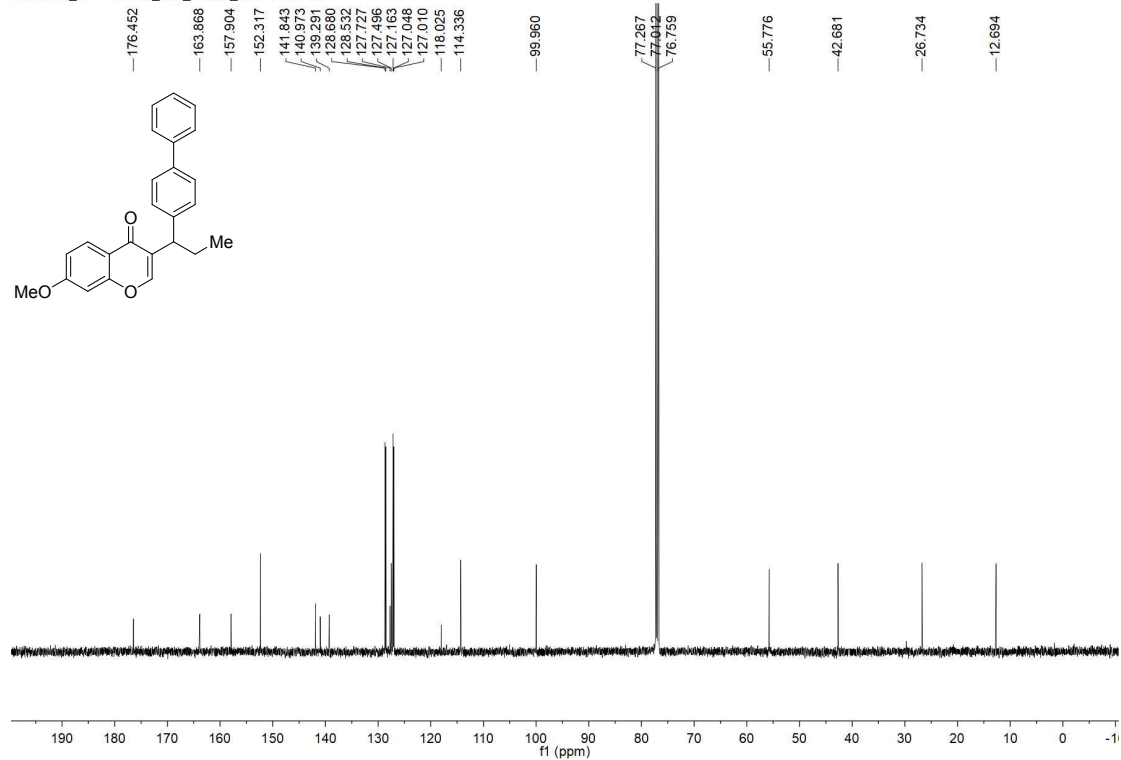

# 7-Methoxy-3-(1-(4-oxochroman-6-yl)propyl)-4H-chromen-4-one (**2i**)

## <sup>1</sup>H NMR

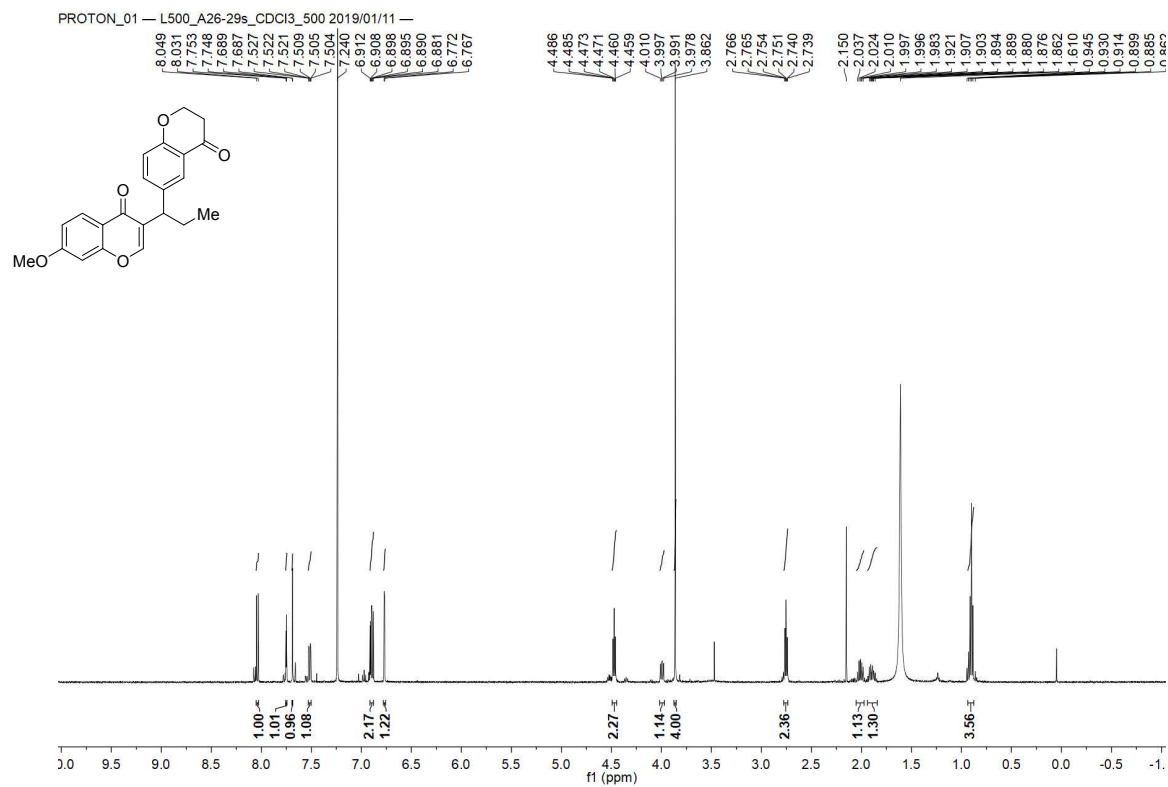

## <sup>13</sup>C NMR

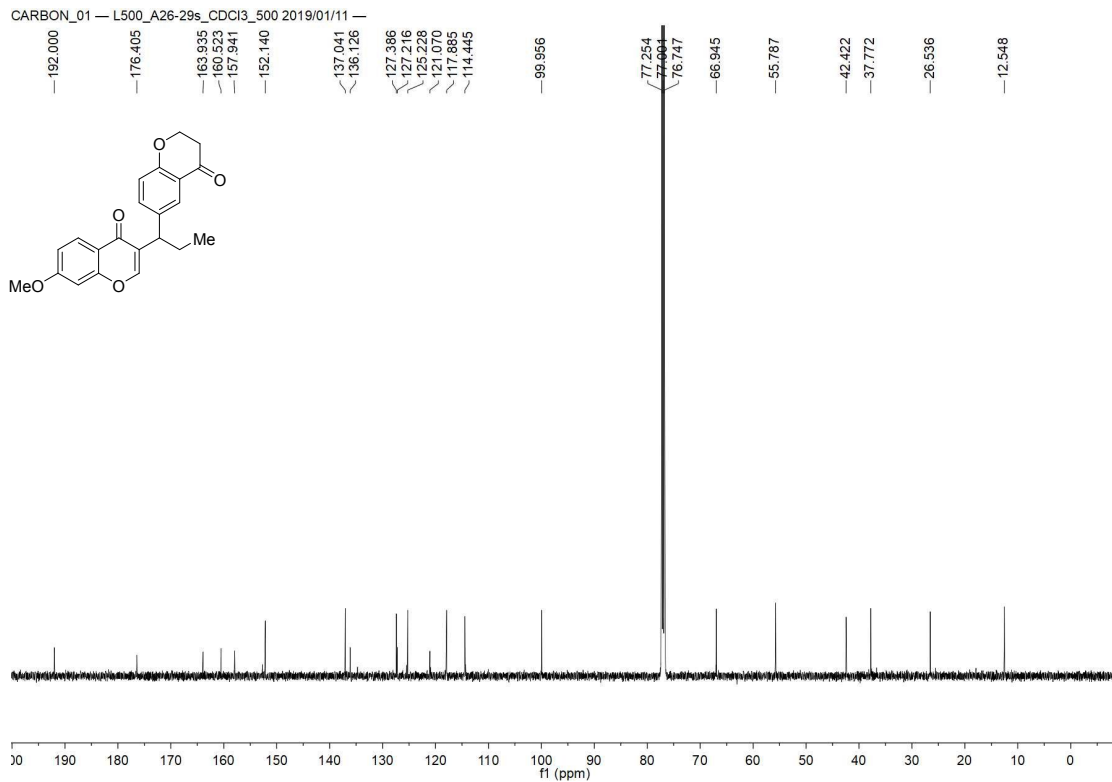







# 3-(1-(4-Acetyl-3-hydroxyphenyl)propyl)-7-methoxy-4H-chromen-4-one (21)

## <sup>1</sup>H NMR

PROTON\_01 — L525\_A13-17\_CDCl3\_500 2018/06/06 —

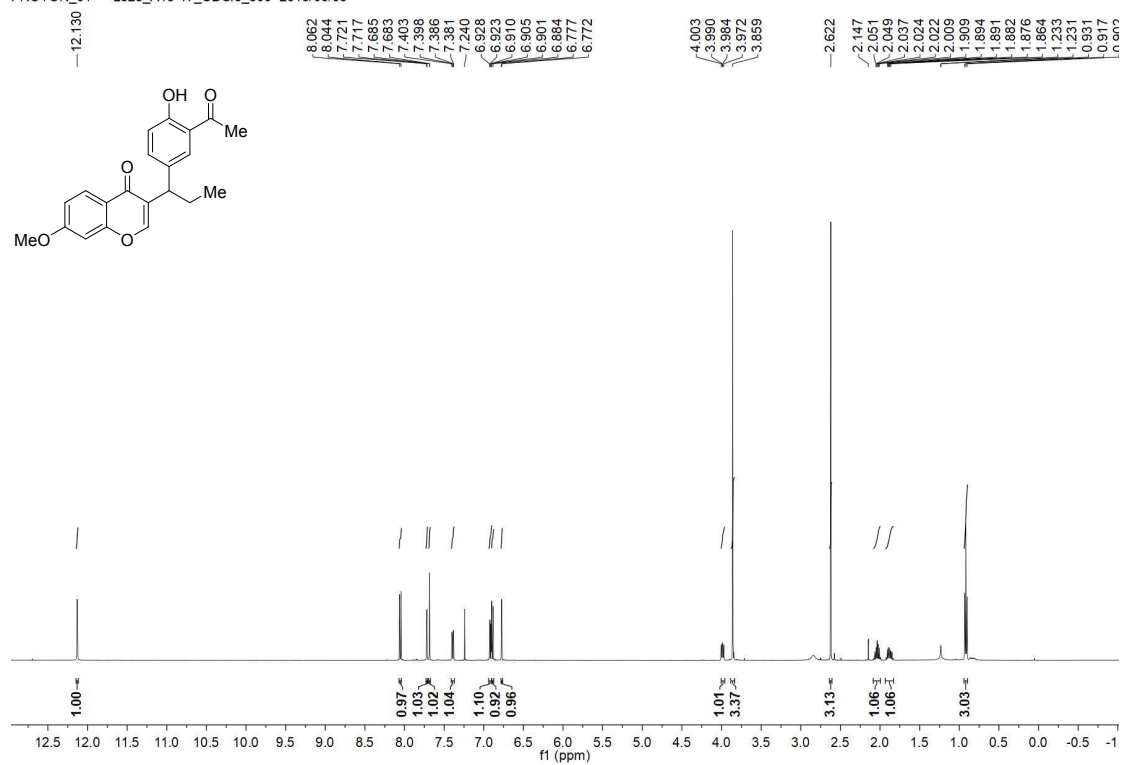

## <sup>13</sup>C NMR

CARBON\_01 — L525\_A13-17\_CDCl3\_500 2018/06/06 —

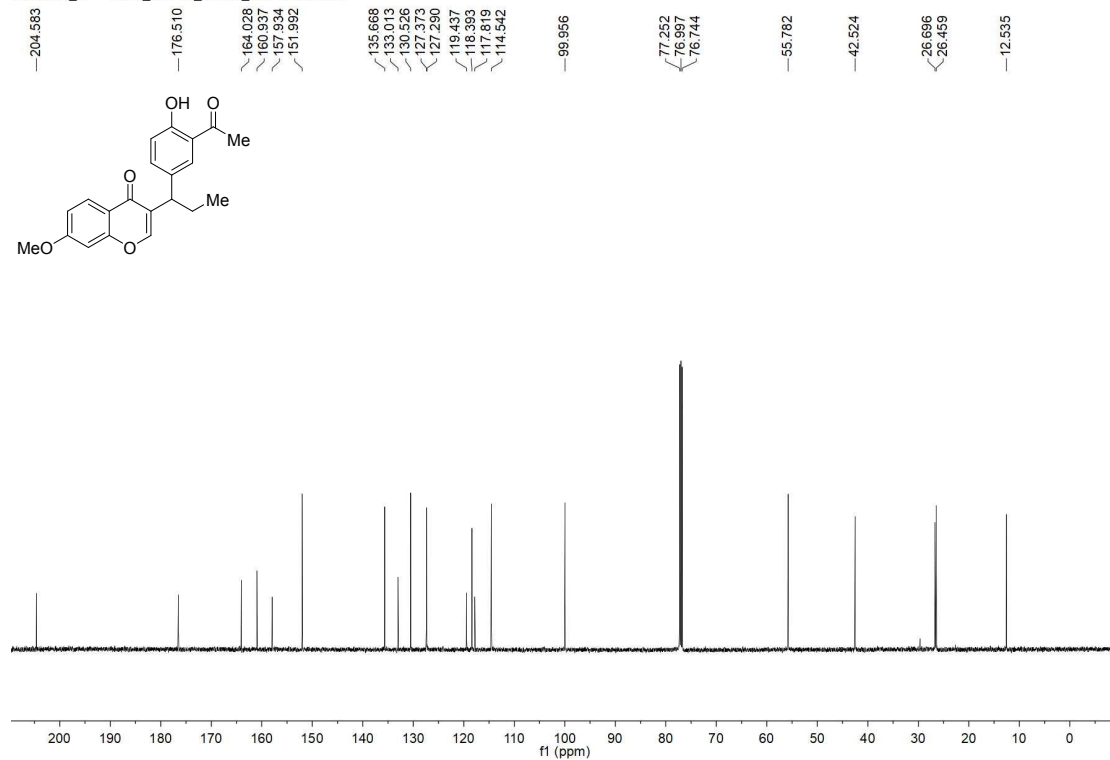

### 3-(1-(3-Acetyl-2-hydroxyphenyl)propyl)-7-methoxy-4H-chromen-4-one (21')

<sup>1</sup>H NMR

PROTON\_01 — L525\_A8-10\_CDCl3\_500 2018/06/06 —

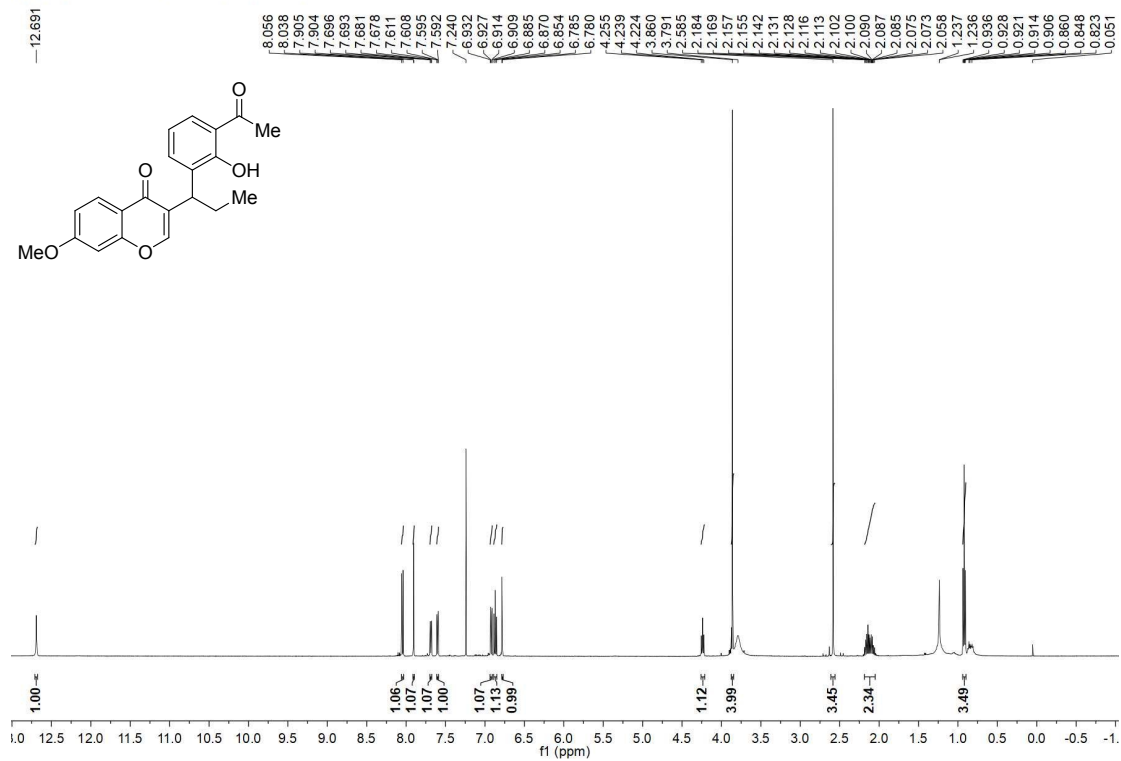

<sup>13</sup>C NMR

CARBON\_01 — L525\_A8-10\_CDCl3\_500 2018/06/06 —

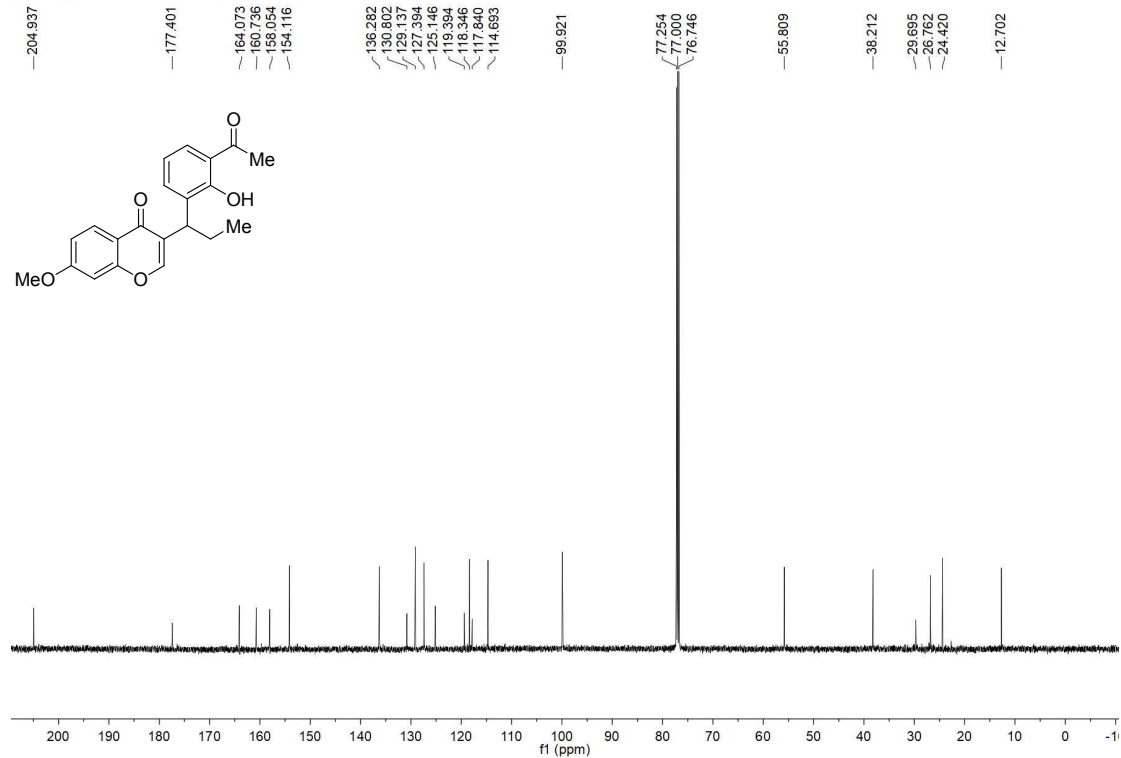

# 4-(7-Methoxy-4-oxo-4H-chromen-3-yl)-4-(p-tolyl)butanoic acid (2m)

## <sup>1</sup>H NMR

L953\_A23\_CDCl3\_500 2018/07/03

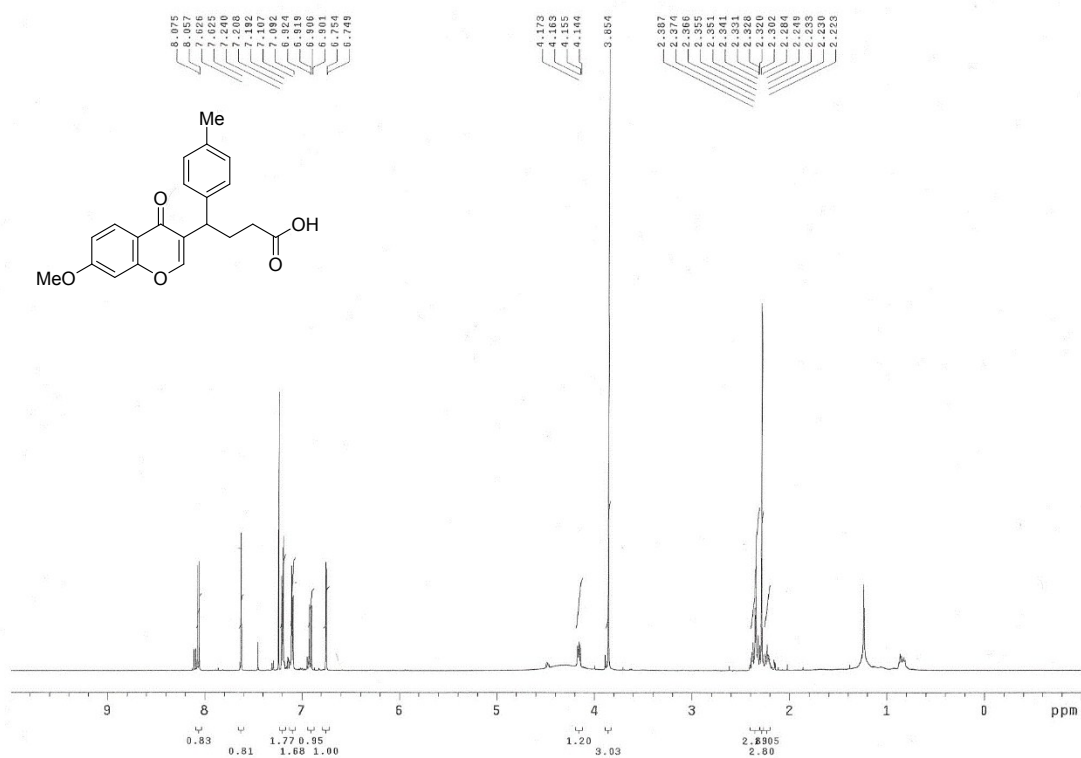

## <sup>13</sup>C NMR

L953\_A23\_CDCl3\_500 2018/07/03

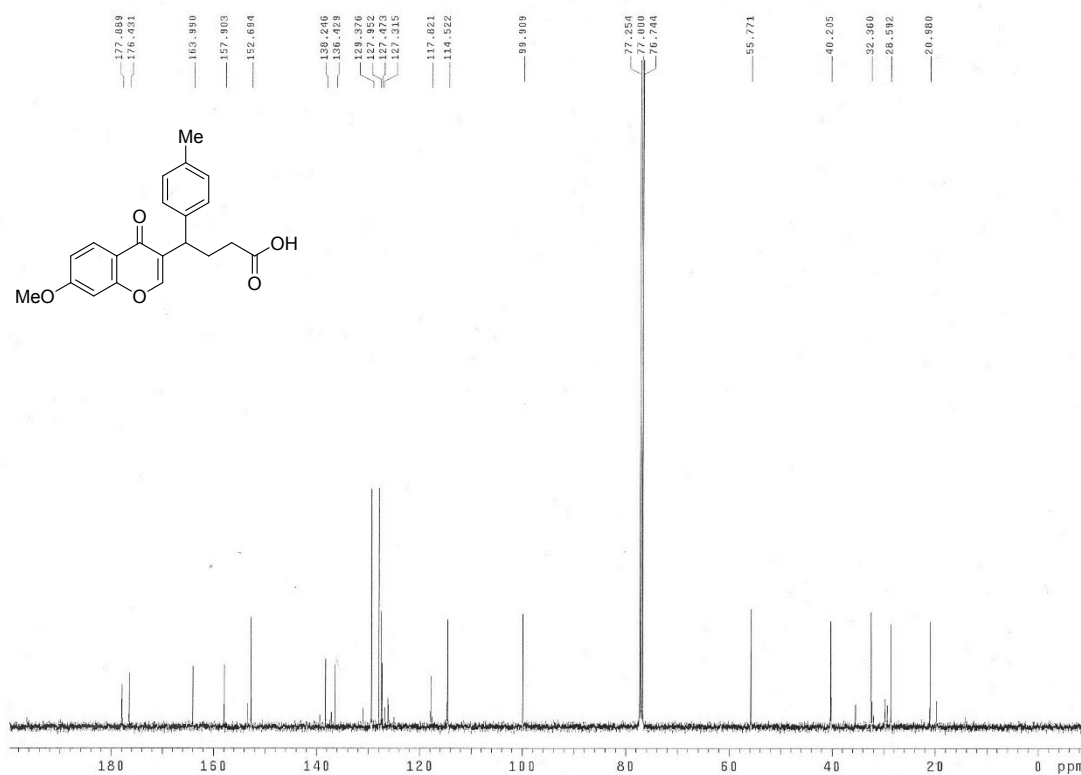

### 3-(1-(p-Tolyl)butyl)-4H-chromen-4-one (4a)

#### <sup>1</sup>H NMR

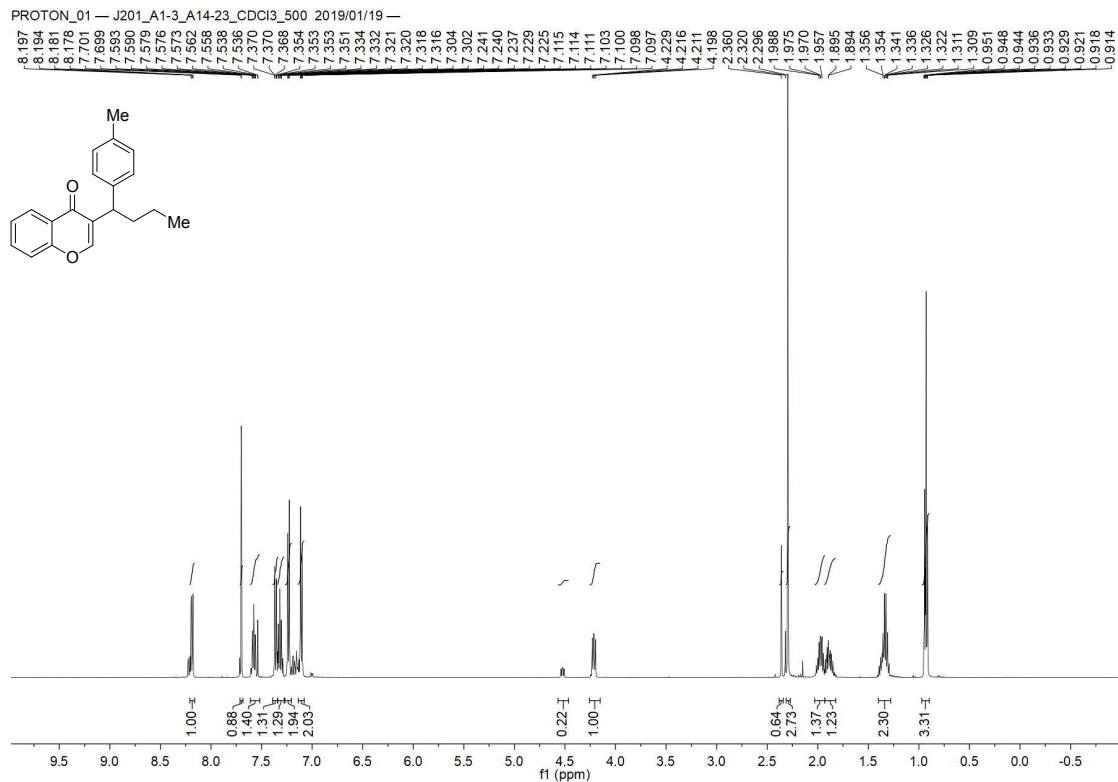

#### <sup>13</sup>C NMR

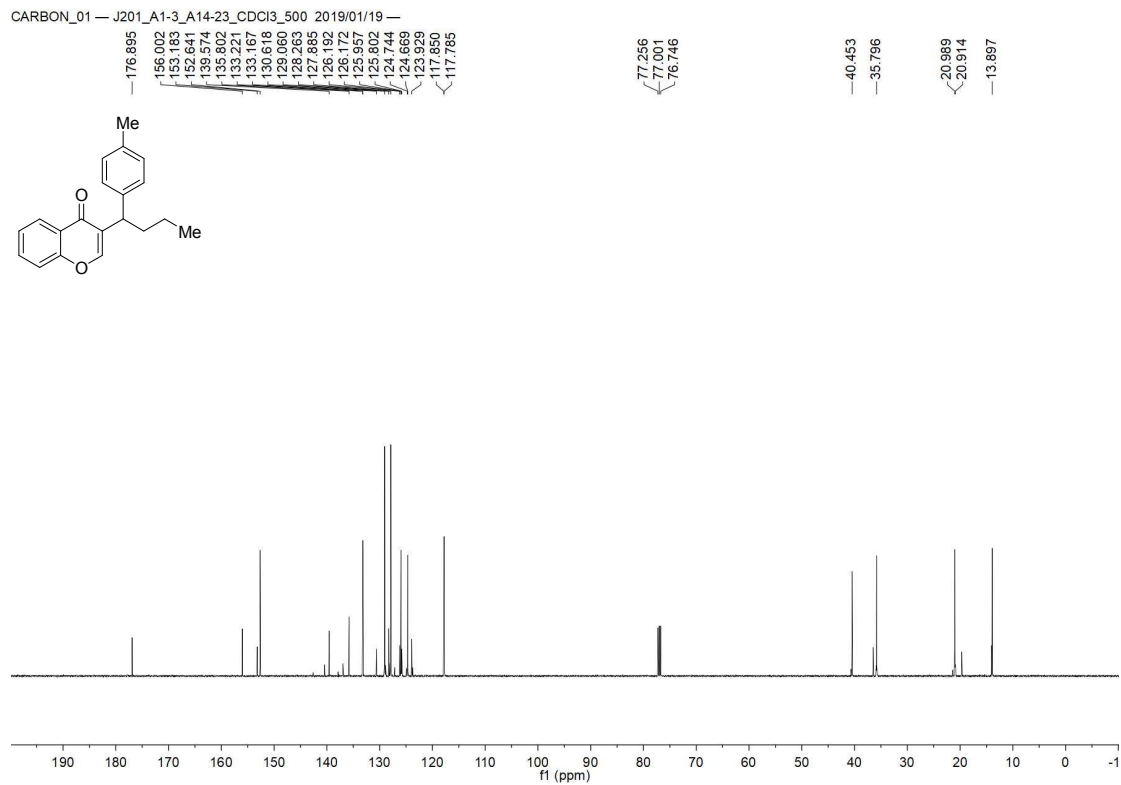

# 7-Methoxy-3-(1-(2,4-dimethylphenyl)butyl)-4H-chromen-4-one (**4b**)

## <sup>1</sup>H NMR

PROTON\_01 — J294\_A9\_CDCl3\_500 2018/08/16 —

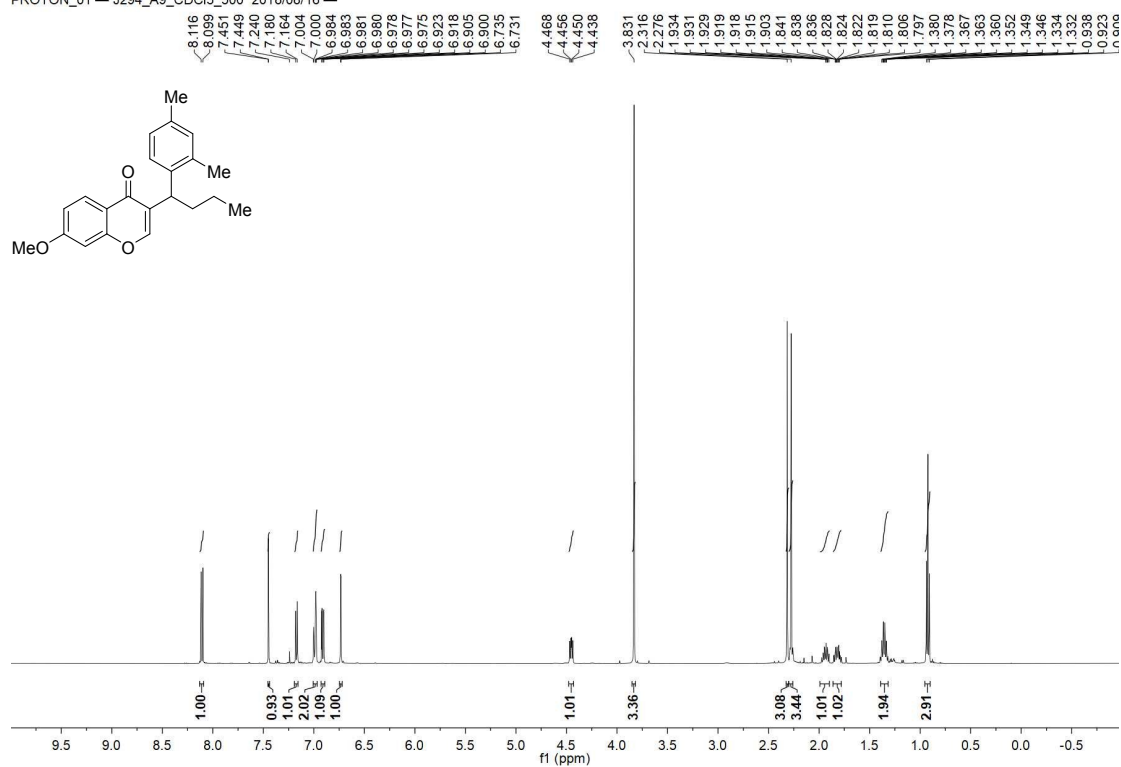

## <sup>13</sup>C NMR

CARBON\_01 — J294\_A9\_CDCl3\_500 2018/08/16 —

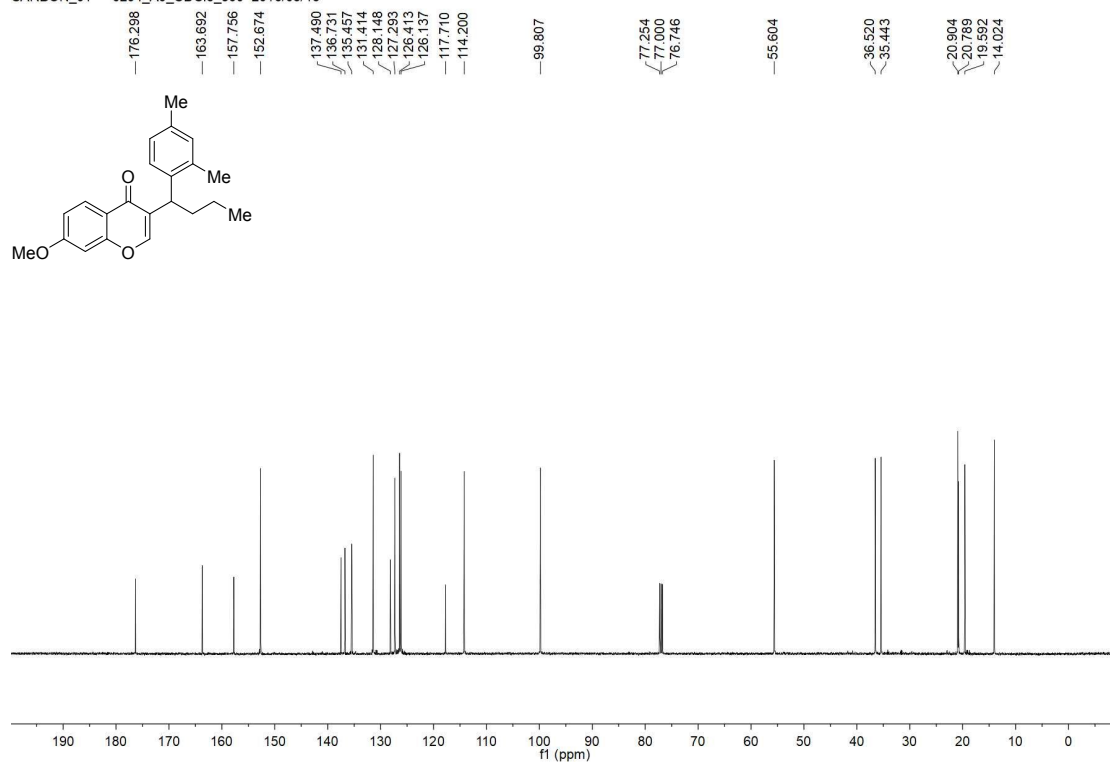

# 6-Chloro-3-(1-(2,5-dimethylphenyl)butyl)-4H-chromen-4-one (4c)

## <sup>1</sup>H NMR

PROTON\_01 — J209\_A1-3w\_CDCl3\_500 2018/06/22 —

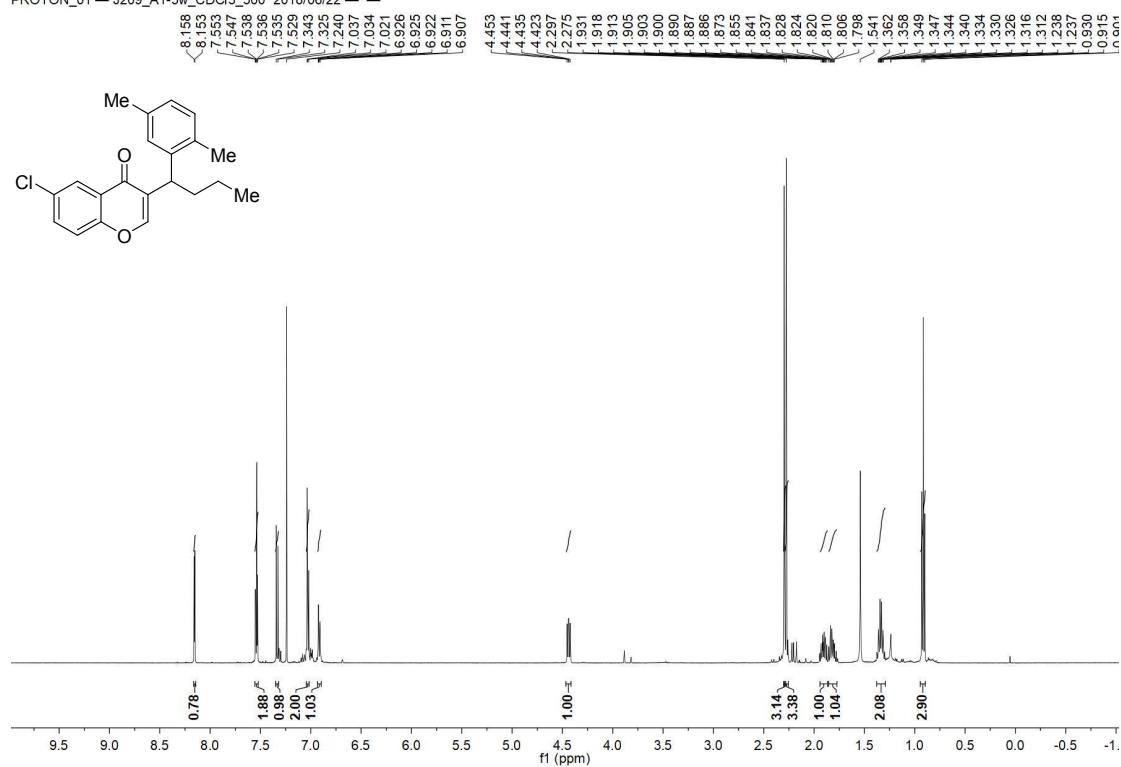

## <sup>13</sup>C NMR

CARBON\_01 — J209\_A1-3w\_CDCl3\_500 2018/06/22 —

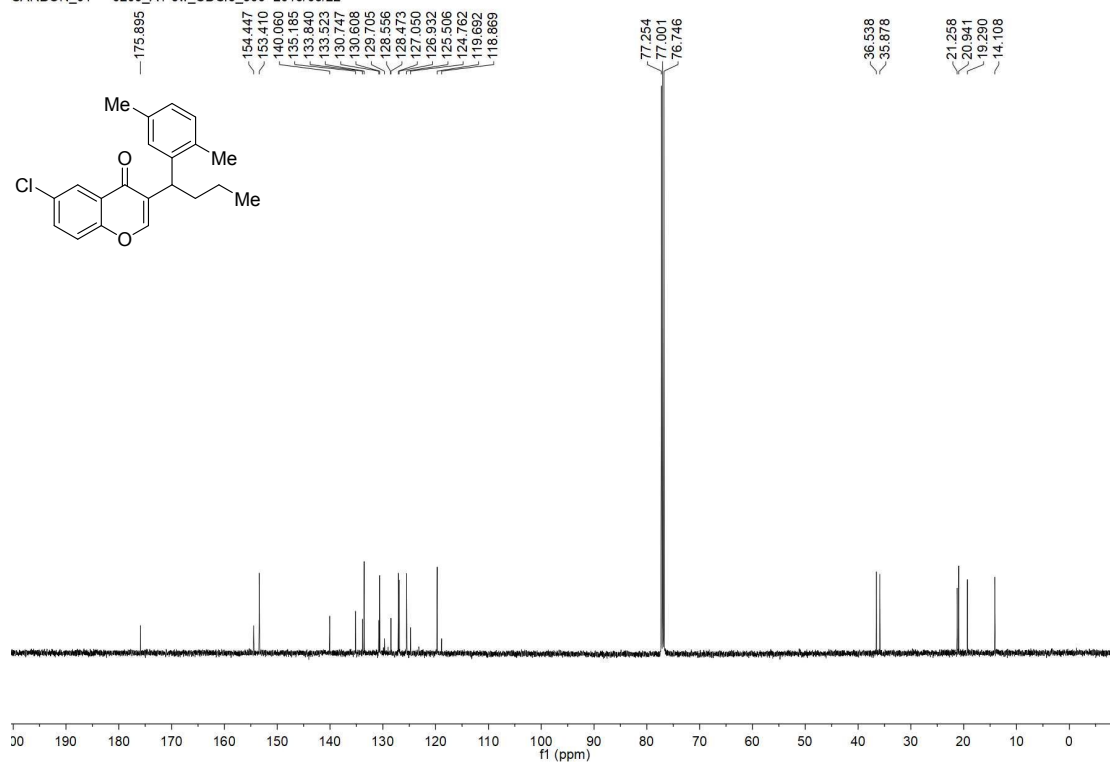

### 3-(1-(3,4-Dimethylphenyl)butyl)-4H-chromen-4-one (4d)

<sup>1</sup>H NMR

PROTON\_01 — J211\_A6-7\_A37-43\_CDCl3\_500 2019/01/19 —

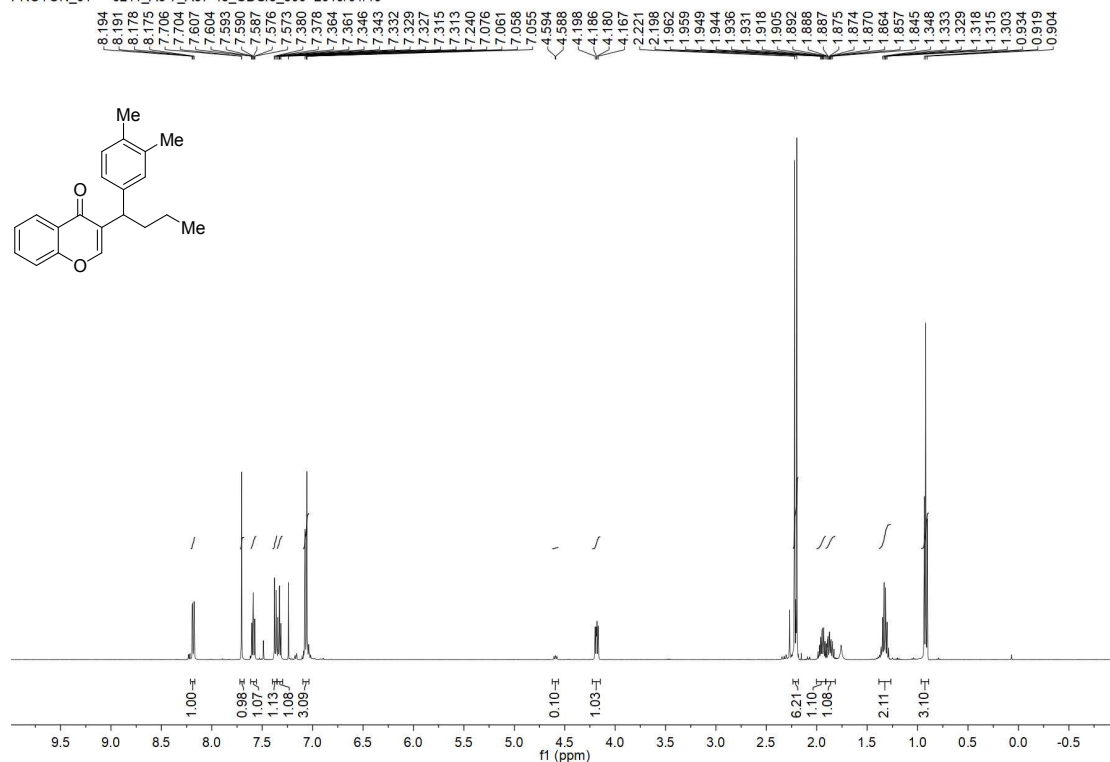

<sup>13</sup>C NMR

CARBON\_01 — J211\_A6-7\_A37-43\_CDCl3\_500 2019/01/19 —

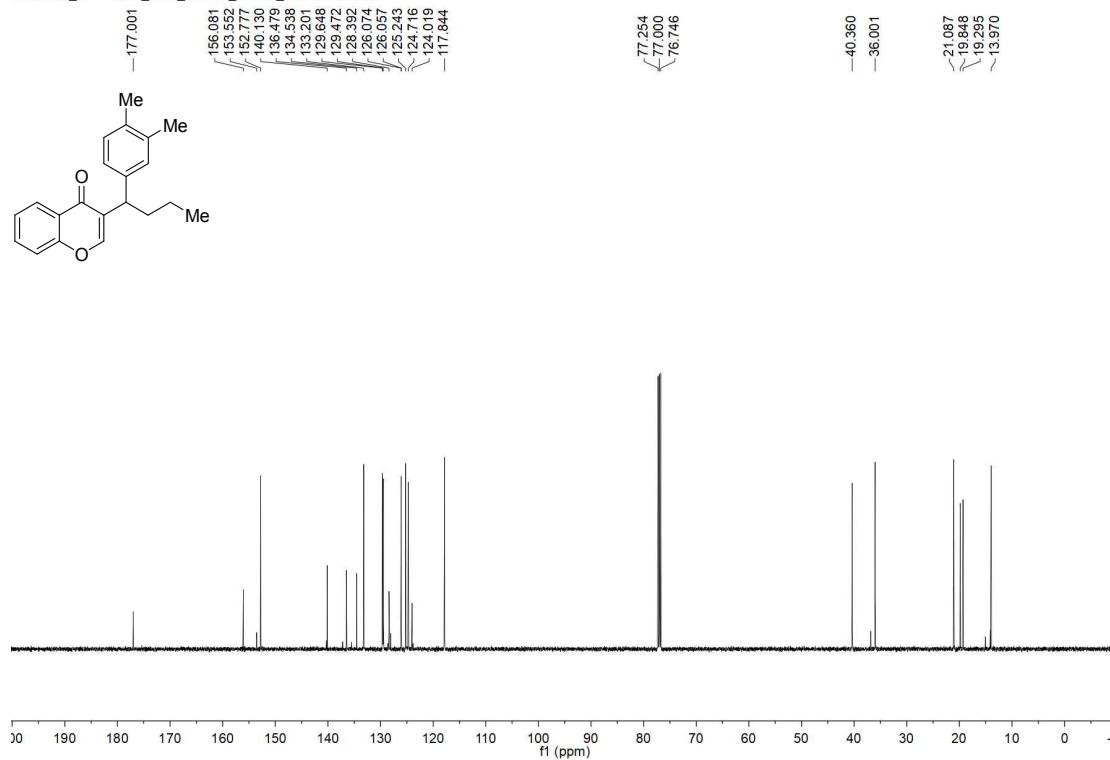

# 7-Methoxy-3-(3-phenyl-1-(p-tolyl)propyl)-4H-chromen-4-one (6a)

## <sup>1</sup>H NMR

PROTON\_01 — L483\_A21-25\_CDCl3\_500 2019/01/04 —

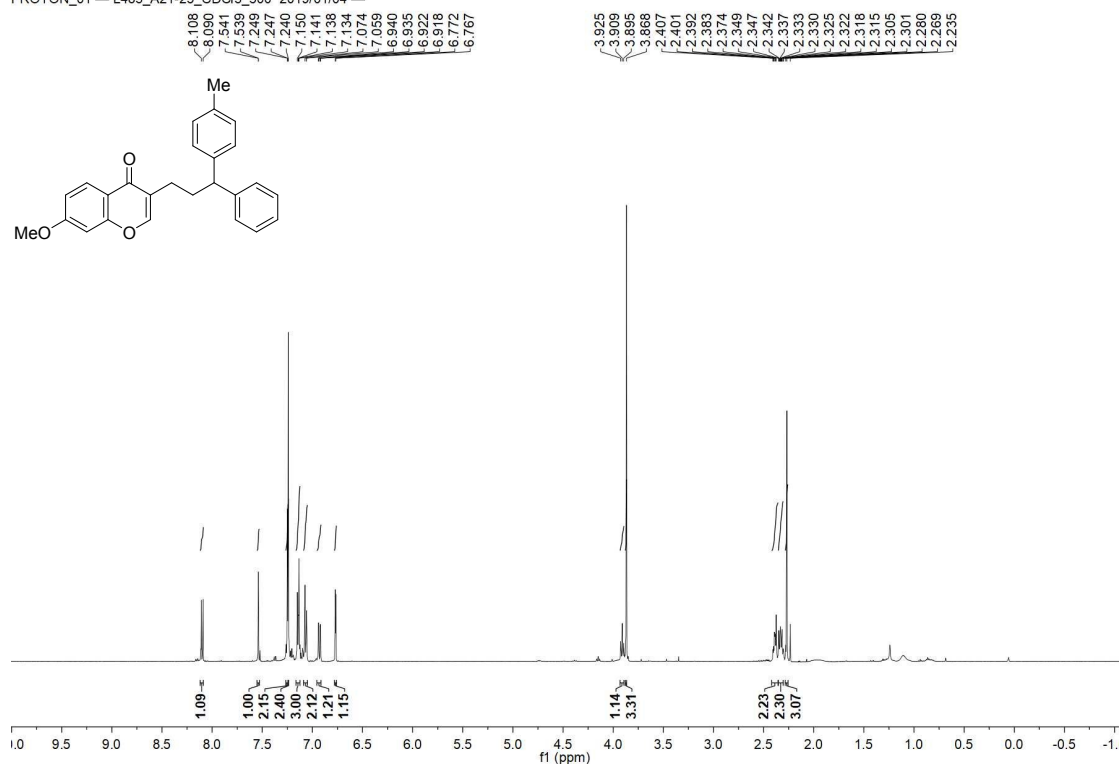

## <sup>13</sup>C NMR

CARBON\_01 — L483\_A21-25\_CDCl3\_500 2019/01/04 —

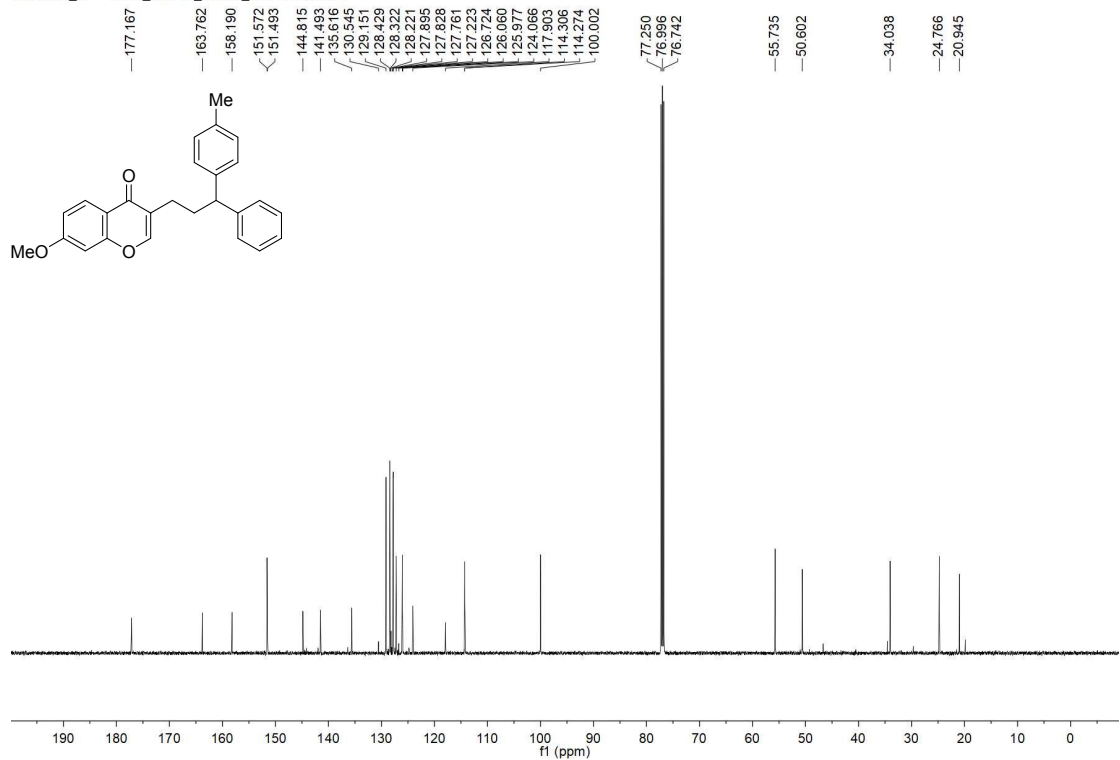



### 3-(1,3-Di-p-tolylpropyl)-4H-chromen-4-one (6b)

#### <sup>1</sup>H NMR

PROTON\_01 — J205\_A3-9\_CDCl3\_500 2018/06/01 —

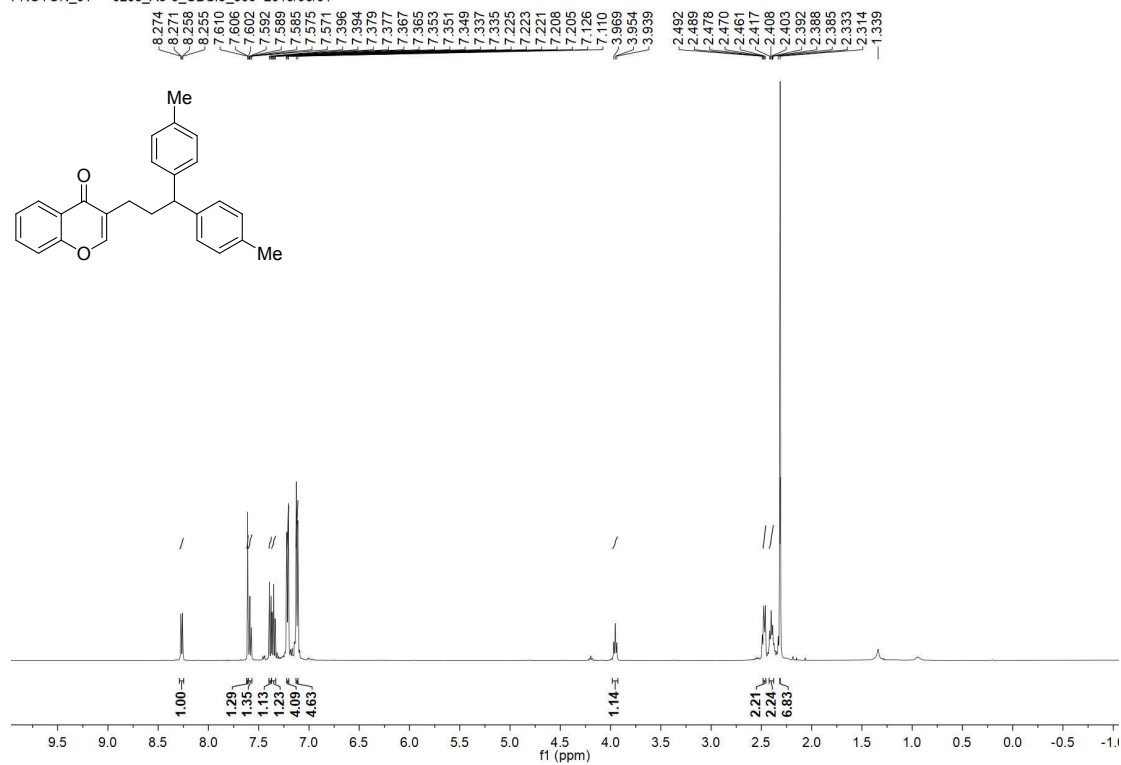

#### <sup>13</sup>C NMR

CARBON\_01 — J205\_A3-9\_CDCl3\_500 2018/06/01 —

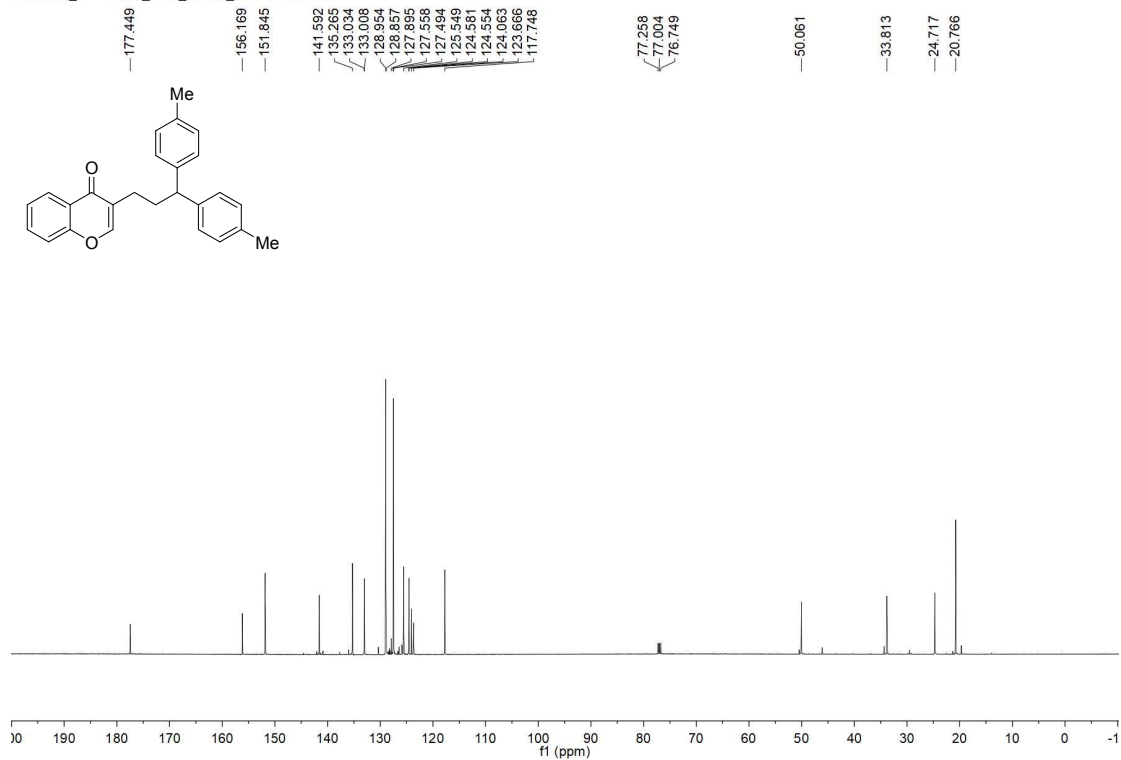

### 3-(1,3-Di-p-tolylpropyl)-7-methoxy-4H-chromen-4-one (6c)

#### <sup>1</sup>H NMR

PROTON\_01 — J206\_A6-11\_A29-38\_CDCl3\_500 2019/01/19 —

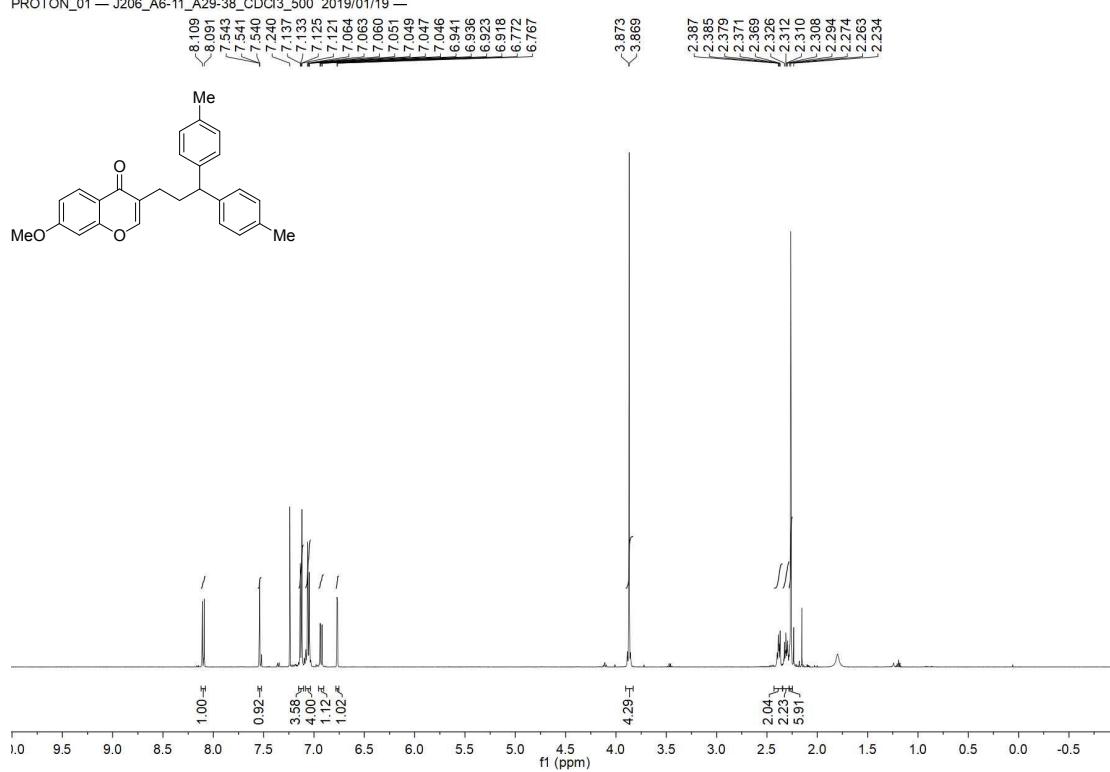

#### <sup>13</sup>C NMR

CARBON\_01 — J206\_A6-11\_A29-38\_CDCl3\_500 2019/01/19 —

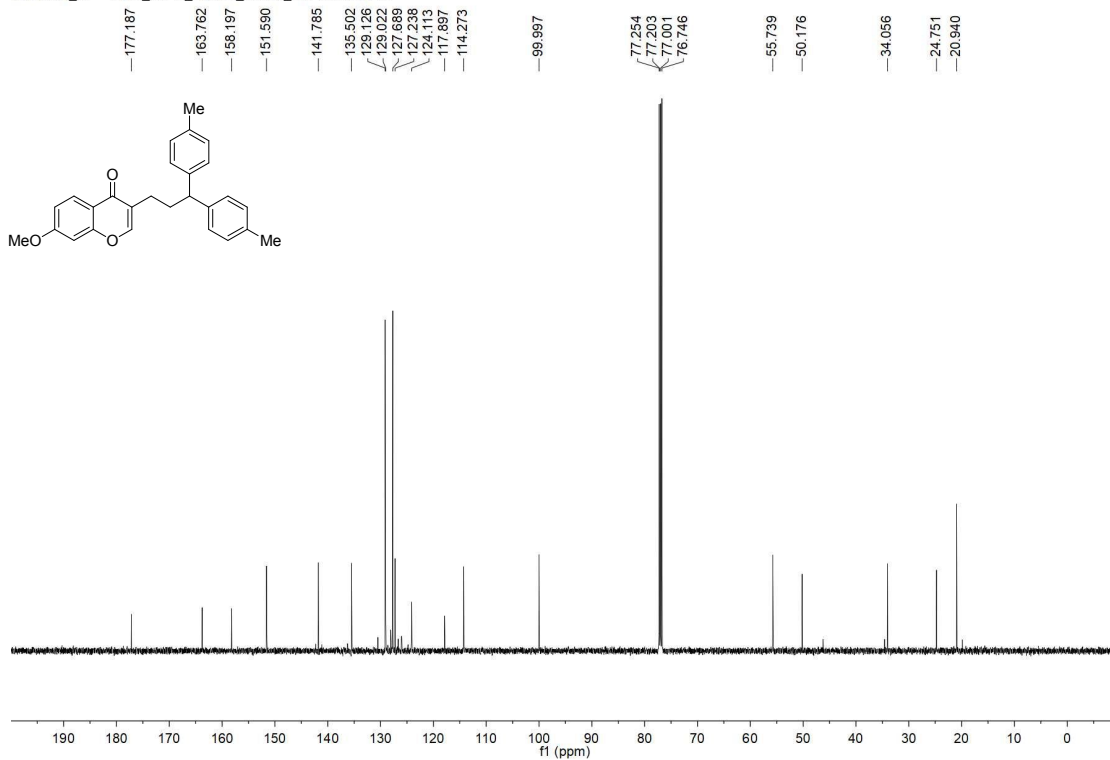

### 3-(1-(3,4-Dimethylphenyl)-3-(p-tolyl)propyl)-4H-chromen-4-one (6d)

<sup>1</sup>H NMR

PROTON\_01 — J215\_A3-10\_A22-28\_CDCl3\_500\_2019/01/19 —

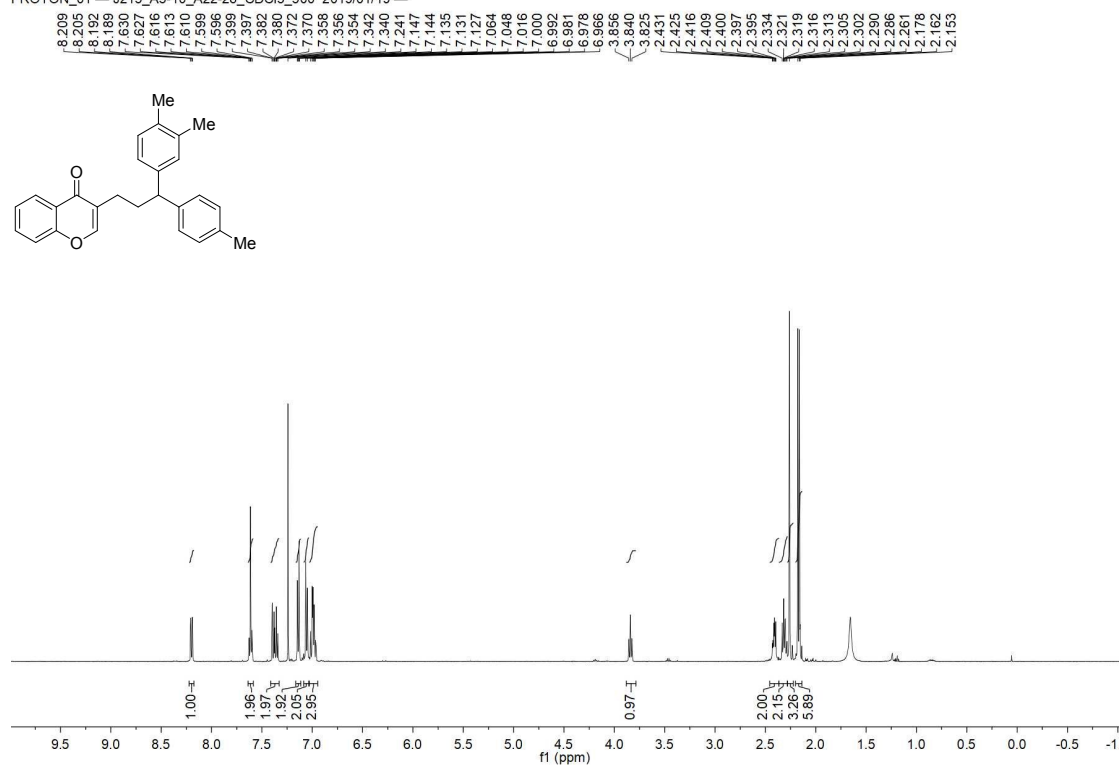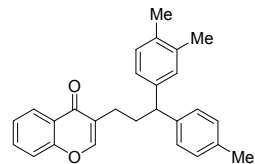

<sup>13</sup>C NMR

CARBON\_01 — J215\_A3-10\_A22-28\_CDCl3\_500\_2019/01/19 —

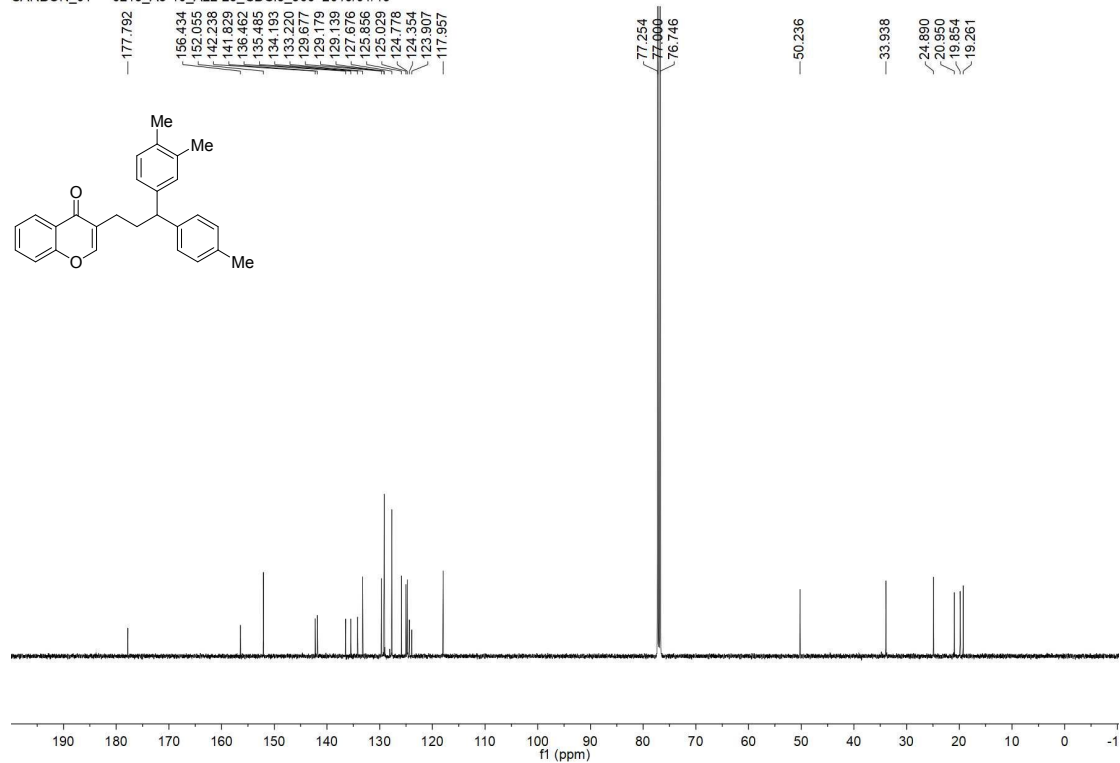

**3-(1-(2,5-Dimethylphenyl)-3-phenylpropyl)-7-methoxy-4H-chromen-4-one (6e)**  
<sup>1</sup>H NMR

PROTON\_01 — J213\_A4-9\_A35-39\_CDCl3\_500 2019/01/10 —

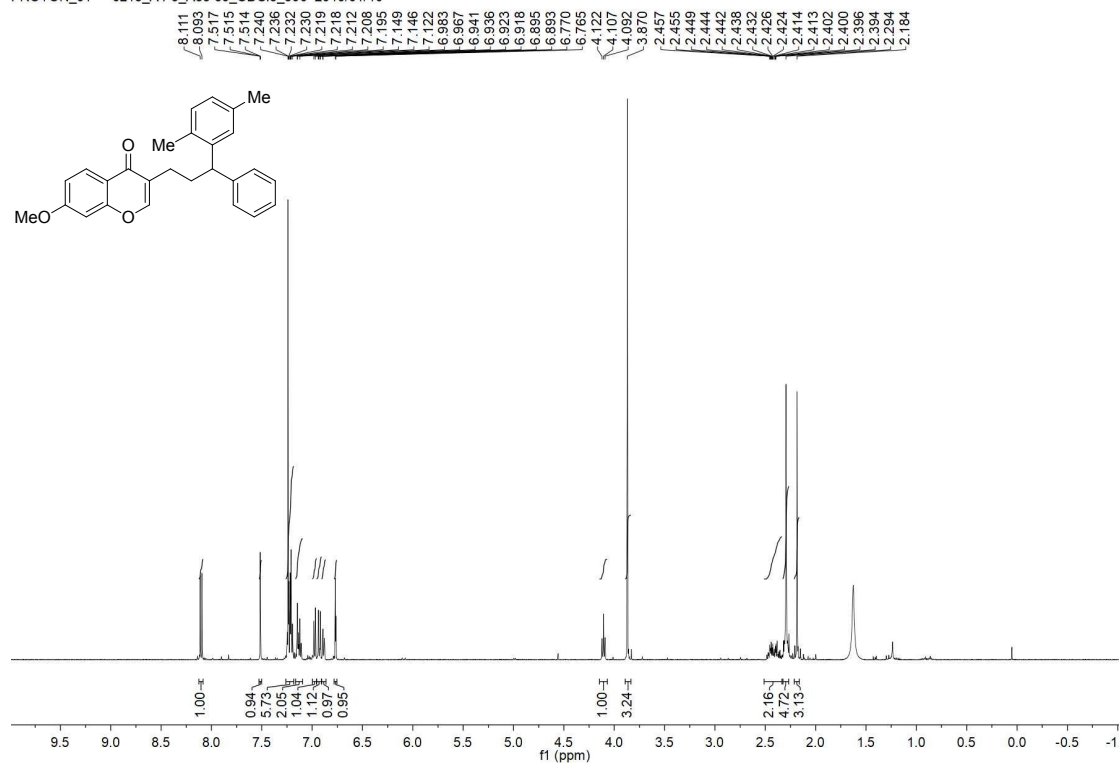

<sup>13</sup>C NMR

CARBON\_01 — J213\_A4-9\_A35-39\_CDCl3\_500 2019/01/10 —

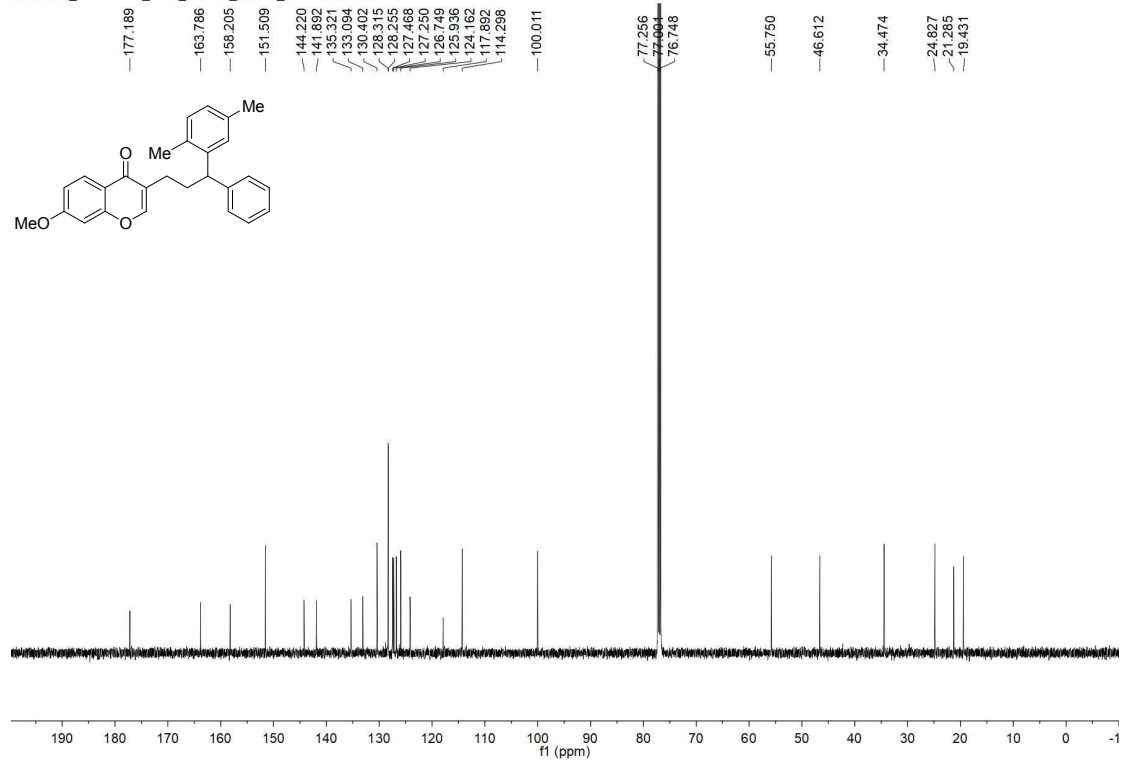

7-(1-(4-Methoxyphenyl)-3-phenylpropyl)-8H-[1,3]dioxolo[4,5-g]chromen-8-one (6f)  
<sup>1</sup>H NMR

PROTON\_01 — J214\_A14-18\_A17-21\_CDCl3\_500 2019/01/10 —

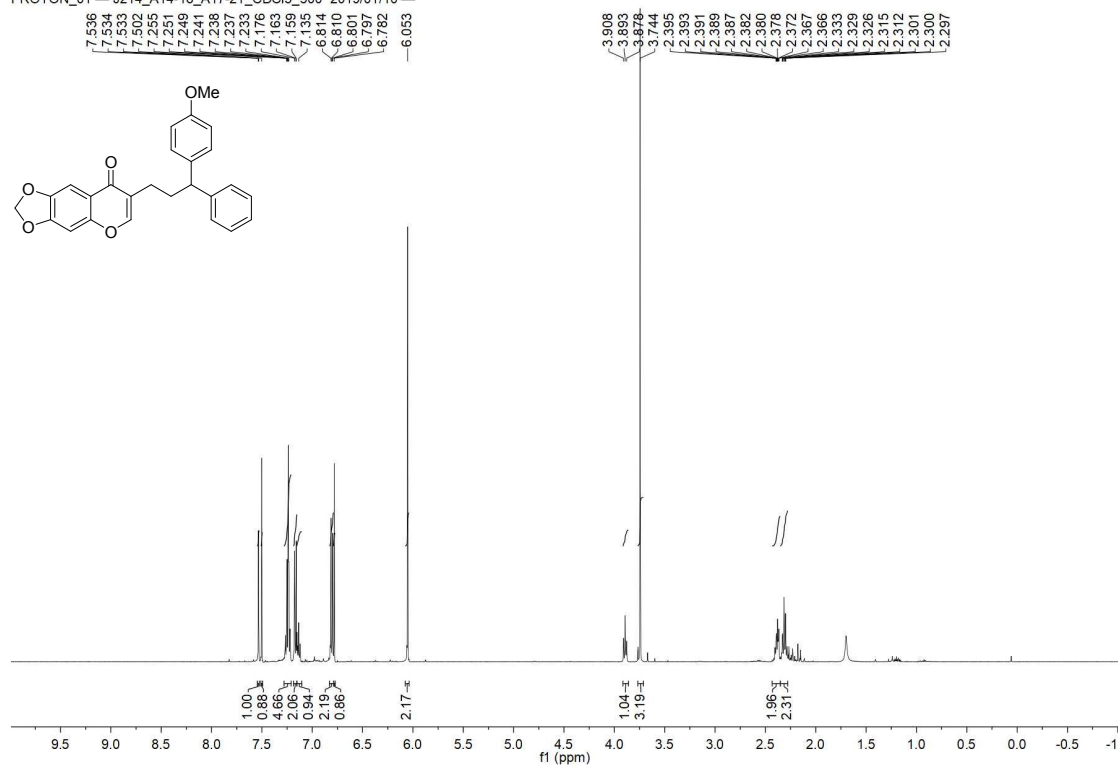

<sup>13</sup>C NMR

CARBON\_01 — J214\_A14-18\_A17-21\_CDCl3\_500 2019/01/10 —

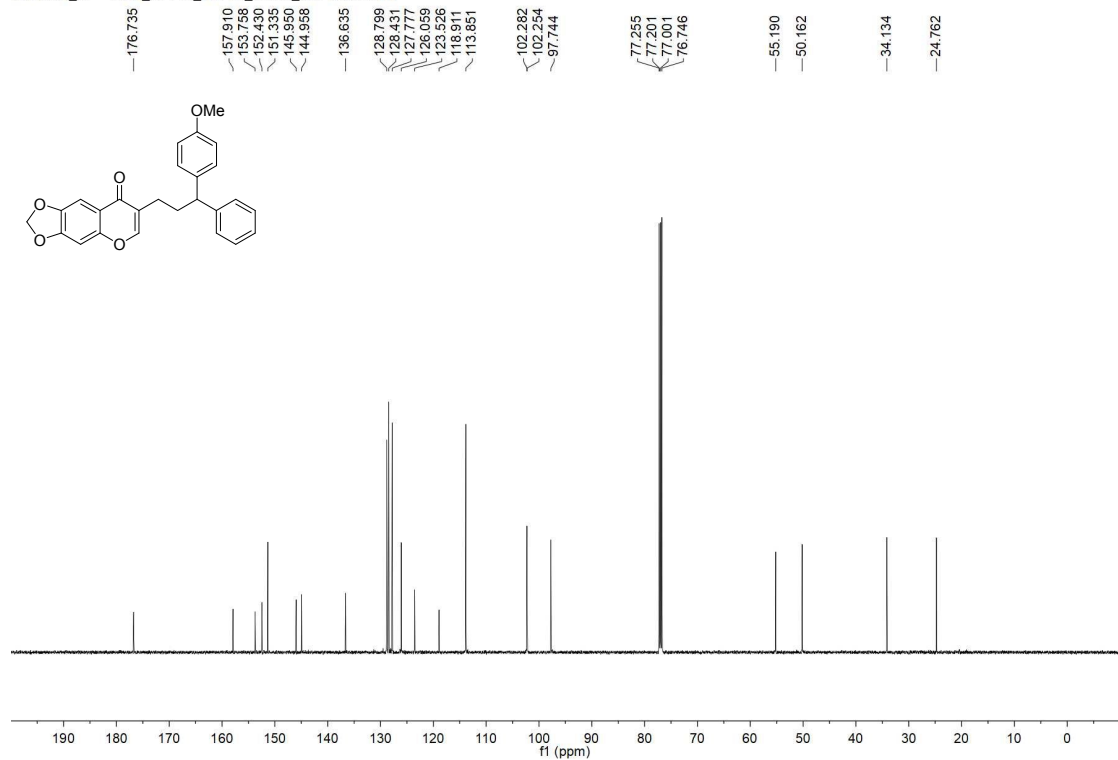

7-(1-(2-Methoxyphenyl)-3-phenylpropyl)-8H-[1,3]dioxolo[4,5-g]chromen-8-one (6f)

<sup>1</sup>H NMR

PROTON\_01 — J214\_A8-10\_A11-15\_CDCl3\_500 2019/01/10 —

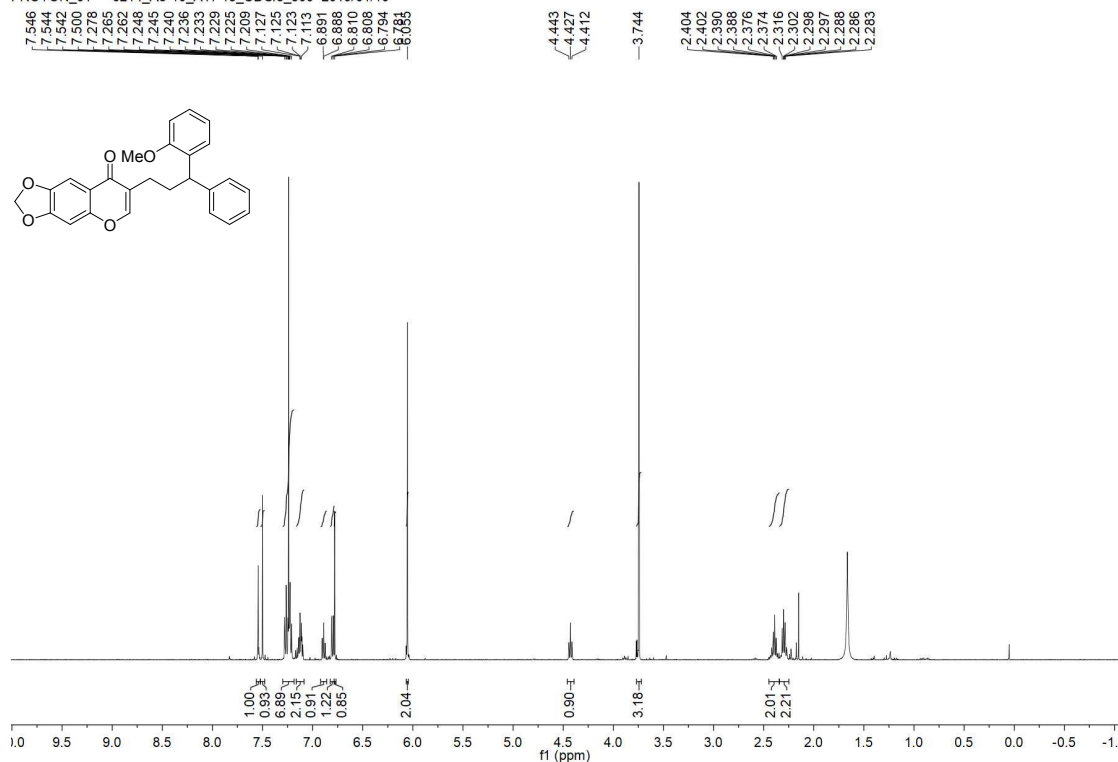

<sup>13</sup>C NMR

CARBON\_01 — J214\_A8-10\_A11-15\_CDCl3\_500 2019/01/10 —

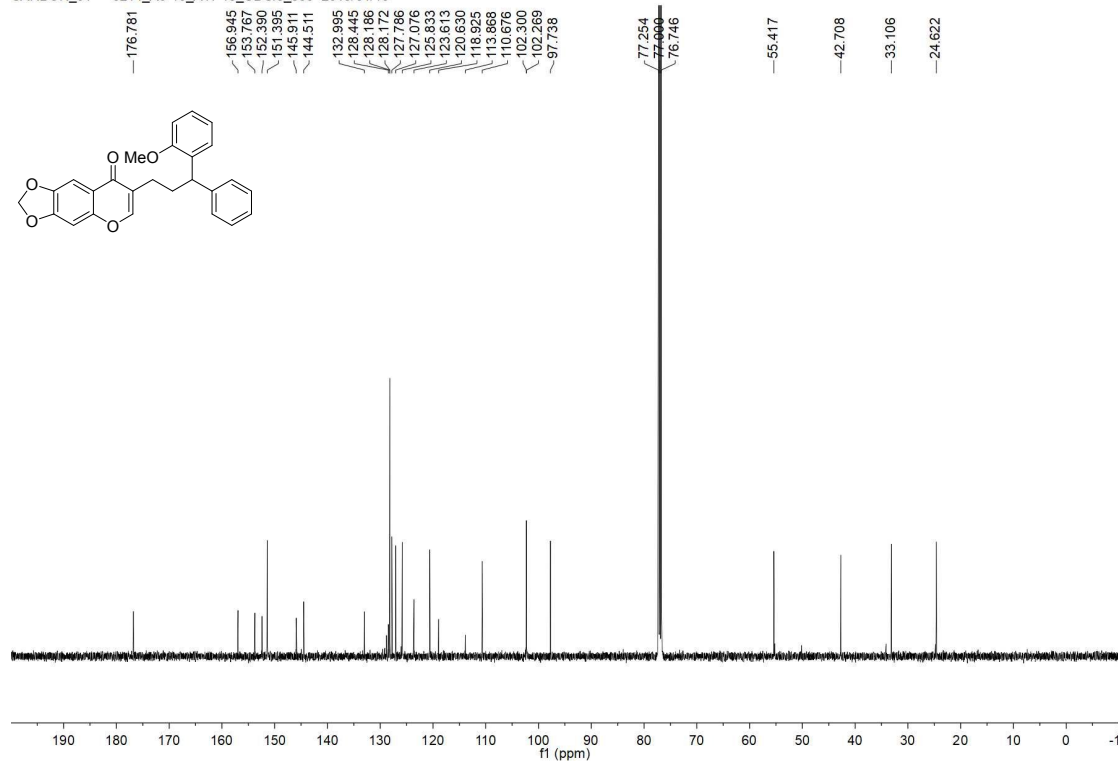

# 6-Chloro-3-(1,3-di-p-tolylpropyl)-4H-chromen-4-one (6g)

## <sup>1</sup>H NMR

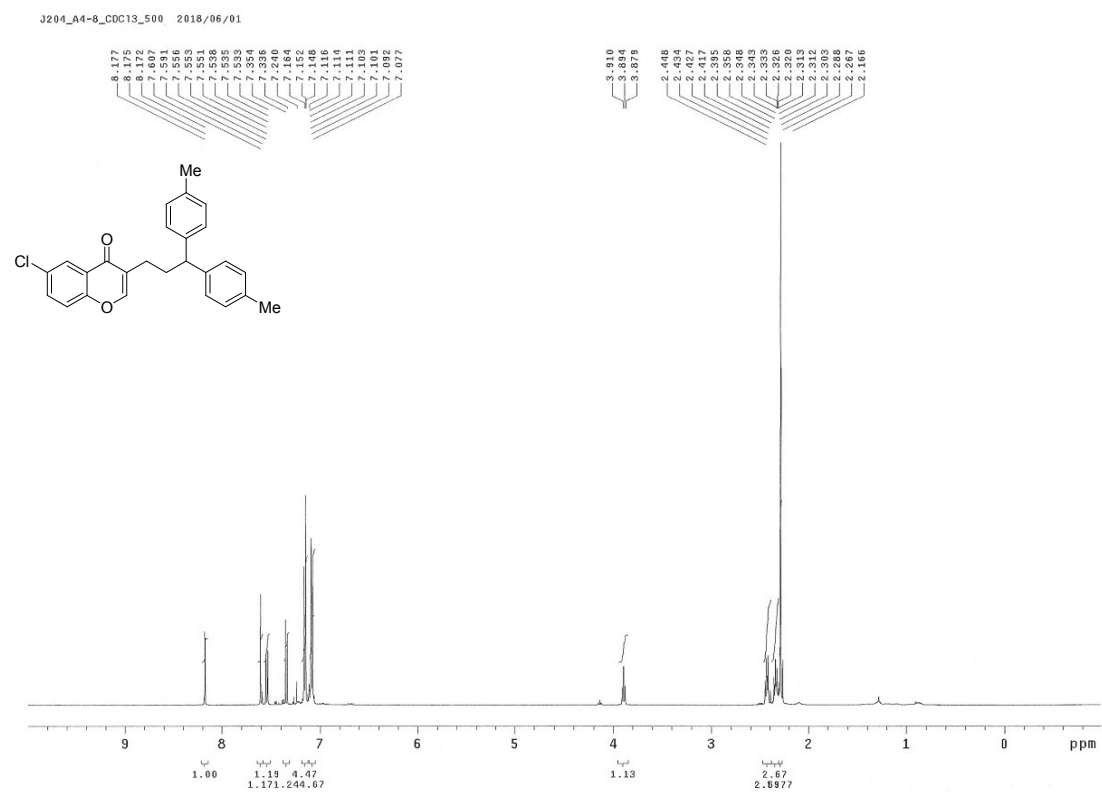

## <sup>13</sup>C NMR

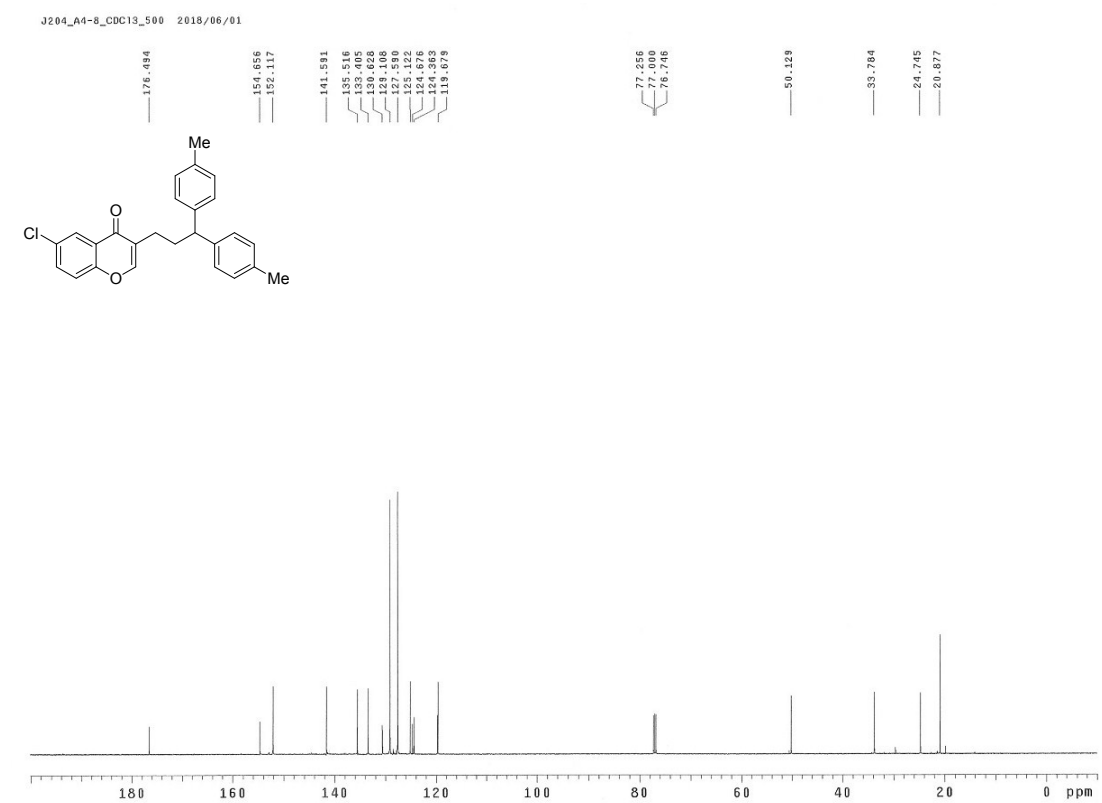

# 3-(1-([1,1'-Biphenyl]-4-yl)-3-(p-tolyl)propyl)-7-methoxy-4H-chromen-4-one (6h)

## <sup>1</sup>H NMR

J216\_A7-14\_CDCl3\_500 2018/06/13

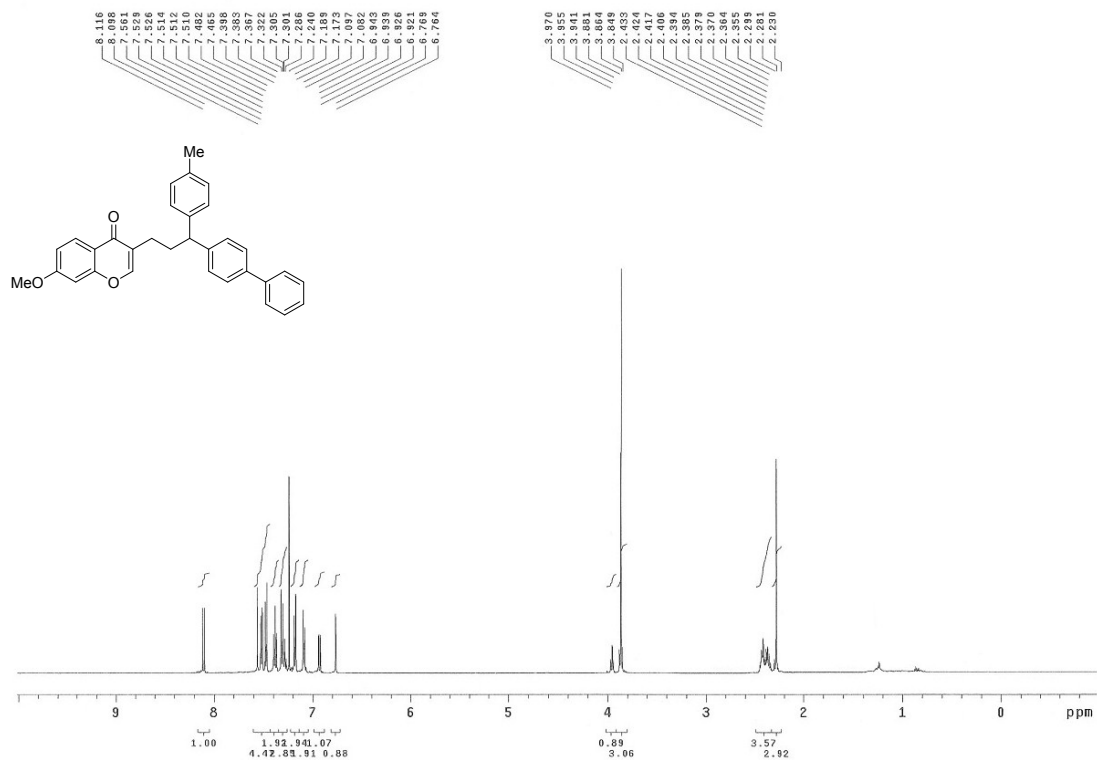

## <sup>13</sup>C NMR

J216\_A7-14\_CDCl3\_500 2018/06/13

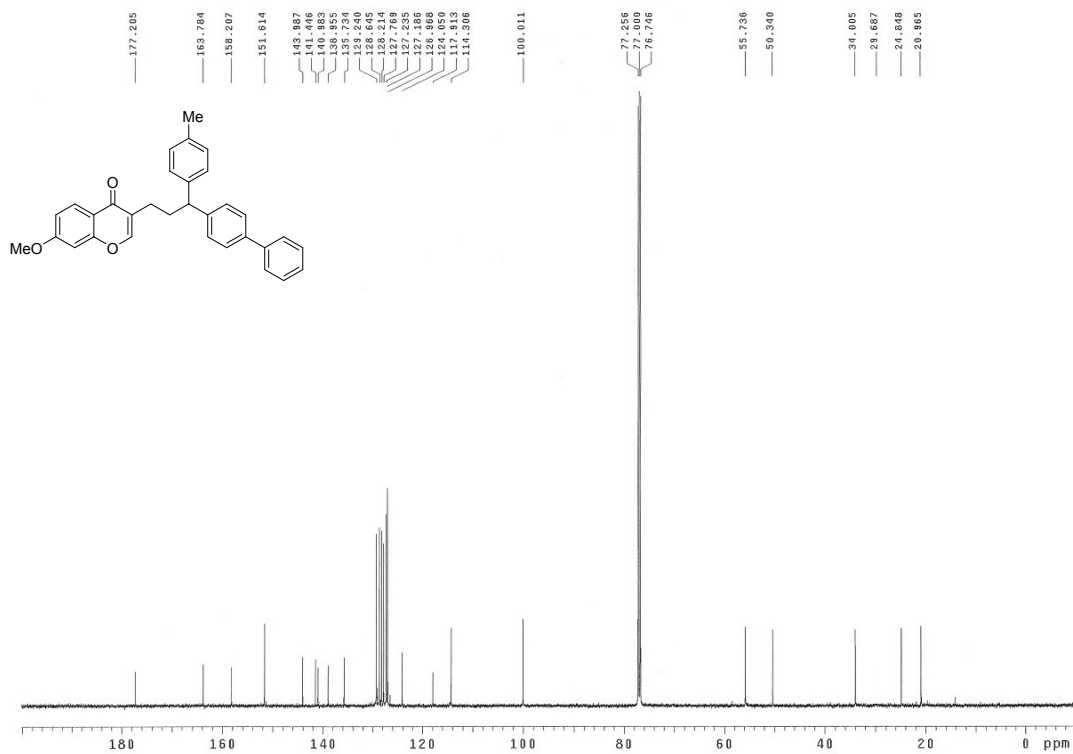



7-Methoxy-3-(3-(2,4-dimethylphenyl)-3-phenylpropyl)-4H-chromen-4-one (**6i**)

<sup>1</sup>H NMR

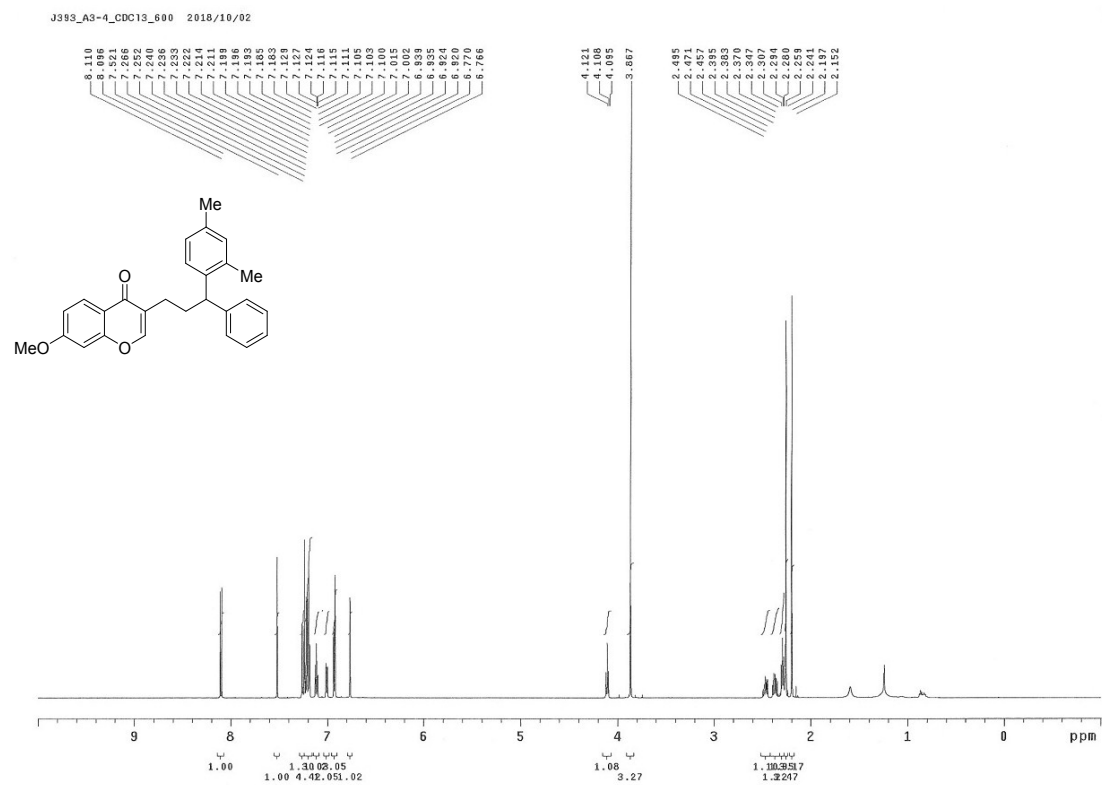

<sup>13</sup>C NMR

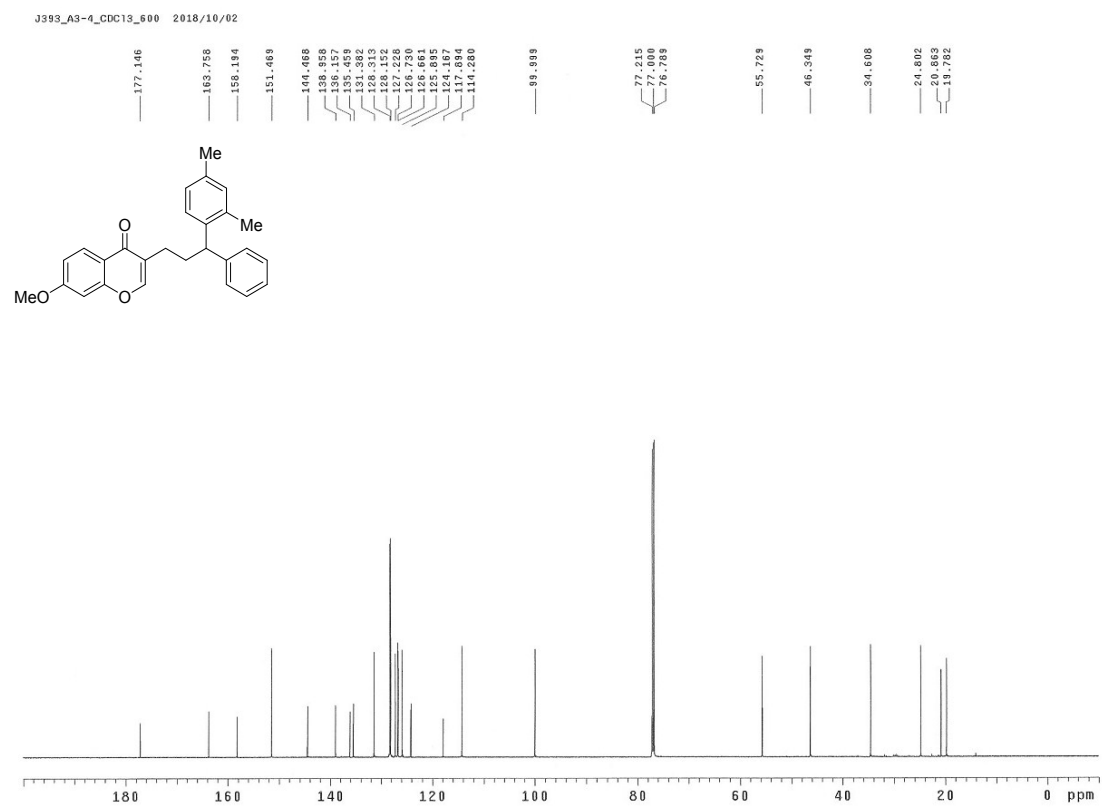

*Butyl (E)-3-(3,5-dimethyl-2-(1-(4-oxo-4H-chromen-3-yl)propyl)phenyl)acrylate (7a)*  
<sup>1</sup>H NMR

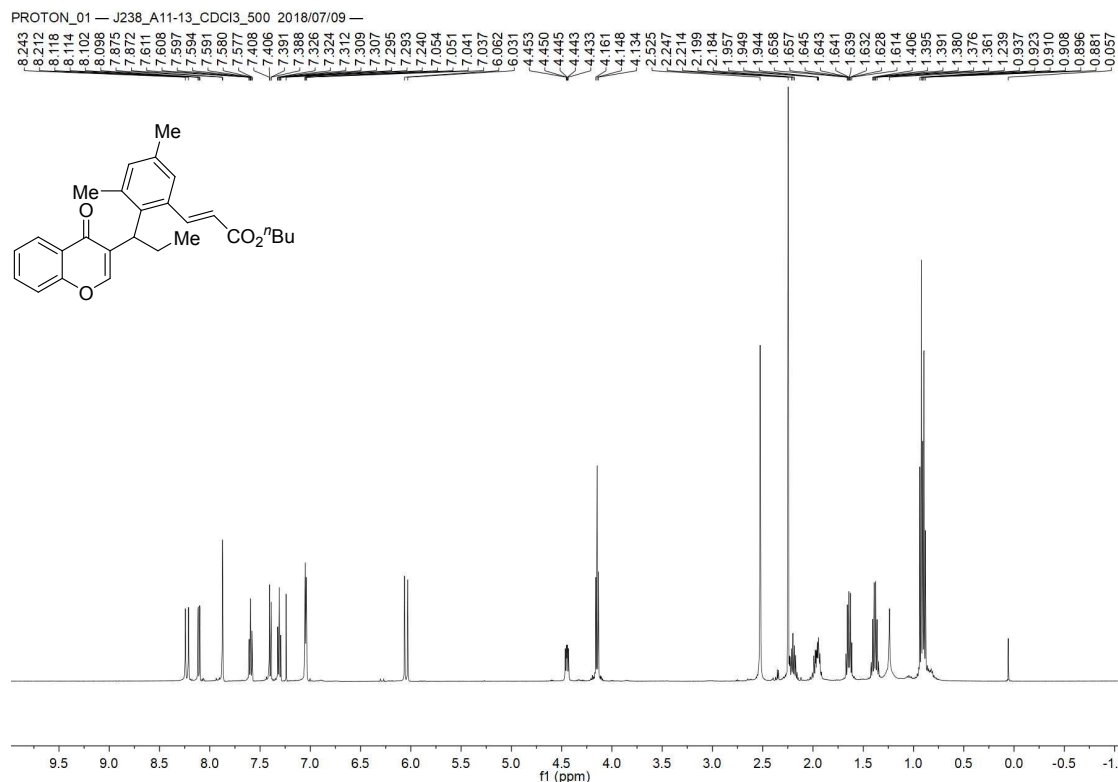

<sup>13</sup>C NMR

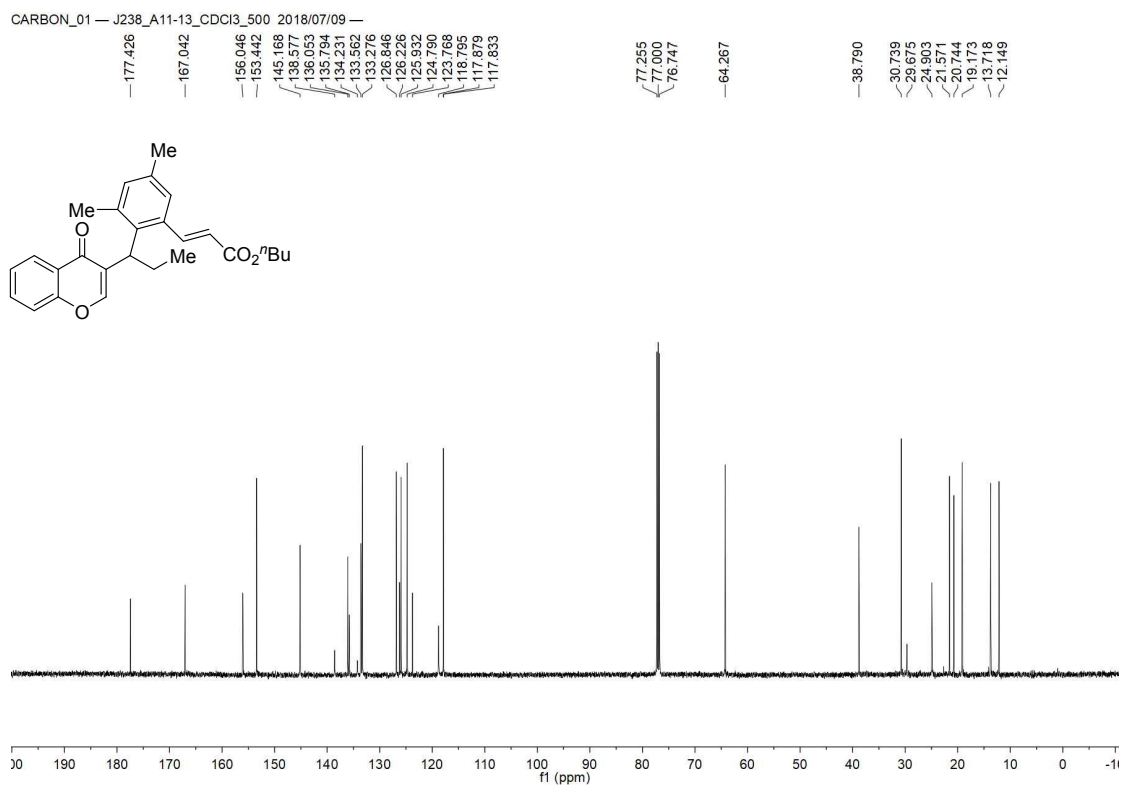

*Methyl (E)-3-(3,5-dimethyl-2-(1-(4-oxo-4H-chromen-3-yl)propyl)phenyl)acrylate (7b)*  
<sup>1</sup>H NMR

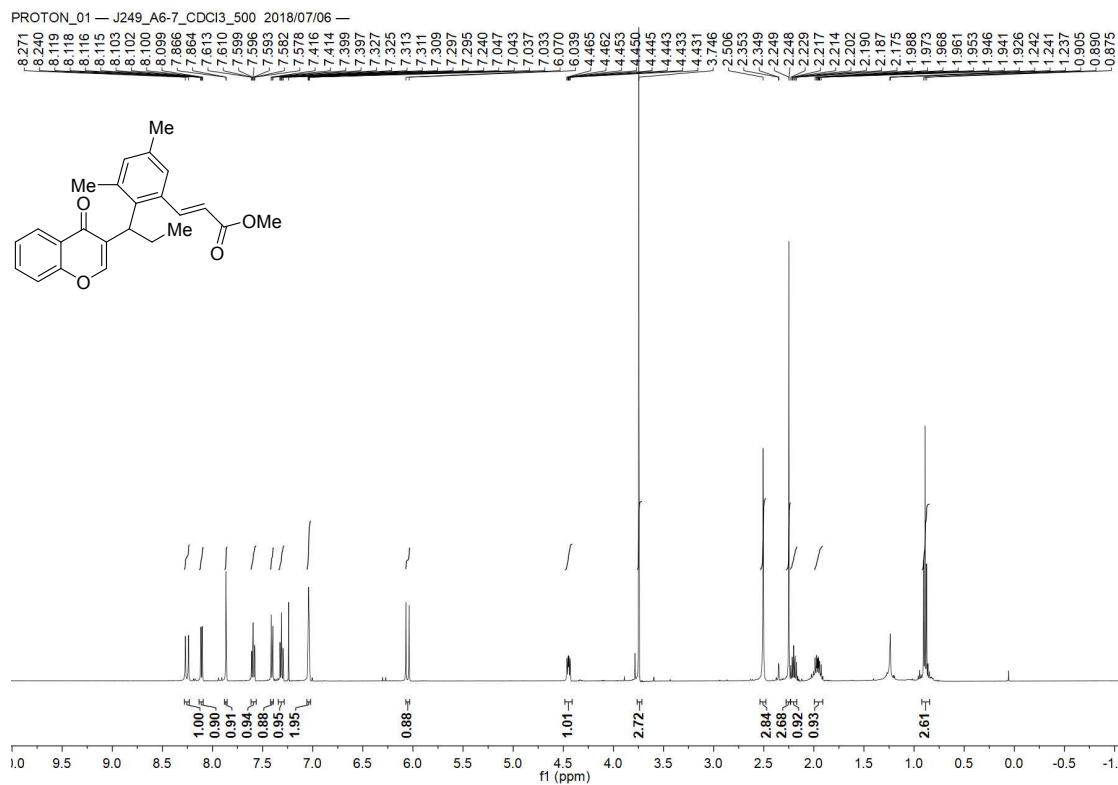

<sup>13</sup>C NMR

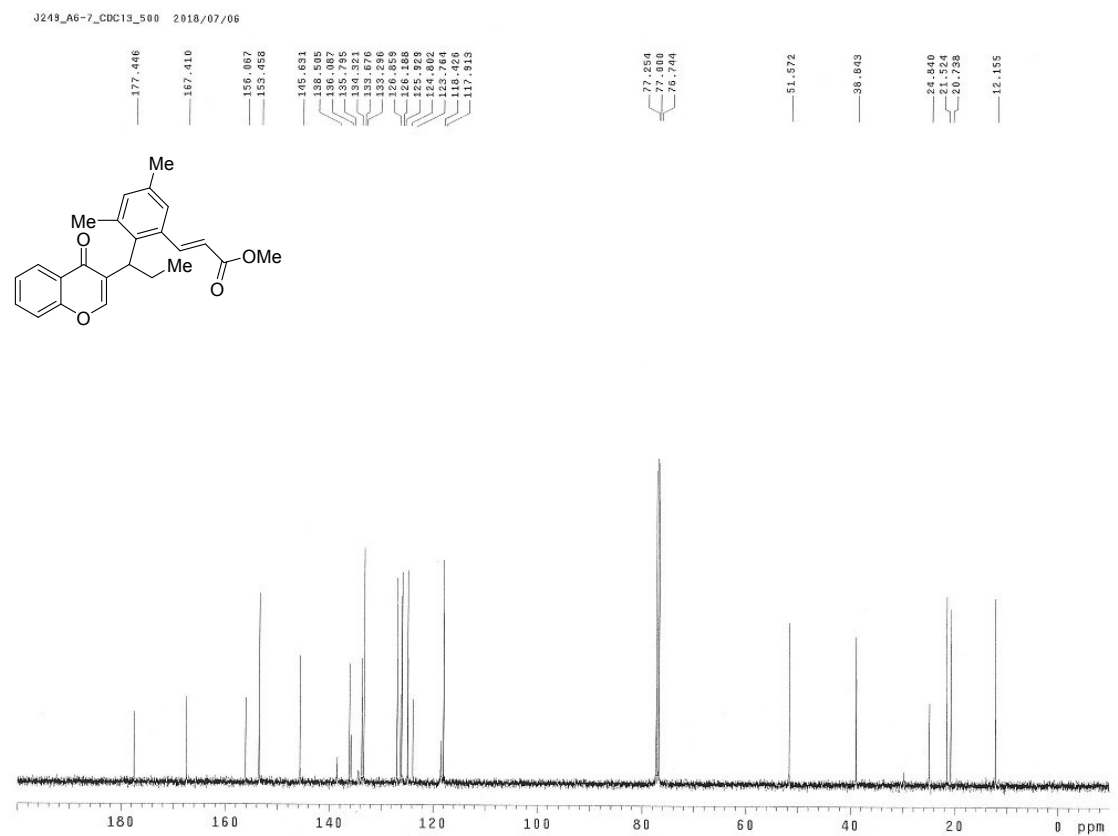

*Butyl* (E)-3-(2-(1-(6-fluoro-4-oxo-4H-chromen-3-yl)propyl)-3,5-dimethylphenyl)acrylate (**7c**)

<sup>1</sup>H NMR

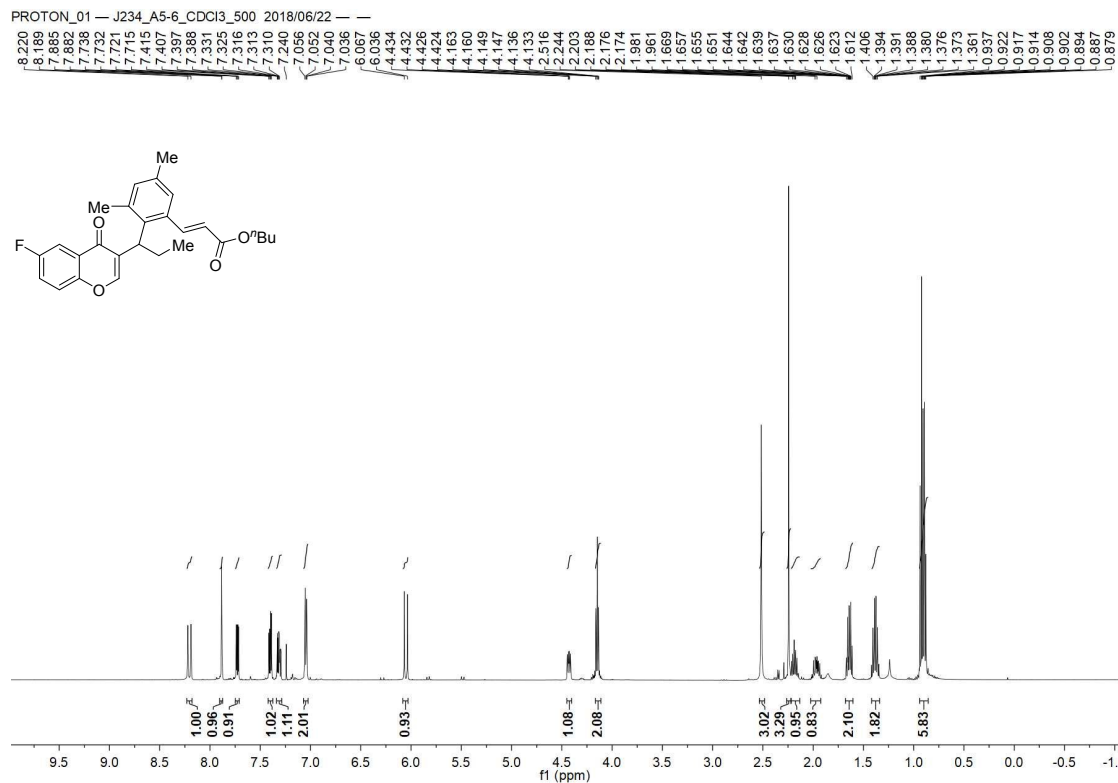

<sup>13</sup>C NMR

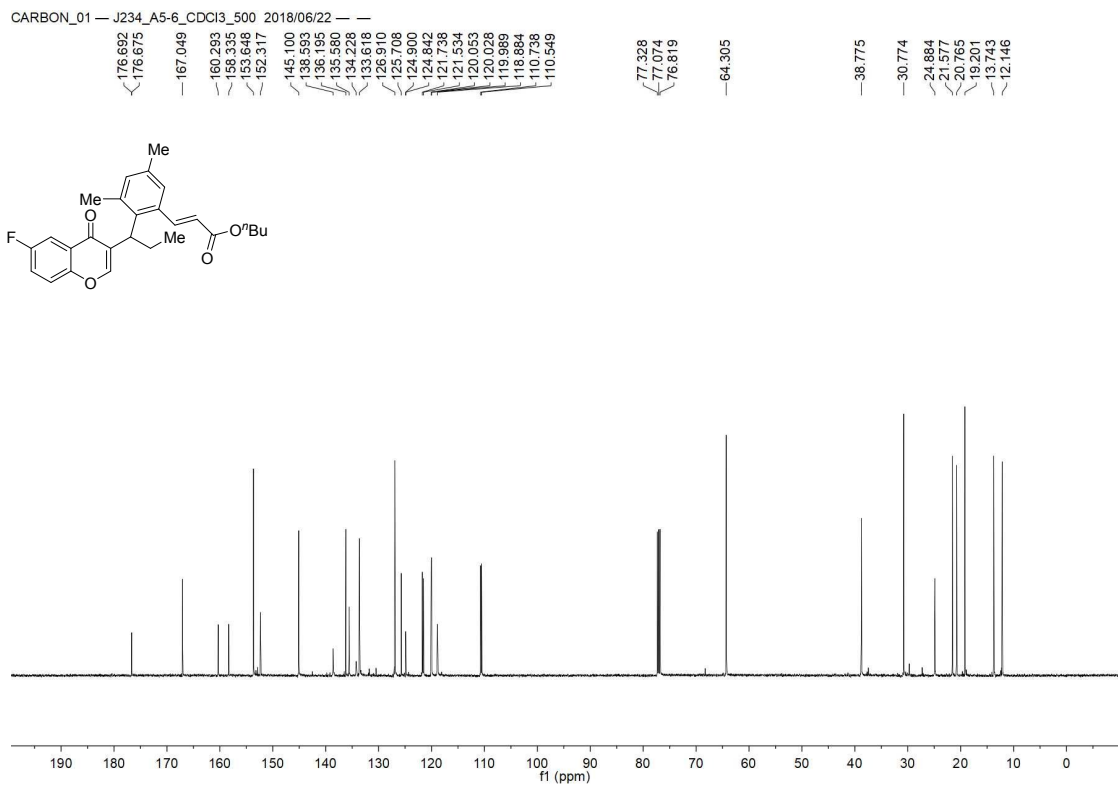



# Ethyl (E)-3-(5-methyl-2-(1-(4-oxo-4H-chromen-3-yl)propyl)phenyl)acrylate (7e)

## <sup>1</sup>H NMR

PROTON\_01 — J256\_A7-18\_A14-17\_CDCl3\_500 2019/01/10 —

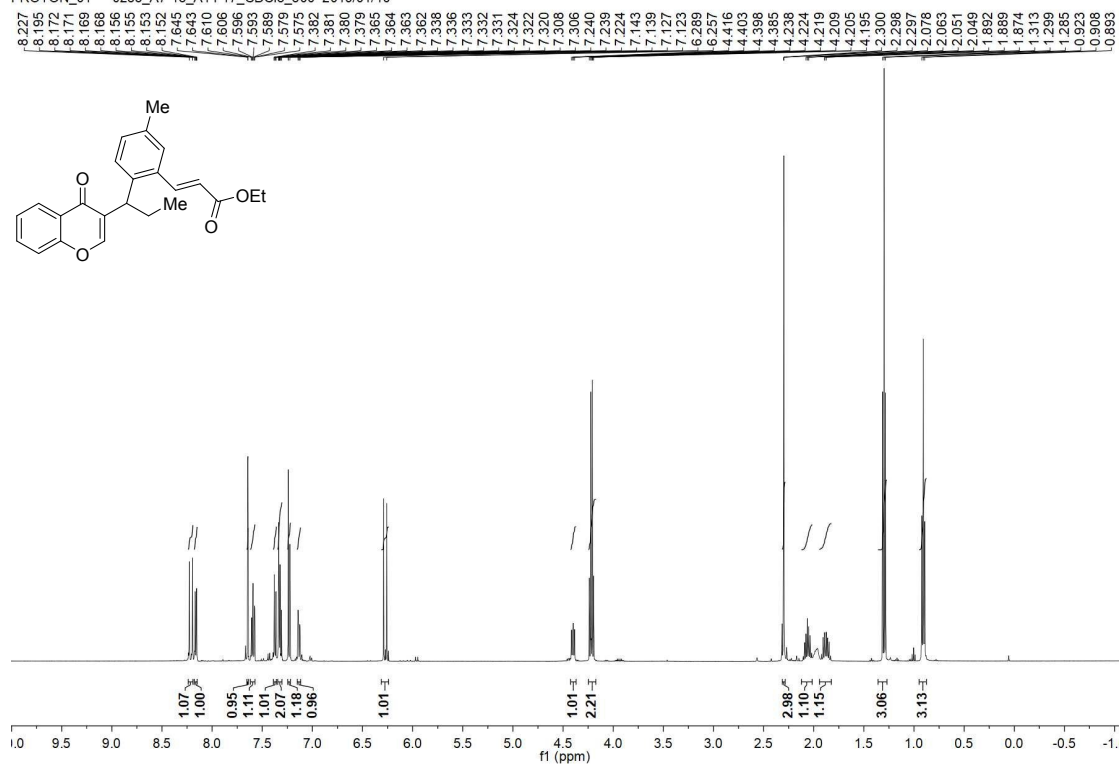

## <sup>13</sup>C NMR

CARBON\_01 — J256\_A7-18\_A14-17\_CDCl3\_500 2019/01/10 —

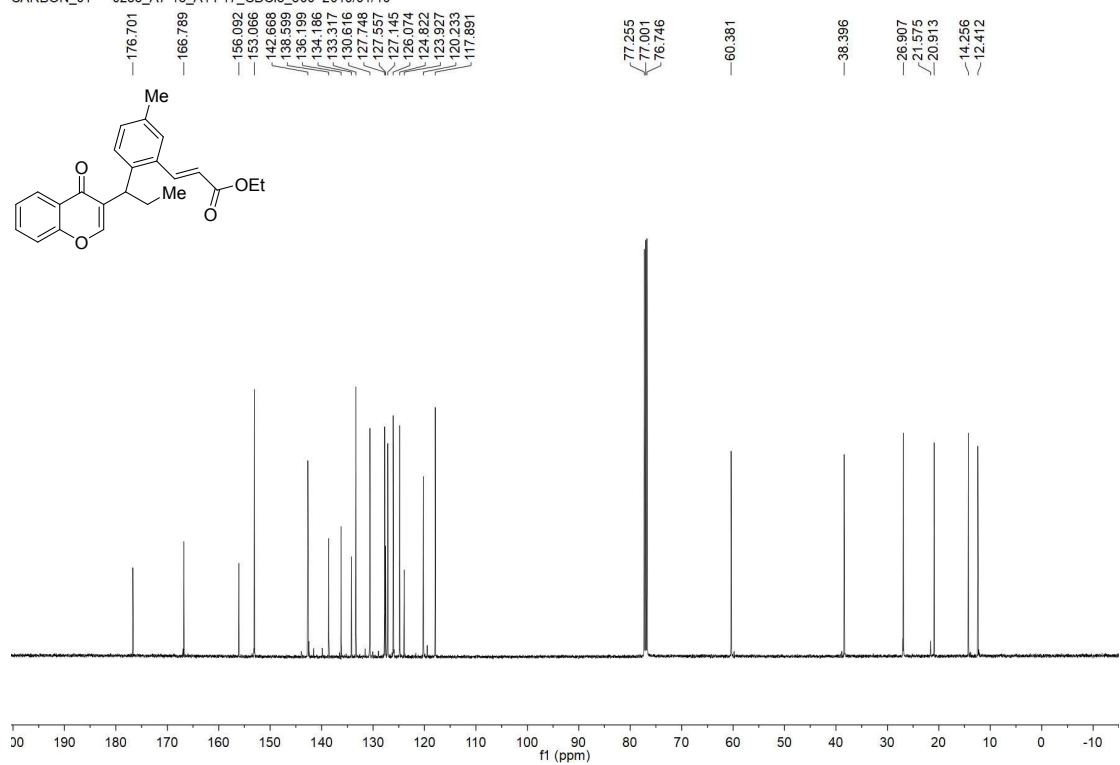

# Ethyl (E)-3-(3-methyl-2-(1-(4-oxo-4H-chromen-3-yl)propyl)phenyl)acrylate (7e')

## <sup>1</sup>H NMR

PROTON\_01 — J256A1-3\_A15-19\_CDCl3\_500 2019/01/04 —

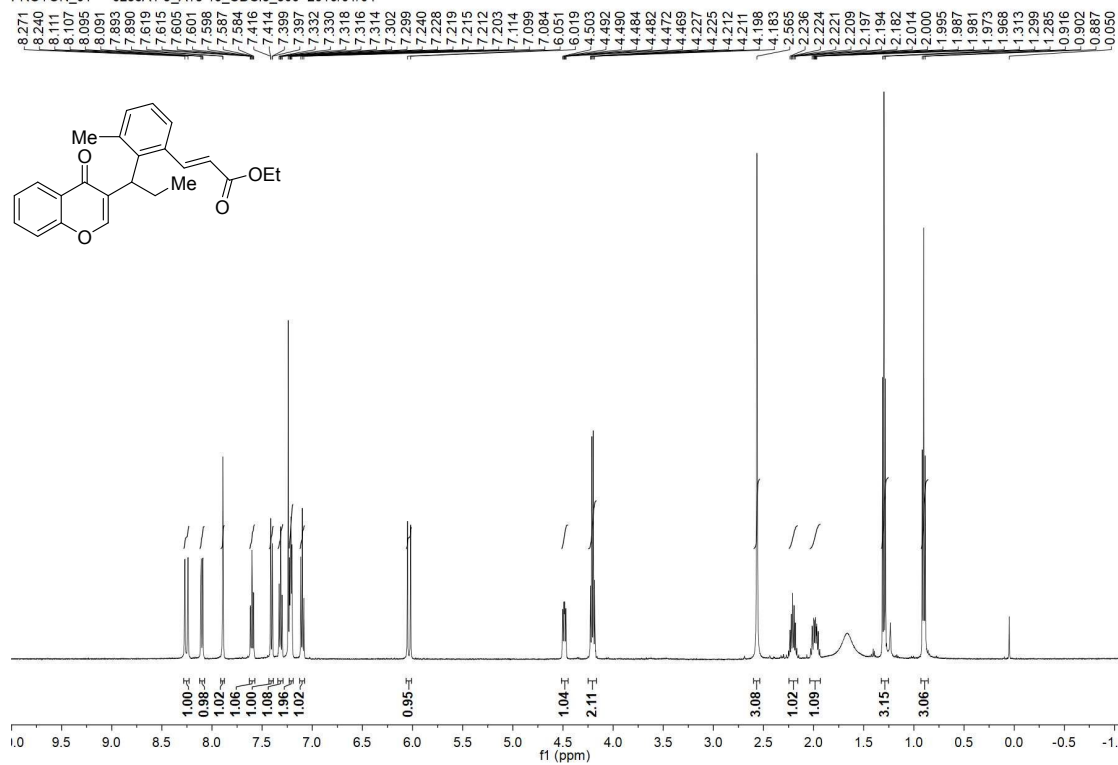

## <sup>13</sup>C NMR

CARBON\_01 — J256A1-3\_A15-19\_CDCl3\_500 2019/01/04 —

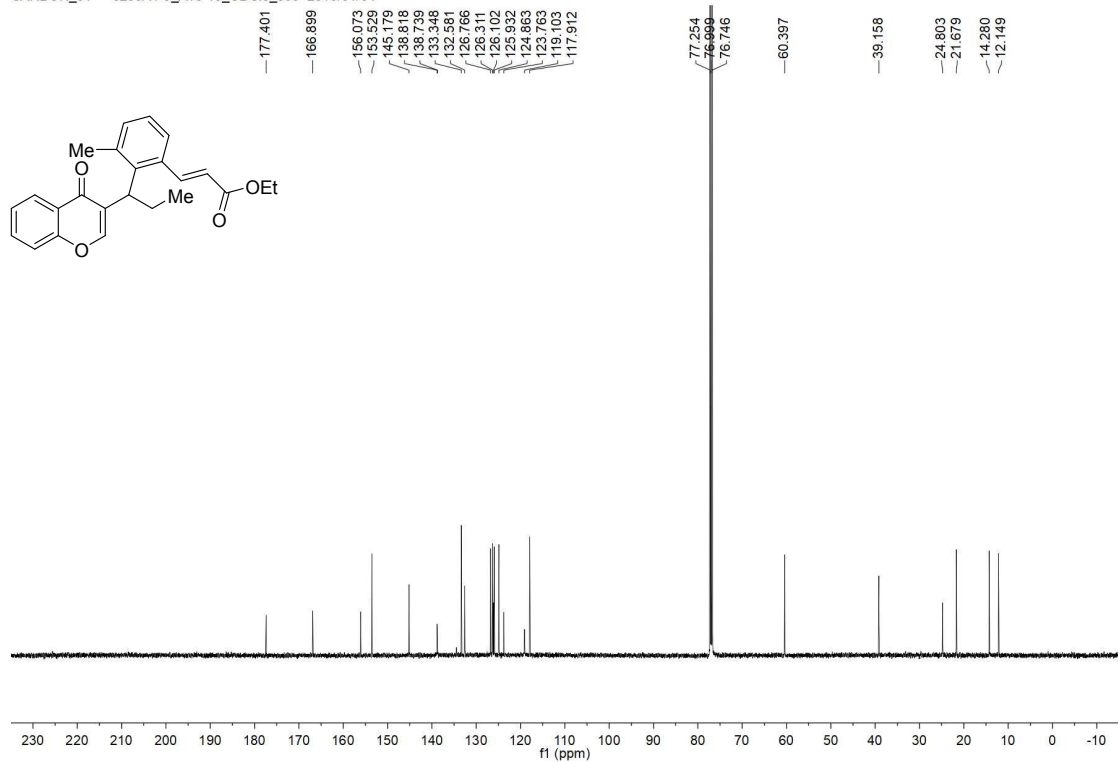

*Diethyl 3,3'-(5-methyl-2-(1-(4-oxo-4H-chromen-3-yl)propyl)-1,3-phenylene)(2E,2'E)-diacrylate (7e'')*

<sup>1</sup>H NMR

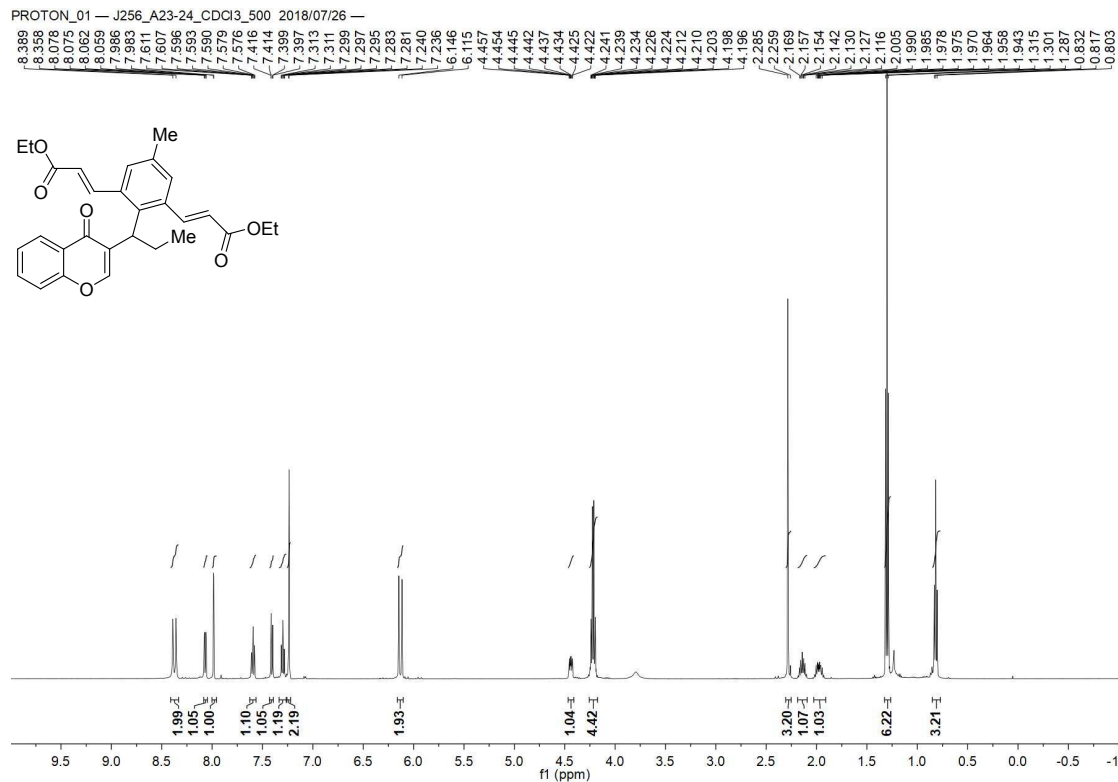

<sup>13</sup>C NMR

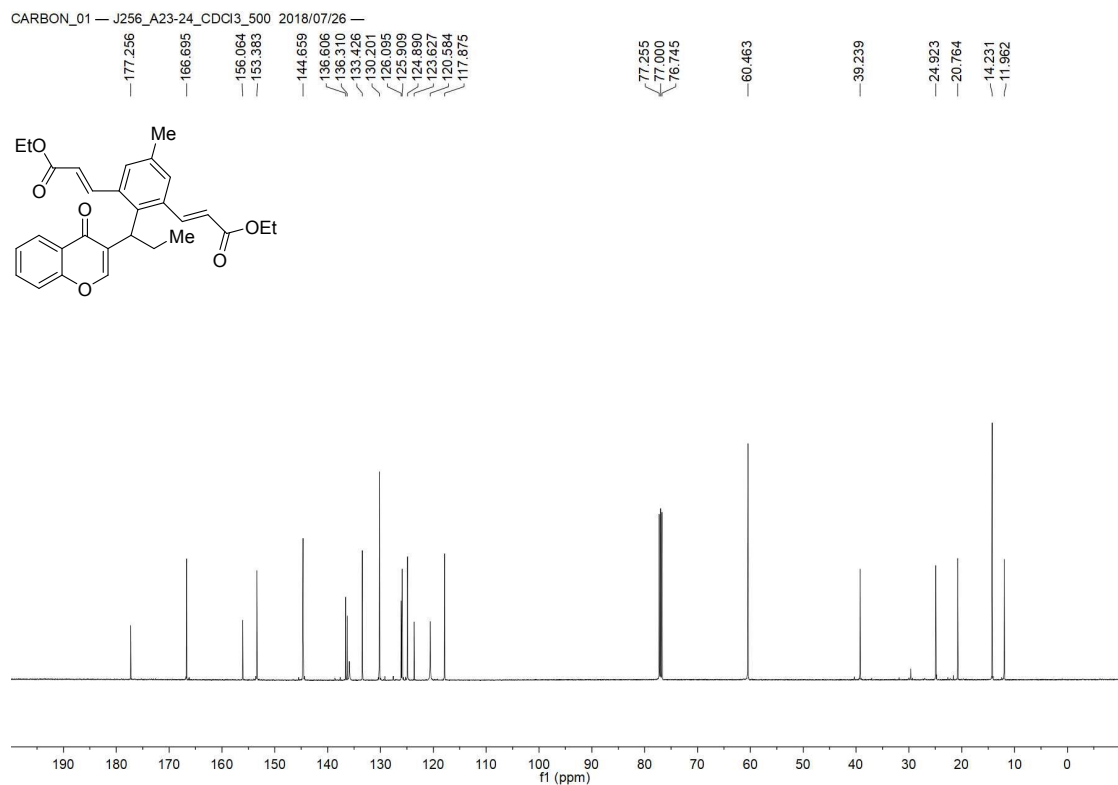



Butyl *(E)*-3-(2-(1-(7-methoxy-4-oxo-4*H*-chromen-3-yl)propyl)-4,5-dimethylphenyl)acrylate (**7f**)  
<sup>1</sup>H NMR

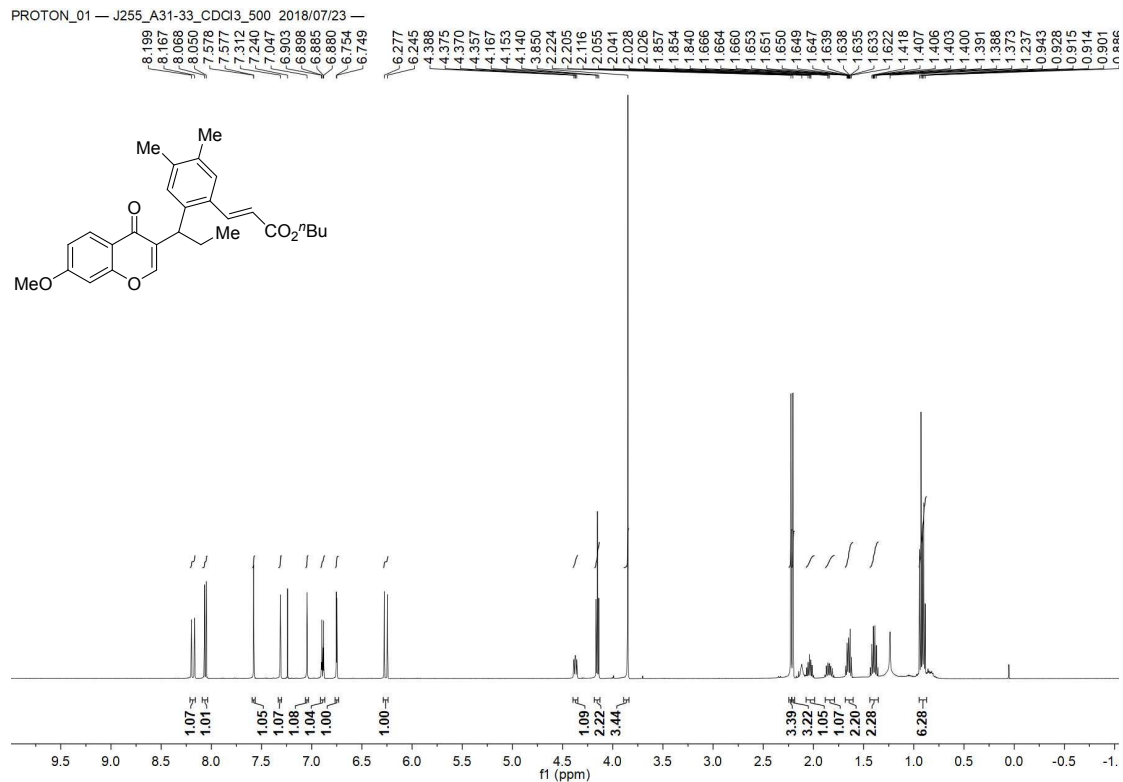

<sup>13</sup>C NMR

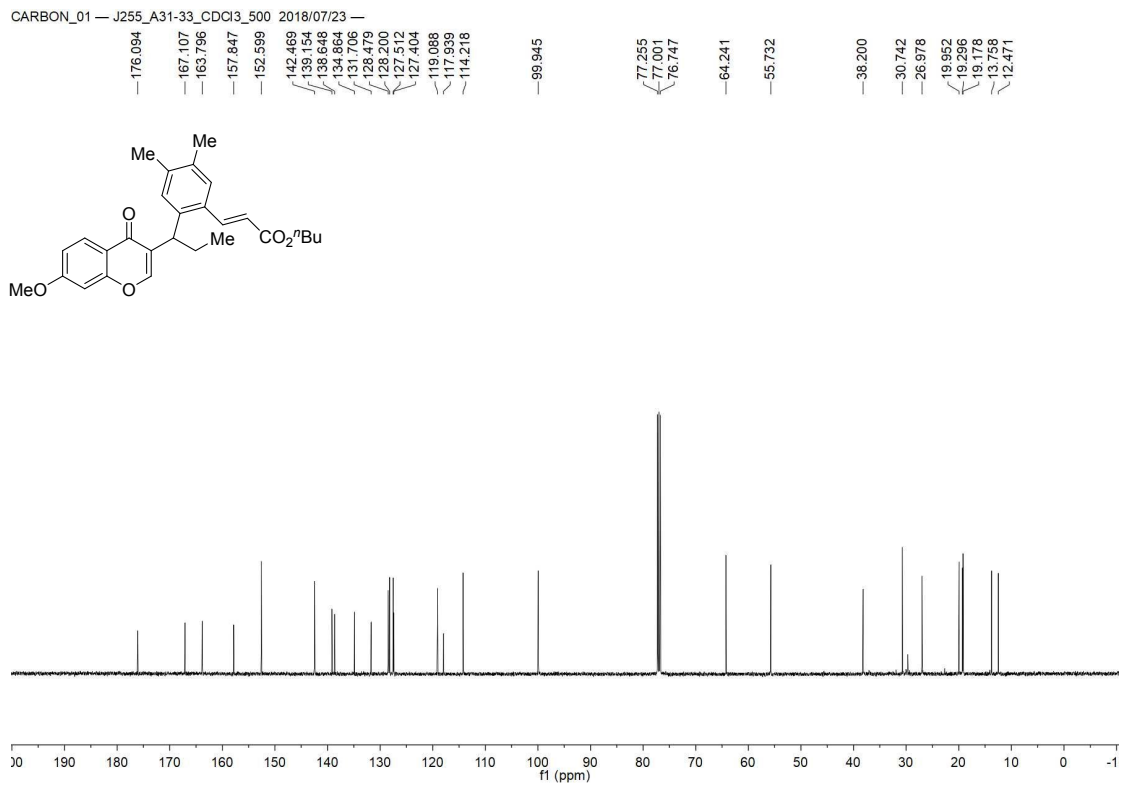

*Dibutyl 3,3'-(2-(1-(7-methoxy-4-oxo-4H-chromen-3-yl)propyl)-4,5-dimethyl-1,3-phenylene)(2E,2'E)-diacrylate (7f'')*

<sup>1</sup>H NMR

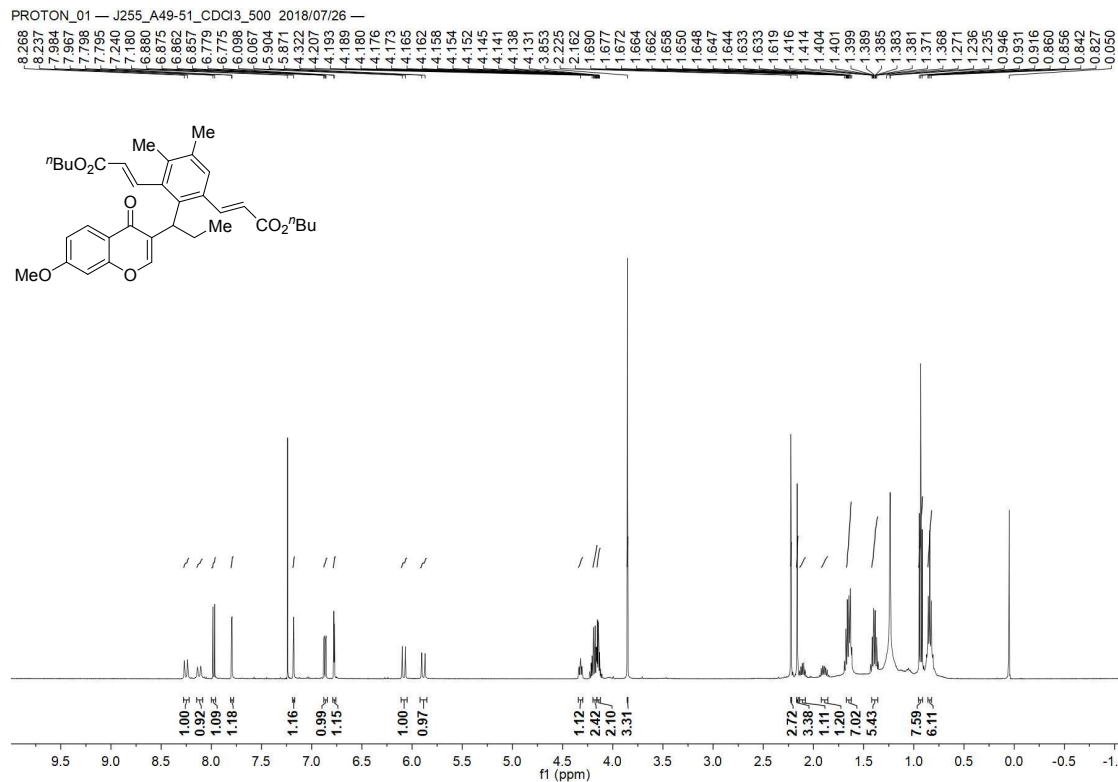

<sup>13</sup>C NMR

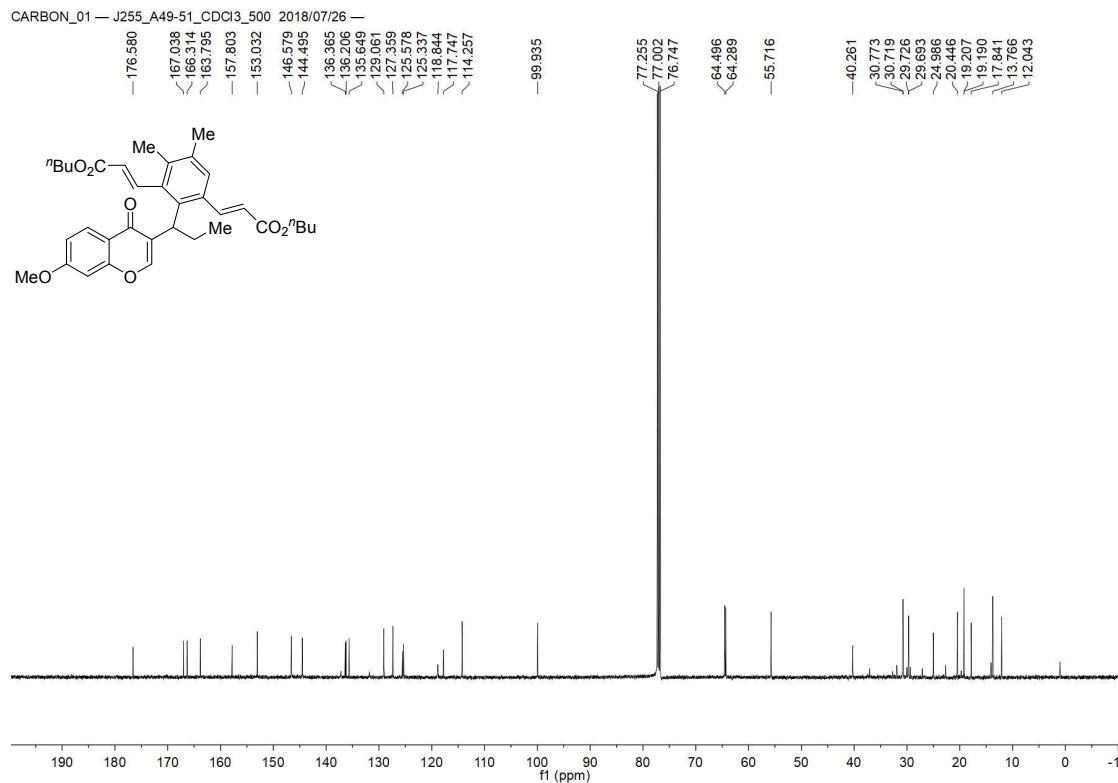

*Butyl methylphenylacrylate (7g)* *(E)-3-(2-(1-(7-methoxy-4-oxo-4H-chromen-3-yl)propyl)-5-methylphenyl)acrylate (7g)*  
<sup>1</sup>H NMR

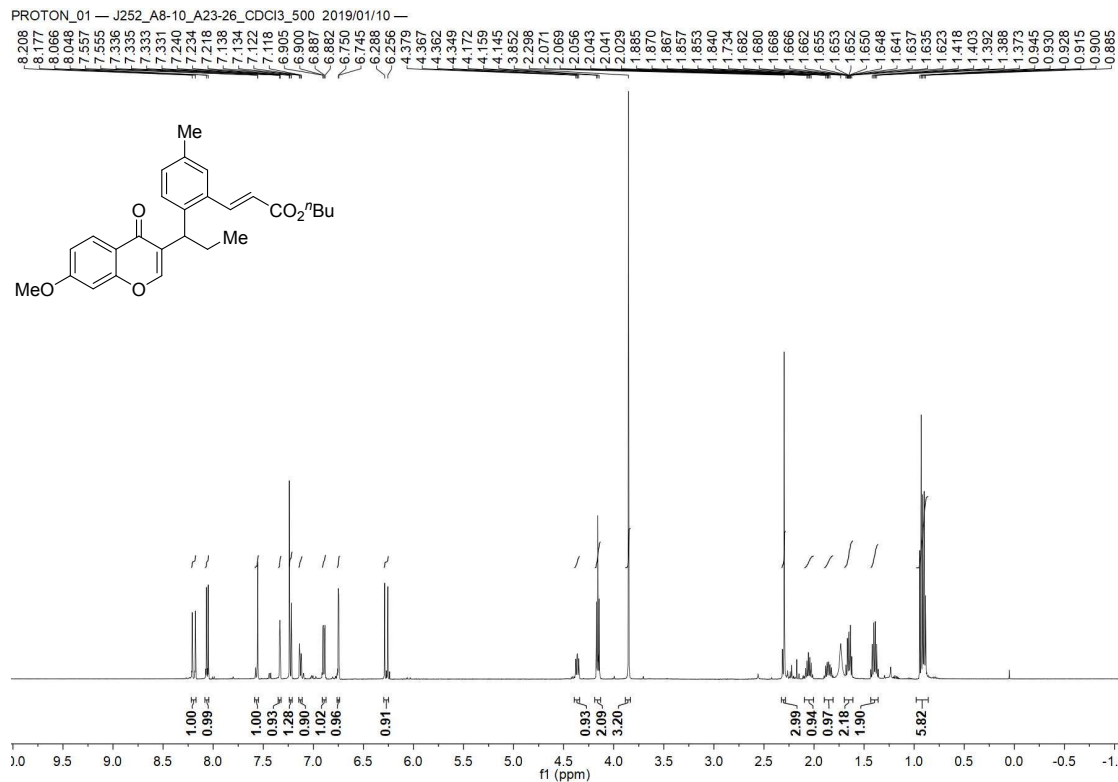

<sup>13</sup>C NMR

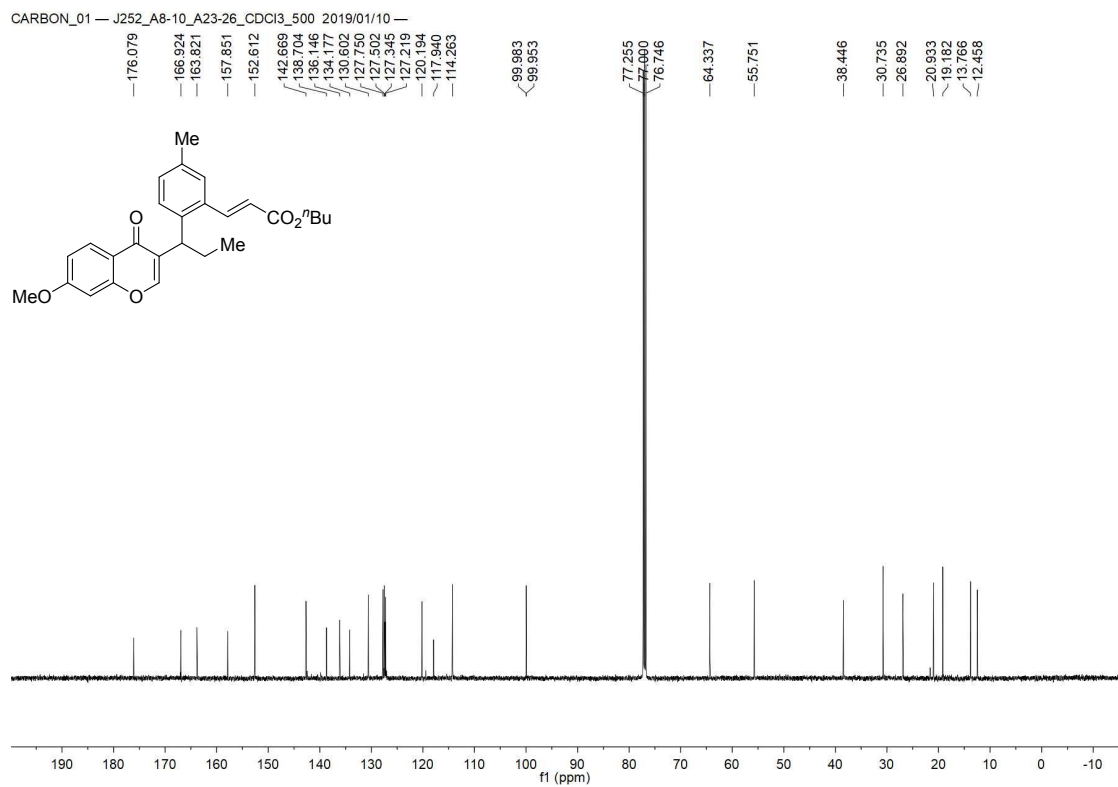

*Butyl(E)-3-(2-(1-(7-methoxy-4-oxo-4H-chromen-3-yl)propyl)-3methylphenyl)acrylate*  
(7g')

<sup>1</sup>H NMR

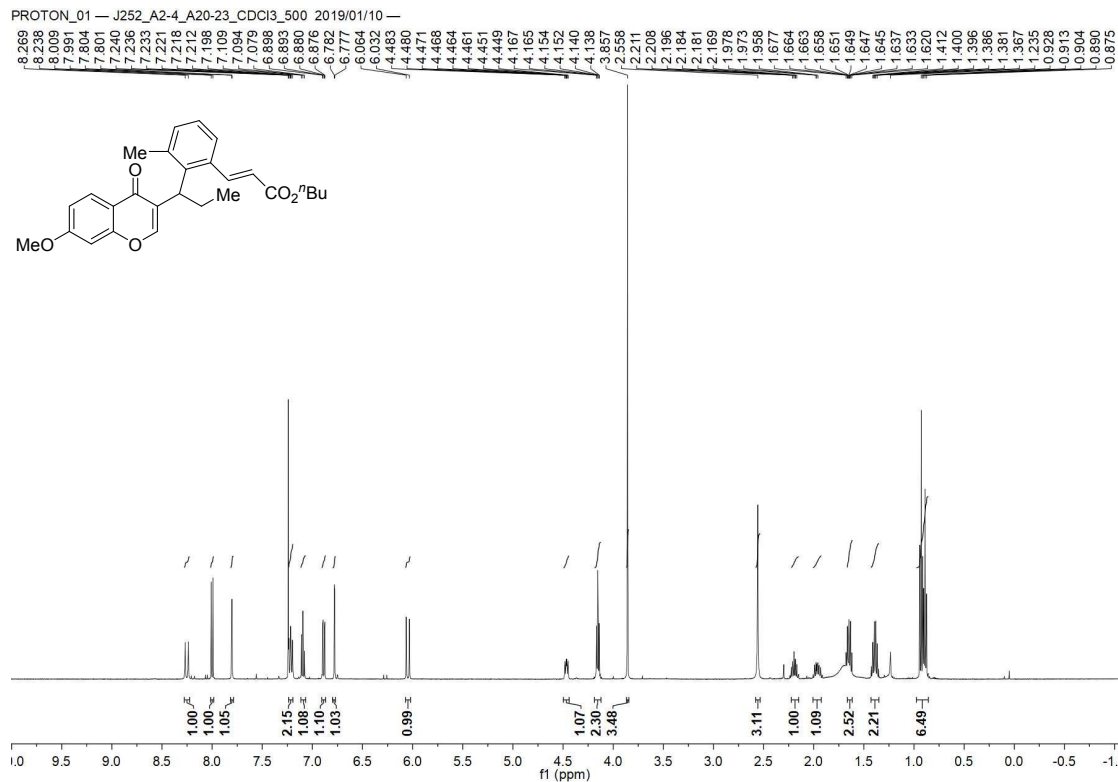

<sup>13</sup>C NMR

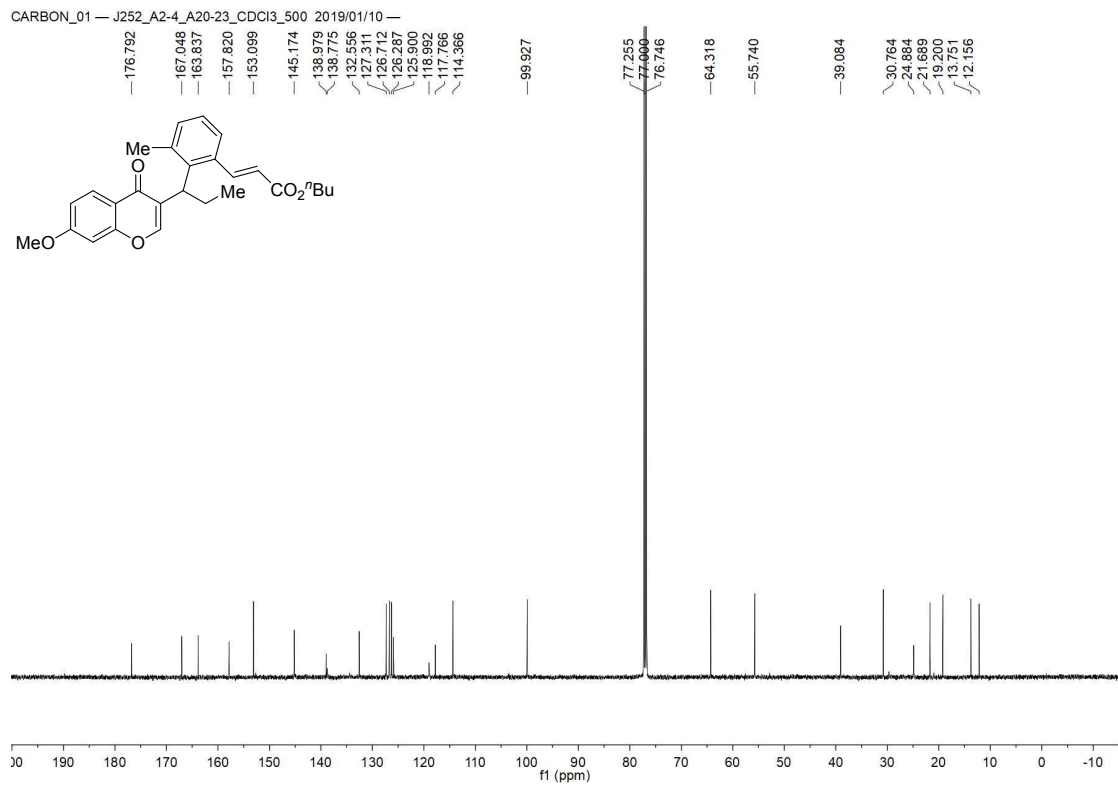

*Dibutyl 3,3'-(2-(1-(7-methoxy-4-oxo-4H-chromen-3-yl)propyl)-5-methyl-1,3-phenylene)(2E,2'E)-diacrylate (7g)*  
<sup>1</sup>H NMR

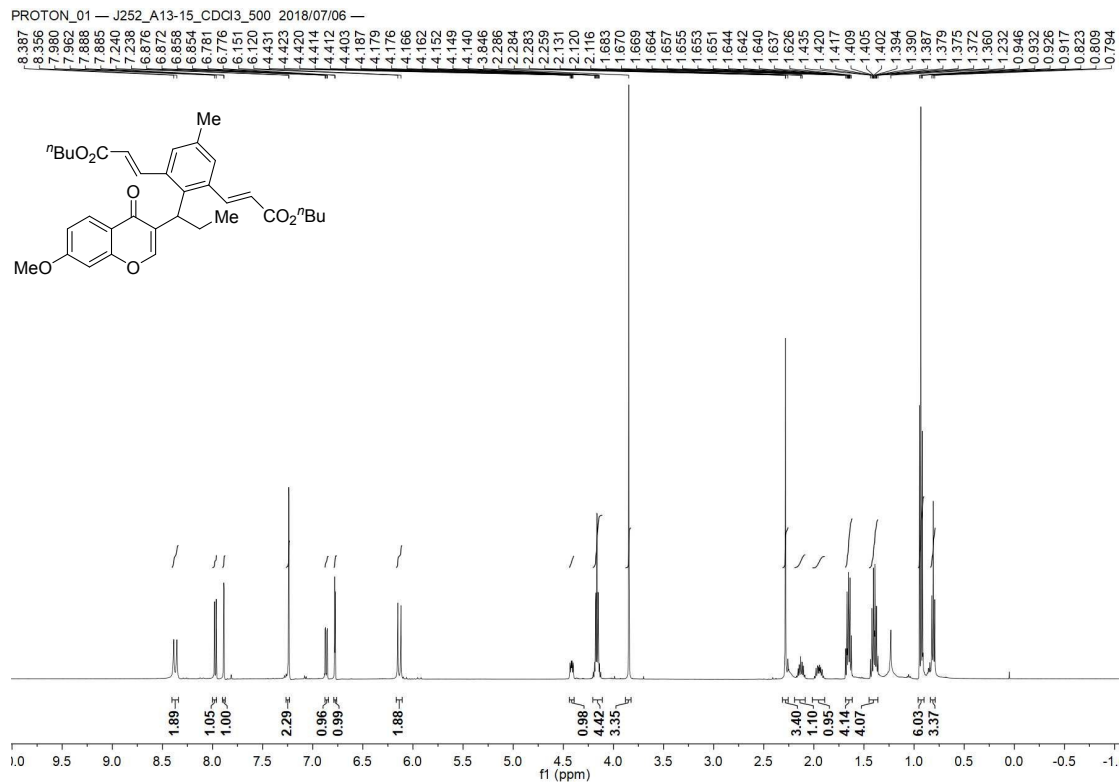

<sup>13</sup>C NMR

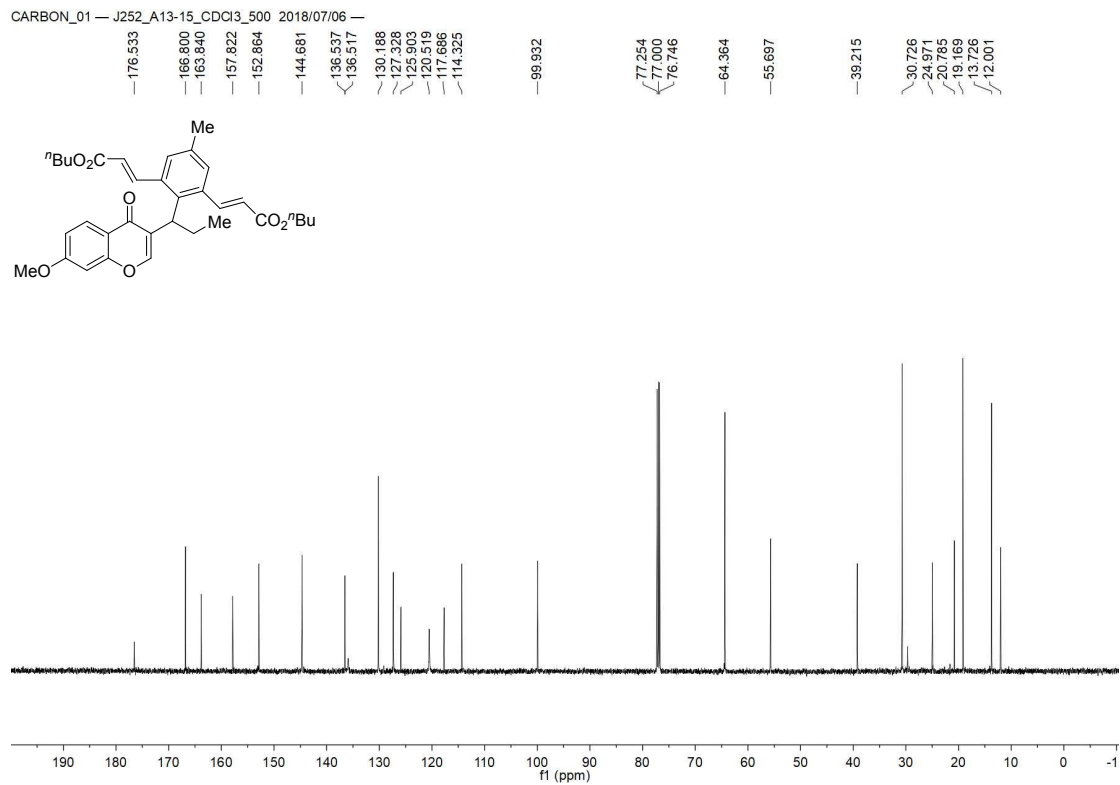

*(E)*-3-(1-(2,4-Dimethyl-6-(2-(phenylsulfonyl)vinyl)phenyl)propyl)-4H-chromen-4-one  
(7h)

<sup>1</sup>H NMR

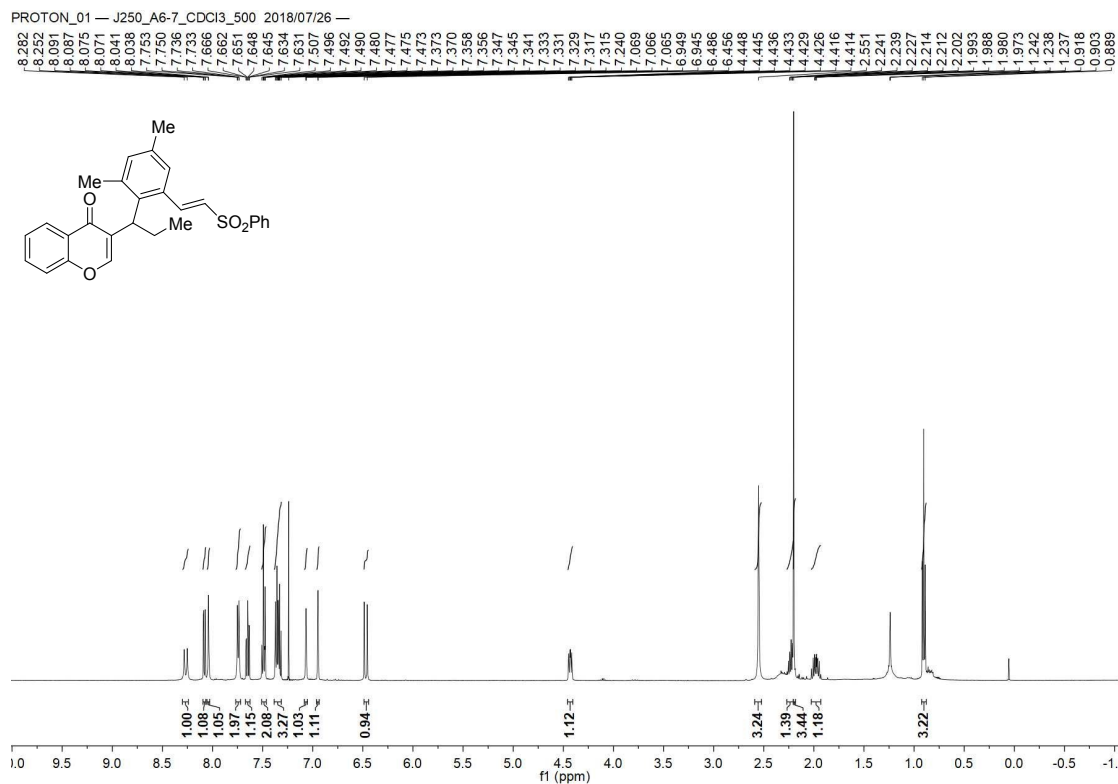

<sup>13</sup>C NMR

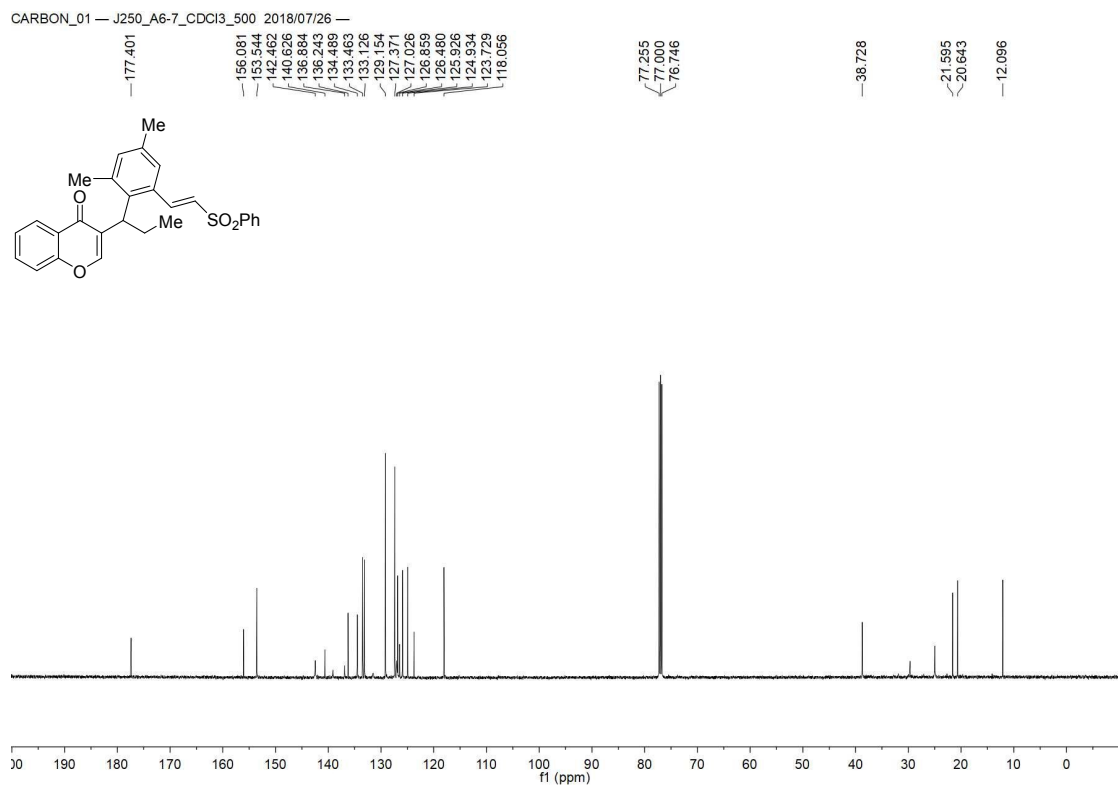

*Ethyl (E)-3-(3,5-dimethyl-2-(1-(4-oxo-4H-chromen-3-yl)propyl)phenyl)acrylate (7i)*  
<sup>1</sup>H NMR

PROTON\_01 — J248\_A11-12\_CDCl3\_500 2018/07/09 —

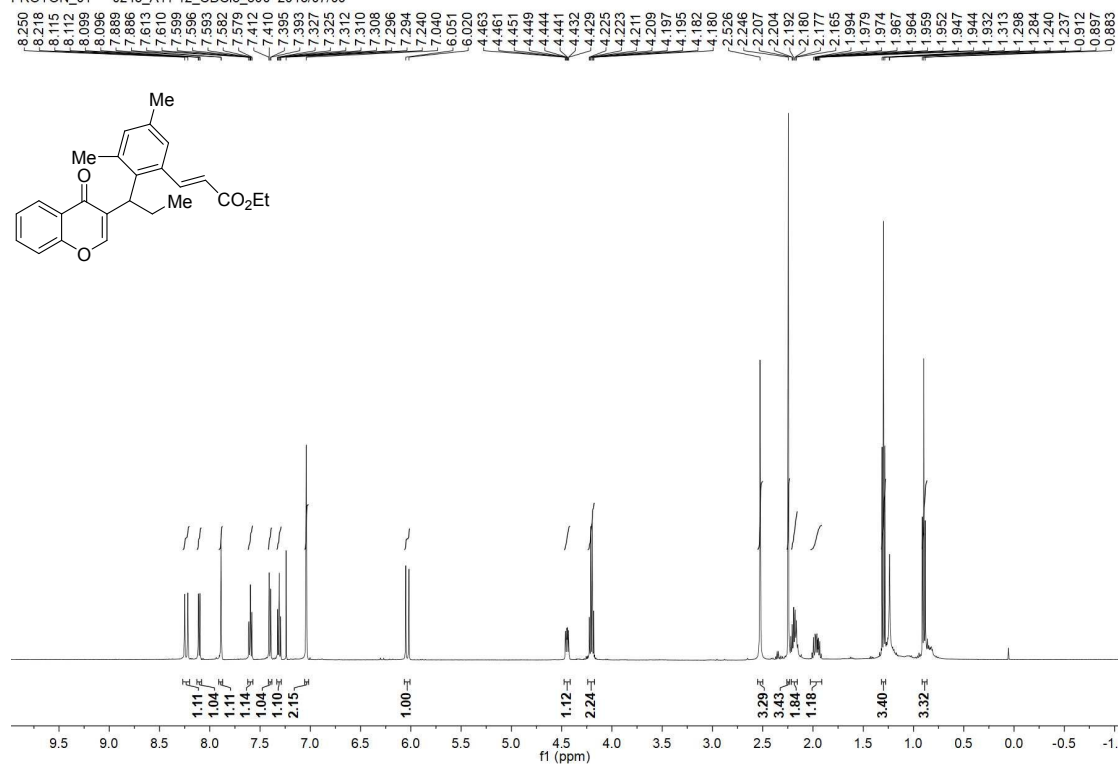

<sup>13</sup>C NMR

CARBON\_01 — J248\_A11-12\_CDCl3\_500 2018/07/09 —

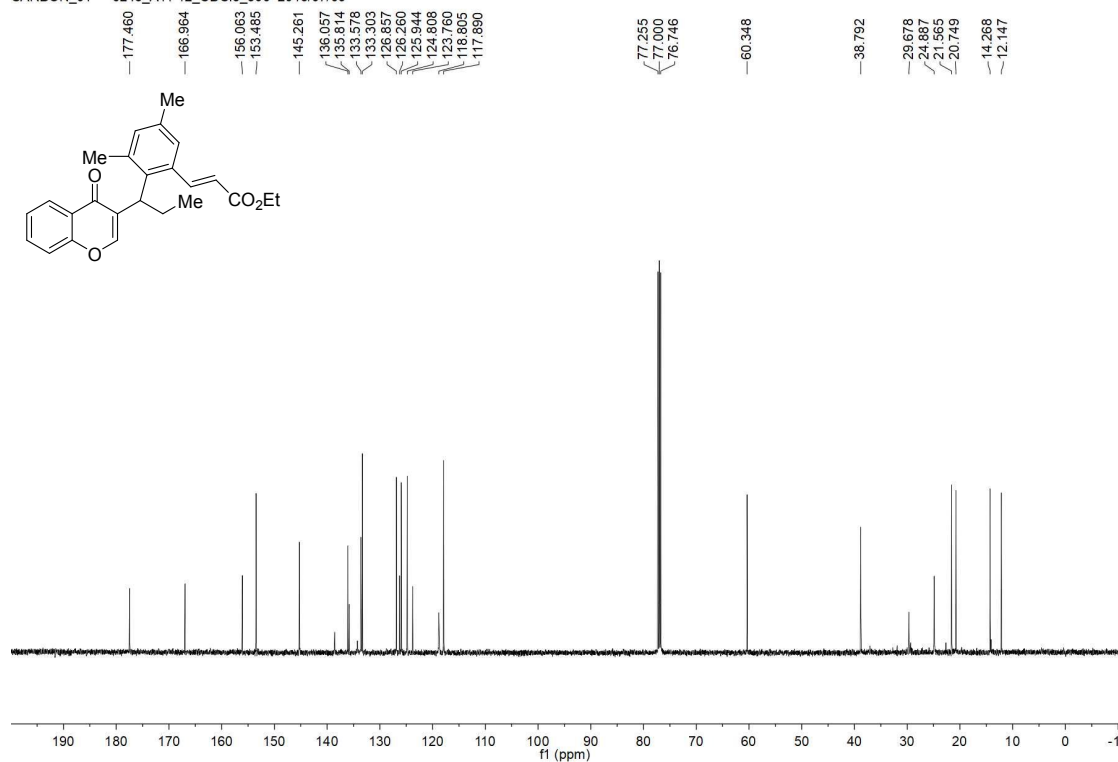

*Butyl (E)-3-(2-(1-(6-fluoro-4-oxo-4H-chromen-3-yl)propyl)-5-methylphenyl)acrylate*  
**(7j)**

<sup>1</sup>H NMR

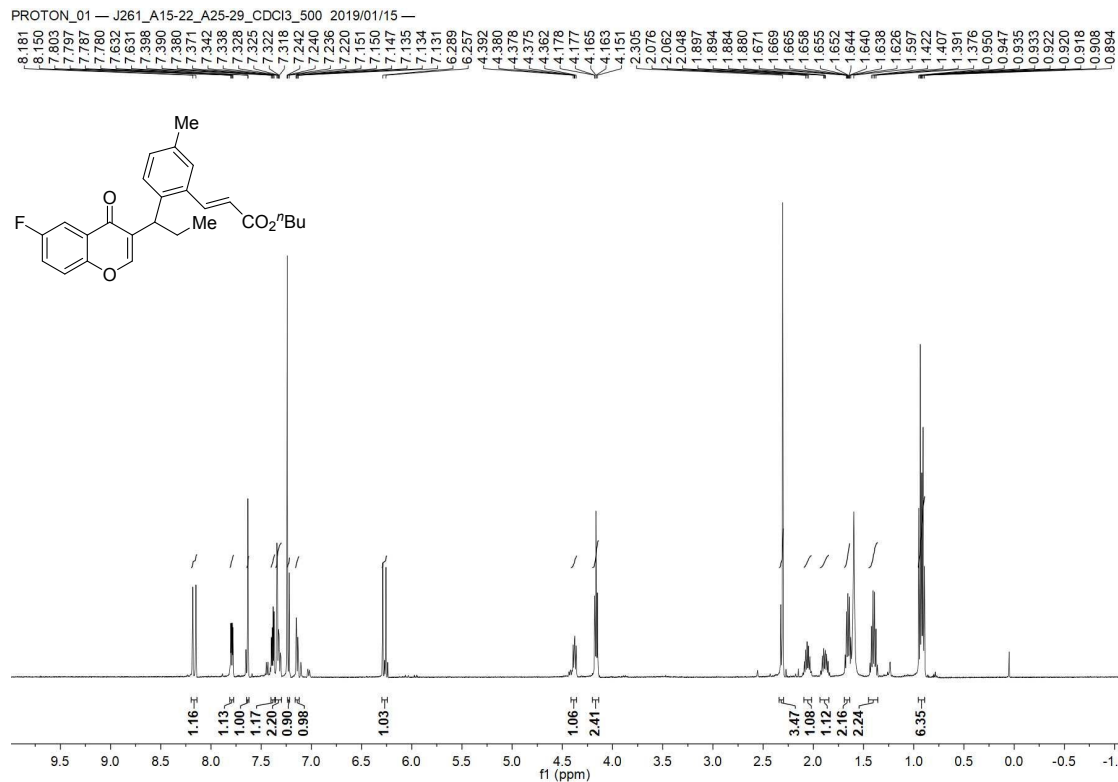

<sup>13</sup>C NMR

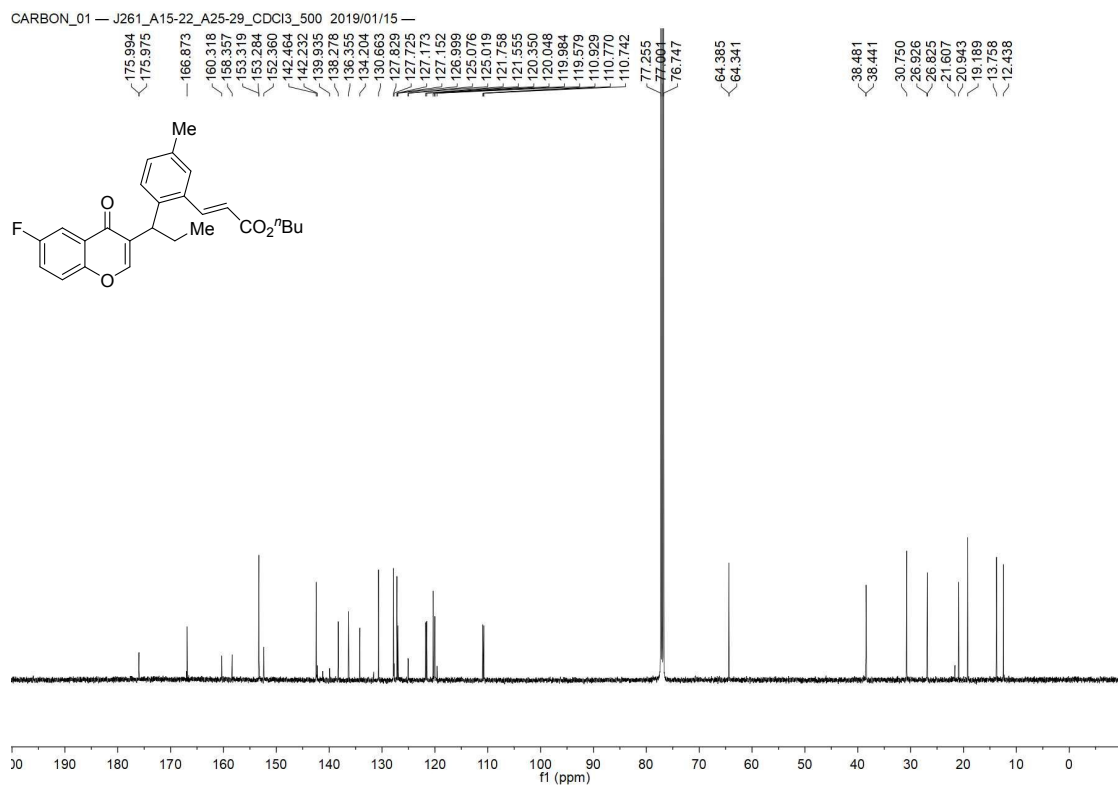



*Butyl (E)-3-(2-(1-(6-fluoro-4-oxo-4H-chromen-3-yl)propyl)-3-methylphenyl)acrylate*  
(7j')

<sup>1</sup>H NMR

PROTON\_01 — J261\_A9-11\_A38-43\_CDCl3\_500 2019/01/22 —

8.232, 8.201, 7.886, 7.884, 7.740, 7.734, 7.723, 7.717, 7.426, 7.408, 7.408, 7.399, 7.346, 7.340, 7.331, 7.328, 7.325, 7.321, 7.312, 7.306, 7.240, 7.237, 7.223, 7.223, 7.203, 7.192, 7.107, 7.092, 6.063, 6.031, 4.486, 4.476, 4.474, 4.469, 4.466, 4.457, 4.454, 4.162, 4.160, 4.148, 4.147, 4.135, 4.133, 2.555, 2.222, 2.208, 2.193, 1.657, 1.655, 1.644, 1.642, 1.642, 1.637, 1.630, 1.628, 1.626, 1.624, 1.612, 1.593, 1.404, 1.393, 1.389, 1.378, 1.374, 1.371, 1.359, 0.938, 0.923, 0.914, 0.909, 0.899, 0.884

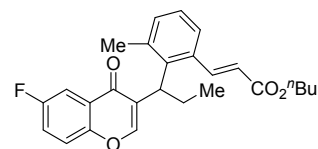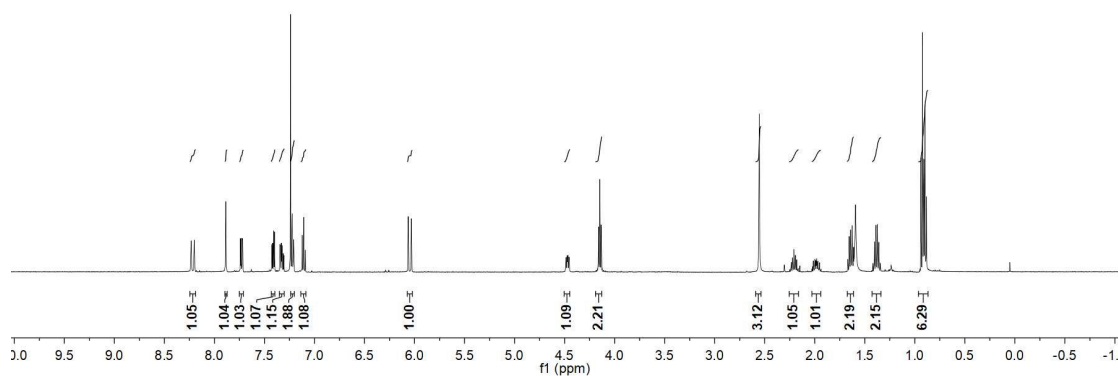

<sup>13</sup>C NMR

CARBON\_01 — J261\_A9-11\_A38-43\_CDCl3\_500 2019/01/22 —

176.675, 176.657, 166.994, 160.316, 158.386, 153.690, 152.313, 145.005, 138.758, 138.545, 134.390, 132.607, 128.870, 128.399, 125.517, 124.872, 124.914, 121.588, 121.588, 120.087, 119.982, 119.154, 110.749, 110.561, 77.255, 77.004, 76.746, 64.353, 39.108, 30.751, 24.782, 21.669, 19.184, 13.736, 12.134

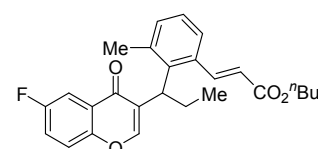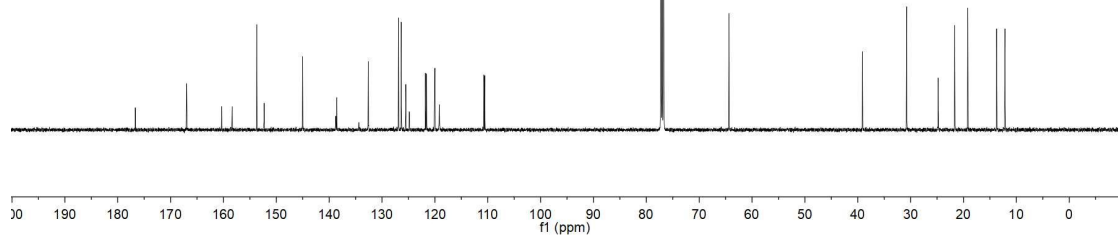

Dibutyl 3,3'-(2-(1-(6-fluoro-4-oxo-4H-chromen-3-yl)propyl)-5-methyl-1,3-phenylene)(2E,2'E)-diacrylate (7j)  
<sup>1</sup>H NMR

PROTON\_01 — J261\_A14-16\_CDCl3\_500 2018/07/24 —

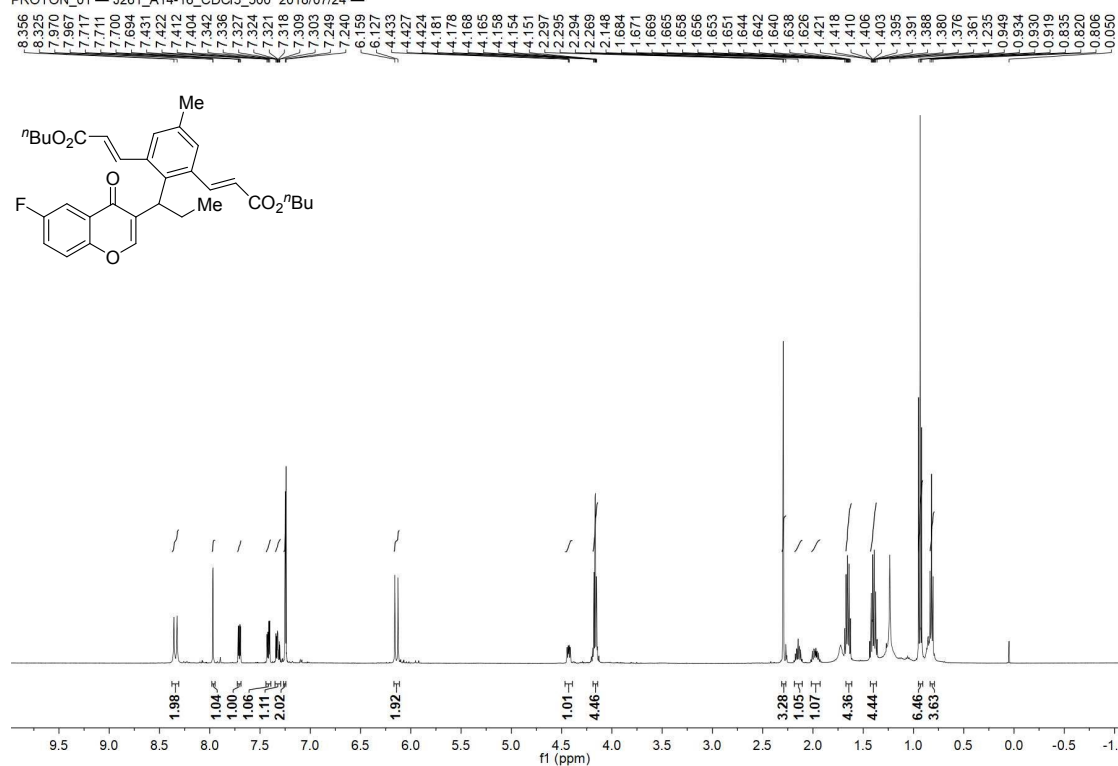

<sup>13</sup>C NMR

CARBON\_01 — J261\_A14-16\_CDCl3\_500 2018/07/24 —

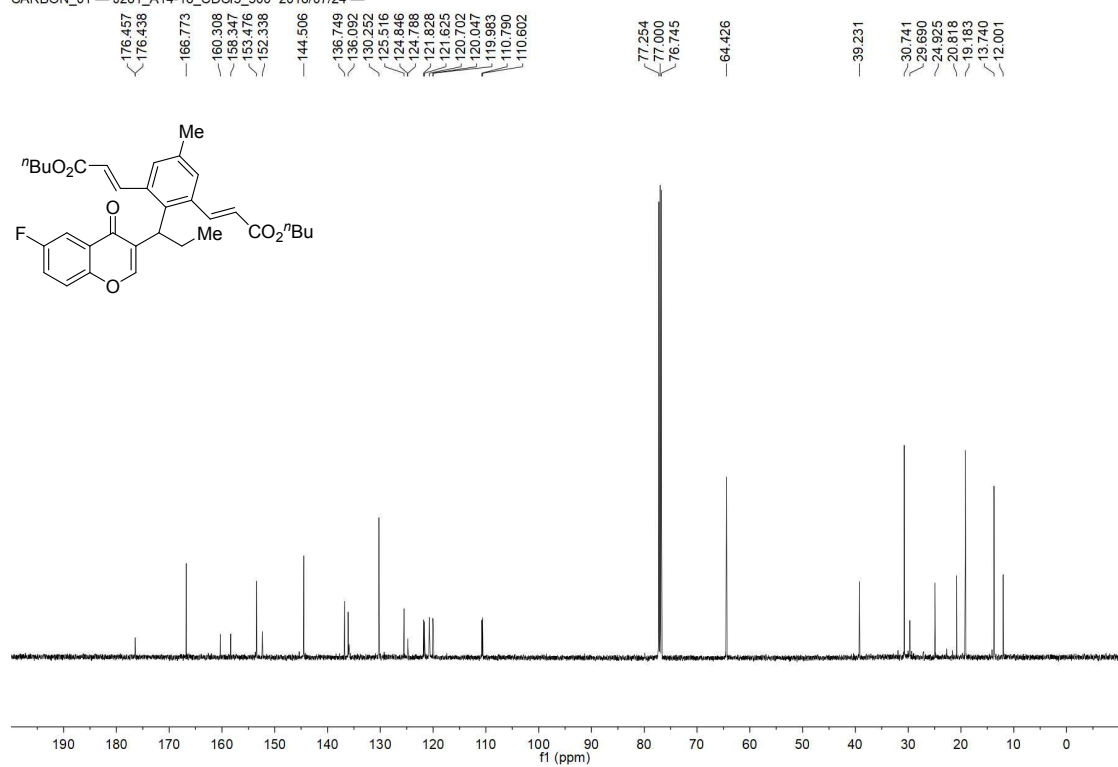

*Butyl (E)-3-(5-methyl-2-(1-(4-oxo-4H-chromen-3-yl)butyl)phenyl)acrylate (7k)*

<sup>1</sup>H NMR

PROTON\_01 — J262\_A8-10\_CDCl3\_500 2018/07/23 —

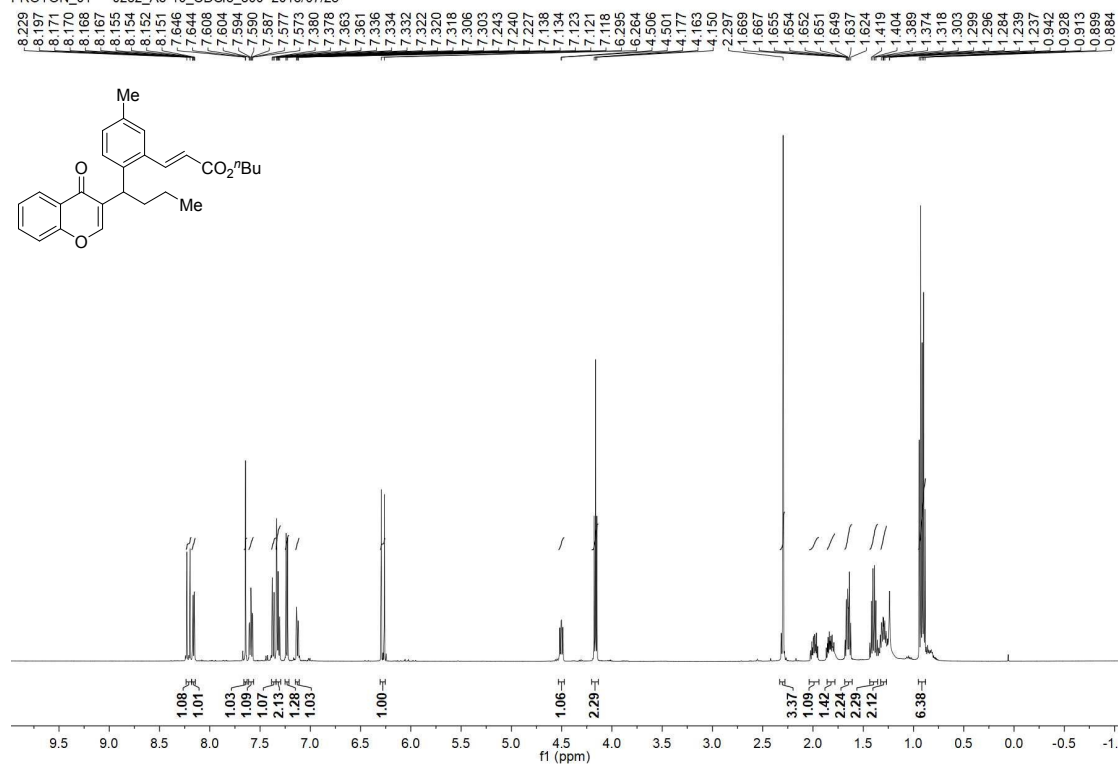

<sup>13</sup>C NMR

CARBON\_01 — J262\_A8-10\_CDCl3\_500 2018/07/23 —

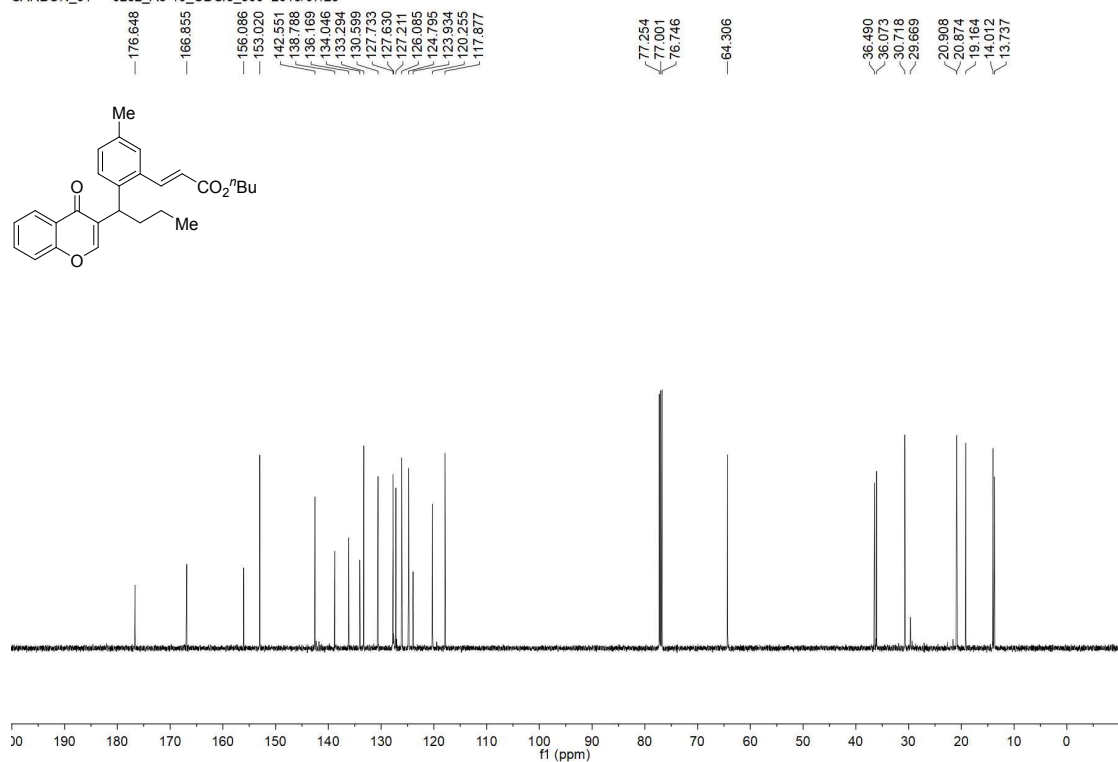

*Methyl (E)-3-(5-methyl-2-(1-(4-oxo-4H-chromen-3-yl)butyl)phenyl)acrylate (71)*

<sup>1</sup>H NMR

PROTON\_01 — J263\_A9-11\_A21-25\_CDCl3\_500 2019/01/10 —

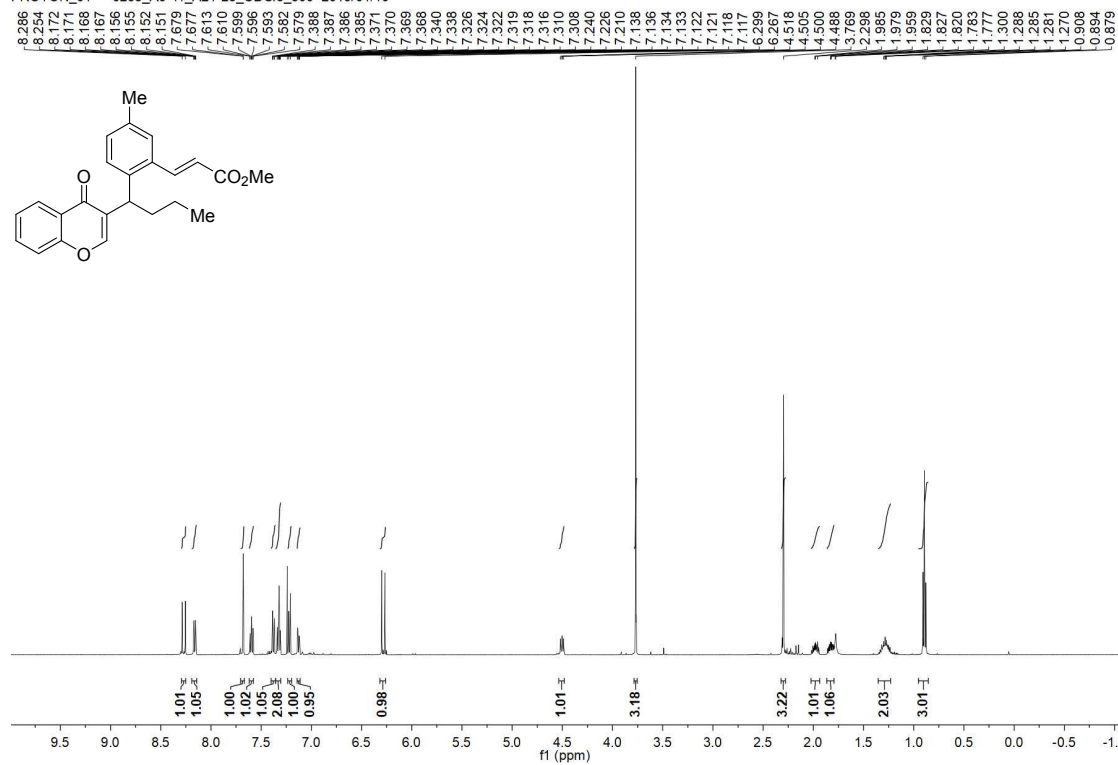

<sup>13</sup>C NMR

CARBON\_01 — J263\_A9-11\_A21-25\_CDCl3\_500 2019/01/10 —

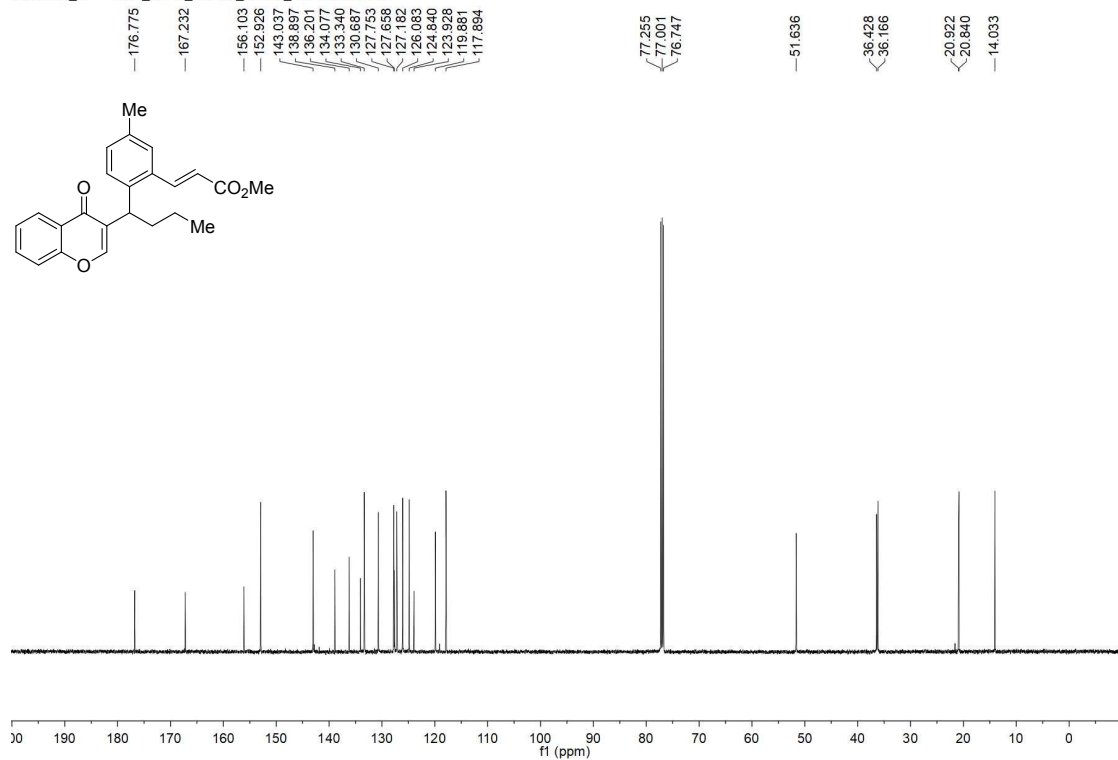

*Methyl (E)-3-(3-methyl-2-(1-(4-oxo-4H-chromen-3-yl)butyl)phenyl)acrylate (71')*

<sup>1</sup>H NMR

PROTON\_01 — J263\_A1-6\_A19-28\_CDCl3\_500 2019/01/19 —

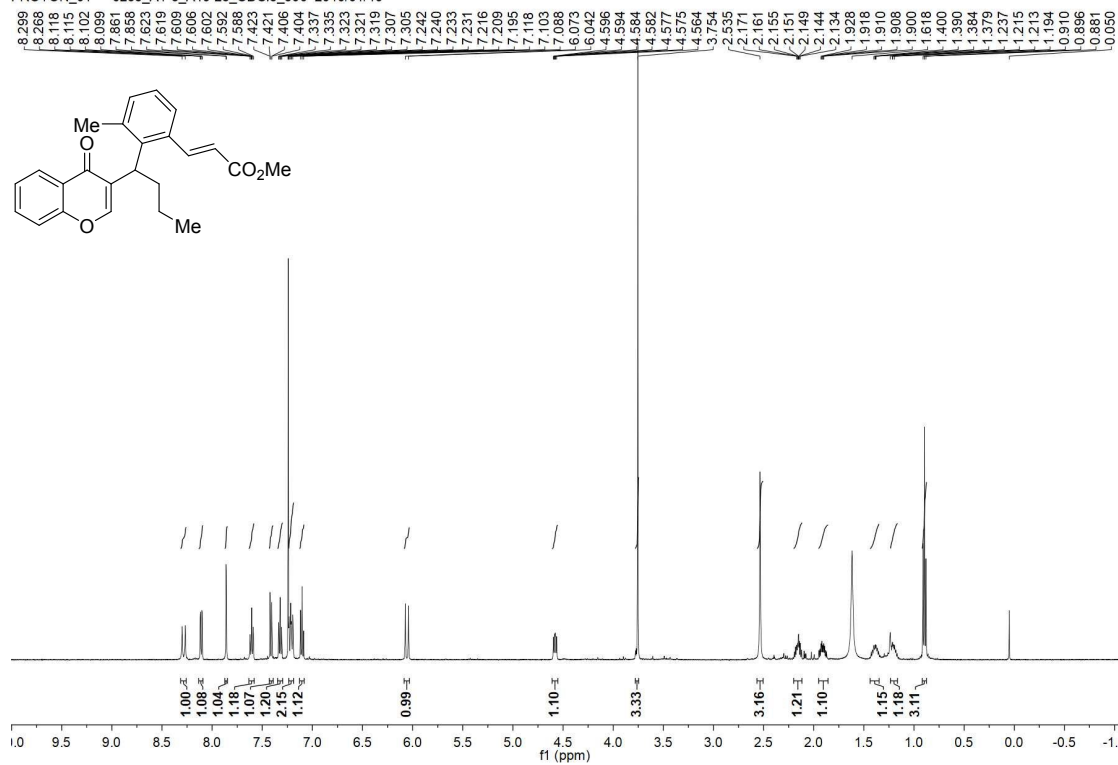

<sup>13</sup>C NMR

CARBON\_01 — J263\_A1-6\_A19-28\_CDCl3\_500 2019/01/19 —

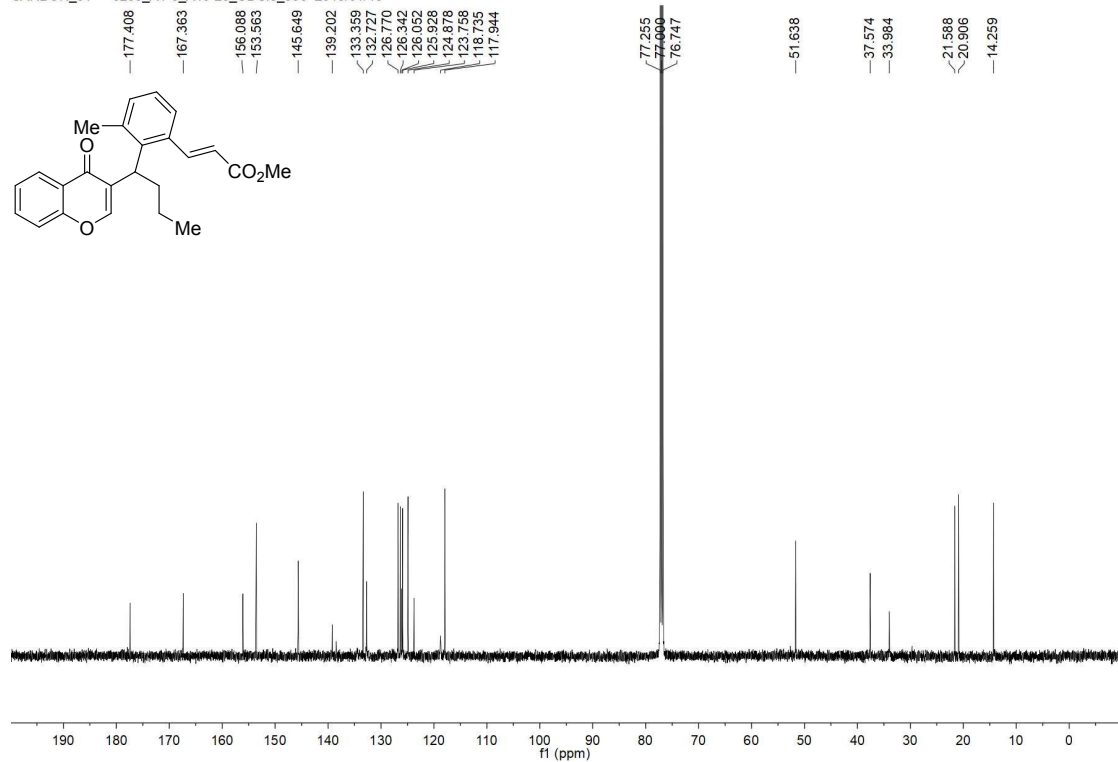

# Methyl (E)-3-(5-methyl-2-(1-(4-oxo-4H-chromen-3-yl)butyl)phenyl)acrylate (71'')

## <sup>1</sup>H NMR

PROTON\_01 — J263\_A19-21\_A13-21\_CDCl3\_500 2019/01/15 —

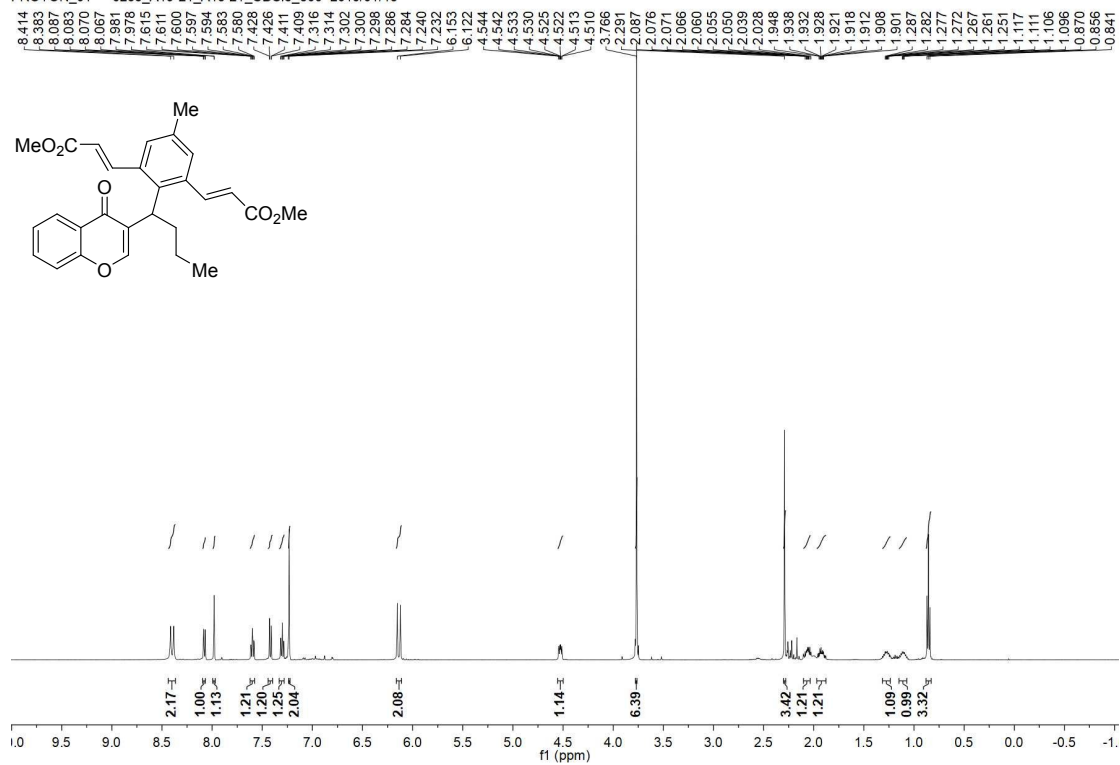

## <sup>13</sup>C NMR

CARBON\_01 — J263\_A19-21\_A13-21\_CDCl3\_500 2019/01/15 —

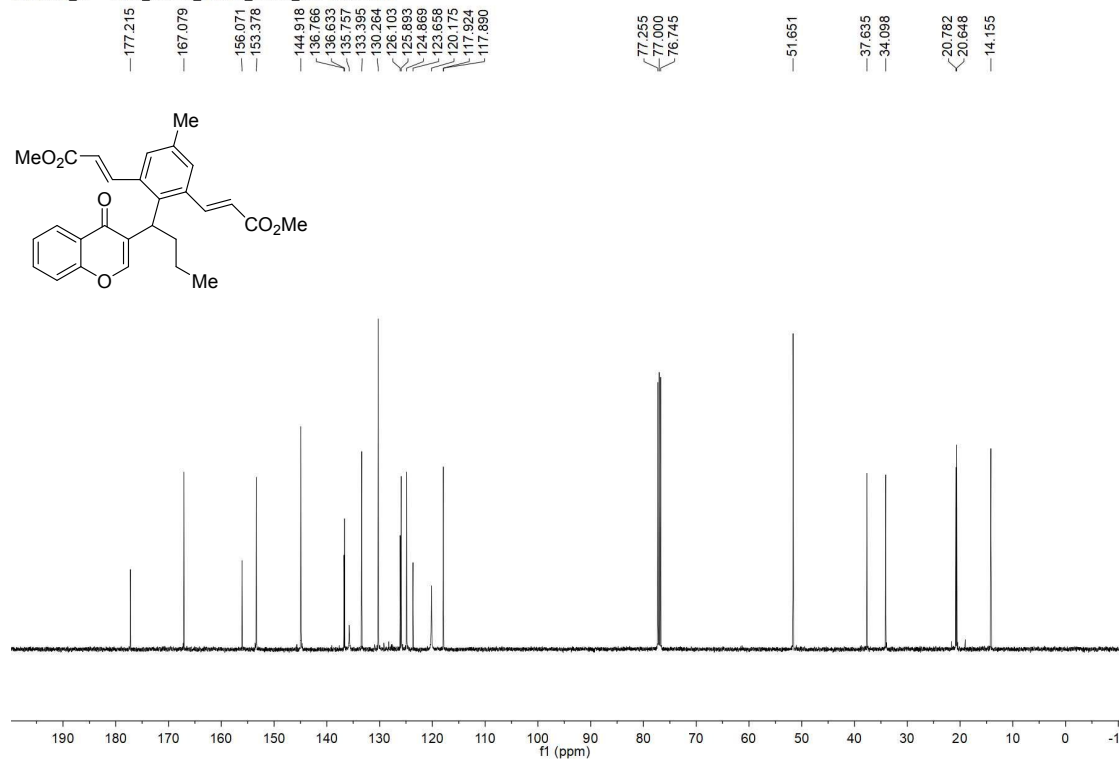

## Single crystal X-ray diffraction

The single crystal was obtained by slow evaporation of **2c** in a solution of acetone and n-hexane. The structure was solved with the Oxford Gemini dual system dingle-crystal XRD equipped with Cryojet, and refined with the SHELXL-2014 using Least Squares minimization. The X-ray crystallographic data can be obtained free of charge from the Cambridge Crystallographic Data Center via [www.ccdc.cam.ac.uk/data\\_request/cif](http://www.ccdc.cam.ac.uk/data_request/cif).

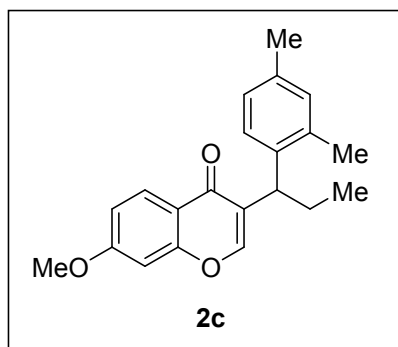

IC19207 in P-1

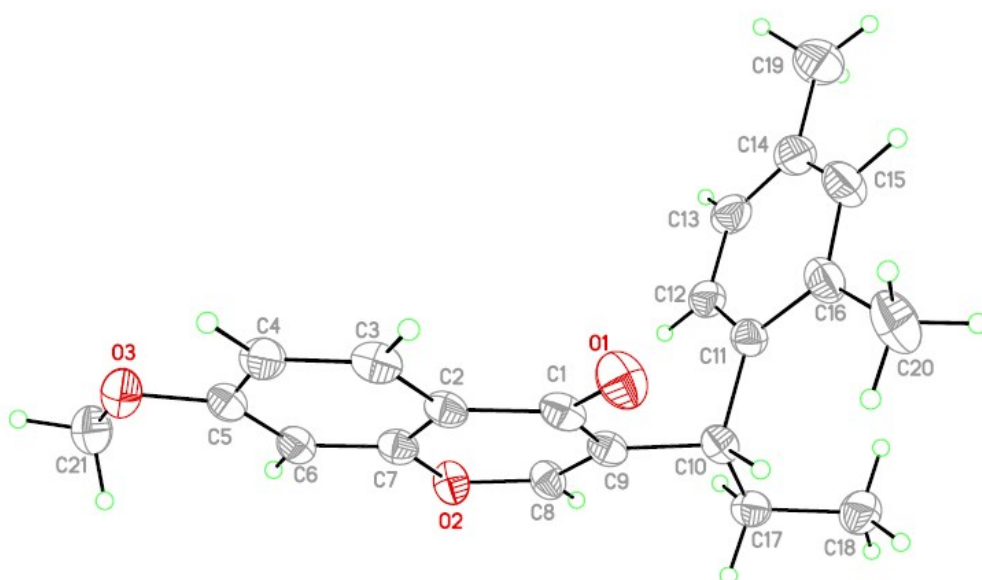

**Figure S1.** ORTEP plot of the crystallographic structure of **2c**. Thermal probability ellipsoids are shown at the 50% probability level.

**Table S1.** Crystal data and experimental details for ic19207 (**2c**).

|                                   | Crystal data                                   |                  |
|-----------------------------------|------------------------------------------------|------------------|
| Empirical formula                 | C <sub>21</sub> H <sub>22</sub> O <sub>3</sub> |                  |
| Formula weight                    | 322.38                                         |                  |
| Crystal system                    | Triclinic                                      |                  |
| Space group                       | P-1                                            |                  |
| Unit cell dimensions              | a = 6.3862(3) Å                                | α = 100.358(5)°. |
|                                   | b = 8.2346(4) Å                                | β = 97.648(5)°.  |
|                                   | c = 17.2255(12) Å                              | γ = 95.824(4)°.  |
| Volume                            | 875.83(9) Å <sup>3</sup>                       |                  |
| Z                                 | 2                                              |                  |
| F(000)                            | 344                                            |                  |
| Density (calculated)              | 1.222 Mg/m <sup>3</sup>                        |                  |
| Wavelength                        | 0.71073 Å                                      |                  |
| Cell parameters reflections used  | 2406                                           |                  |
| Theta range for Cell parameters   | 4.0070 to 28.7000°.                            |                  |
| Absorption coefficient            | 0.081 mm <sup>-1</sup>                         |                  |
| Temperature                       | 150(2) K                                       |                  |
| Crystal size                      | 0.20 x 0.20 x 0.15 mm <sup>3</sup>             |                  |
|                                   | Data collection                                |                  |
| Diffractionmeter                  | Xcalibur, Atlas, Gemini                        |                  |
| Absorption correction             | Semi-empirical from equivalents                |                  |
| Max. and min. transmission        | 1.00000 and 0.95886                            |                  |
| No. of measured reflections       | 5933                                           |                  |
| No. of independent reflections    | 3771 [R(int) = 0.0194]                         |                  |
| No. of observed [I > 2σ(I)]       | 2764                                           |                  |
| Completeness to theta = 25.242°   | 99.2 %                                         |                  |
| Theta range for data collection   | 3.152 to 27.497°.                              |                  |
|                                   | Refinement                                     |                  |
| Final R indices [I > 2σ(I)]       | R1 = 0.0618, wR2 = 0.1916                      |                  |
| R indices (all data)              | R1 = 0.0861, wR2 = 0.2156                      |                  |
| Goodness-of-fit on F <sup>2</sup> | 1.329                                          |                  |
| No. of reflections                | 3771                                           |                  |
| No. of parameters                 | 217                                            |                  |
| No. of restraints                 | 0                                              |                  |
| Largest diff. peak and hole       | 0.414 and -0.407 e.Å <sup>-3</sup>             |                  |
